# Supplementary material
Source: PubMed Central journal article supplement (PMC8312276)
Supplement: NIHMS1720392-supplement-Kovacs_SI_PMID_29411979.pdf [file NIHMS1720392-supplement-Kovacs_SI_PMID_29411979.pdf]

## Supplemental Material for:

### How Do Ring Size and $\pi$ -Donating Thiolate Ligands Affect Redox-Active, $\alpha$ -Imino-N-heterocycle Ligand Activation?

Benjamin Leipzig<sup>‡</sup>, Julian A. Rees<sup>‡</sup>, Joanna K. Kowalska<sup>§</sup>, Roslyn Theisen<sup>‡</sup>, Matjaž Kavčič<sup>\*\*</sup>, Penny Chaau Yan Poon, Werner Kaminsky<sup>††</sup>, Serena DeBeer<sup>§</sup>, Eckhard Bill<sup>§</sup>, and Julie A. Kovacs<sup>\*‡</sup>

<sup>‡</sup>*The Department of Chemistry, University of Washington: Box 351700 Seattle, WA 98195-1700.* <sup>§</sup>*Max-Planck Institute for Chemical Energy Conversion, Stiftstrasse 34–36, D–45470 Mülheim an der Ruhr, Germany,* <sup>\*\*</sup>*Jožef Stefan Institute, Ljubljana, Slovenia*

|                                                                                                                                                                                                                                                                             | Page    |
|-----------------------------------------------------------------------------------------------------------------------------------------------------------------------------------------------------------------------------------------------------------------------------|---------|
| <b>Experimental.</b>                                                                                                                                                                                                                                                        |         |
| General Methods                                                                                                                                                                                                                                                             | S5-S6   |
| Synthesis of 2-benzylsulfanylmethyl-2-methyl-propane-1,3-( <i>tert</i> -Butyloxy carbonyl) diamine ( <b>D</b> )                                                                                                                                                             | S6-S7   |
| Synthesis of 2-thiomethyl-2-methyl-propane-1,3-( <i>tert</i> -Butyloxycarbonyl) diamine ( <b>E</b> )                                                                                                                                                                        | S7      |
| Synthesis of 2-thiomethyl-2-methyl-propane-1,3-diamine dihydrochloride ( <b>F</b> ).                                                                                                                                                                                        | S8      |
| Synthesis of 2-benzylsulfanylmethyl-2-methyl-propane-1,3-( <i>tert</i> -Butyloxycarbonyl) diamine ( <b>G</b> )                                                                                                                                                              | S8-S9   |
| Synthesis of 2-thiomethyl-2-methyl-propane-1,3-( <i>tert</i> -Butyloxycarbonyl)diamine ( <b>H</b> )                                                                                                                                                                         | S9      |
| Synthesis of 2-thiomethyl-2-methyl-propane-1,3-diaminedihydrogenchloride ( <b>I</b> )                                                                                                                                                                                       | S9-S10  |
| Synthesis of $[\text{Fe}^{\text{II}}(\text{tame}-(\text{N}_2\text{S}(\text{py})_2)]_2(\text{PF}_6)_2$ ( <b>1</b> ).                                                                                                                                                         | S10-S11 |
| Synthesis of $[\text{Fe}^{\text{II}}(\text{tame}-(\text{N}_2\text{S}(\text{py})_2)]_2(\text{BPh}_4)_2$ ( <b>1-BPh</b> <sub>4</sub> )                                                                                                                                        | S11     |
| Synthesis of $[\text{Fe}^{\text{II}}(\text{tame}-(\text{N}_2\text{S}(\text{quino})_2)]_2(\text{PF}_6)_2$ ( <b>2</b> ).                                                                                                                                                      | S11     |
| Synthesis of $[\text{Fe}^{\text{II}}(\text{tame}-(\text{N}_2\text{S}(\text{quino})_2)]_2(\text{BPh}_4)_2$ ( <b>2-BPh</b> <sub>4</sub> ).                                                                                                                                    | S11-S12 |
| Synthesis of $[\text{Fe}^{\text{II}}(\text{tame}-(\text{N}_2\text{S}^{\text{Me}}\text{Im})_2)]_2(\text{PF}_6)_2 \cdot 2\text{MeCN}$ ( <b>3</b> ).                                                                                                                           | S12     |
| Synthesis of $[\text{Co}^{\text{II}}(\text{tame}-(\text{N}_2\text{S}^{\text{Me}}\text{Im})_2)]_2(\text{PF}_6)_2 \cdot 2\text{MeCN}$ ( <b>4</b> ).                                                                                                                           | S12-S13 |
| Synthesis of Thioether-ligated $[\text{Fe}^{\text{II}}(\text{tame}-(\text{N}_2\text{S}^{\text{Bz,Me}}\text{Im})_2(\text{MeCN}))]^+$ ( <b>5</b> ).                                                                                                                           | S13-S14 |
| Computational Methods.                                                                                                                                                                                                                                                      | S14-S15 |
| <sup>57</sup> Fe Mössbauer Spectroscopy.                                                                                                                                                                                                                                    | S15     |
| Sulfur K-Edge X-Ray Absorption Spectroscopy.                                                                                                                                                                                                                                | S15-S16 |
| X-ray Crystallographic Structure Determination.                                                                                                                                                                                                                             | S16-S18 |
| Determining the Dimer- <b>3</b> /Monomer Equilibrium Constant                                                                                                                                                                                                               | S19     |
| Calculating the UV/vis Extinction Coefficients for Dimeric <b>3</b> and its Monomeric Derivative Using the Dimer/Monomer Equilibrium Dissociation Constant                                                                                                                  | S19-S22 |
| <b>Supplemental Figures and Schemes.</b>                                                                                                                                                                                                                                    |         |
| <b>Scheme S1.</b> Synthetic Route to tame-N <sub>2</sub> SH ligand I.                                                                                                                                                                                                       | S6      |
| <b>Figure S1.</b> Intraligand distances for <b>2</b> versus DFT calculated distances for neutral and mono-reduced ( $\alpha$ -imino)quinoline ligands.                                                                                                                      | S23     |
| <b>Figure S2.</b> Intraligand distances for <b>3</b> versus DFT calculated distances for neutral and mono-reduced ( $\alpha$ -imino)imidazole ligands.                                                                                                                      | S24     |
| <b>Figure S3.</b> <sup>1</sup> H NMR of <b>3</b> (in MeCN-d <sup>3</sup> ) in the presence (top) and absence (bottom) of (Bu <sub>4</sub> N)(N <sub>3</sub> ) showing that peaks in the paramagnetic region shift, consistent with azide binding to a paramagnetic species. | S24     |
| <b>Figure S4.</b> LTQ ion trap mass spectrum of <b>3</b> in MeCN solution, versus theoretically calculated for a monocationic monomer. Isotopomers show that the majority of <b>3</b> converts to a monomer in solution.                                                    | S25     |
| <b>Figure S5.</b> LTQ ion trap mass spectrum of <b>2</b> in MeCN solution, versus theoretically calculated for a dicationic dimer. Isotopomers show that <b>2</b> maintains its dimeric structure in solution.                                                              | S25     |
| <b>Figure S6.</b> LTQ ion trap mass spectrum of <b>1</b> in MeCN solution, versus the theoretically calculated spectrum of a dicationic dimer. Isotopomers show that a portion of <b>1</b> maintains its dimeric structure in solution                                      | S26     |
| <b>Figure S7.</b> LTQ ion trap mass spectrum of <b>1</b> in MeCN solution, versus theoretically calculated for a monocationic monomer. Isotopomers show that a portion of <b>1</b> converts to a monomer in solution.                                                       | S26     |
| <b>Figure S8.</b> Variable-temperature magnetic moment of <b>3</b> in MeCN-d <sup>3</sup> solution, as determined using the Evan's method.                                                                                                                                  | S27     |

|                                                                                                                                                                                                                                                                                                                                                          |         |
|----------------------------------------------------------------------------------------------------------------------------------------------------------------------------------------------------------------------------------------------------------------------------------------------------------------------------------------------------------|---------|
| <b>Figure S9.</b> Reaction of <b>3</b> (0.045 mM) with O <sub>2</sub> in MeCN at 258 K. Scans taken at 1 min intervals. Inset shows pseudo-first order dependence.                                                                                                                                                                                       | S27     |
| <b>Figure S10.</b> Cyclic voltammograms displaying the oxidation waves associated with complexes <b>1-3</b> , and the correlation of potentials with ring size.                                                                                                                                                                                          | S28     |
| <b>Figure S11.</b> Cyclic voltammograms displaying the reduction waves associated with complexes <b>1-3</b> , and the correlation of potentials with ring size.                                                                                                                                                                                          | S28     |
| <b>Figure S12.</b> Full range of normalized sulfur K-edge X-ray absorption spectra.                                                                                                                                                                                                                                                                      | S29     |
| <b>Figure S13.</b> Calculated sulfur K-edge X-ray absorption spectra, including representative transition difference densities for <b>1</b> . Regions of increased electron density (acceptors) are shown in purple, regions of decreased electron density (donors) are shown in teal.                                                                   | S30     |
| <b>Figure S14.</b> Calculated sulfur K-edge X-ray absorption spectra including representative transition difference densities for <b>2</b> . Regions of increased electron density (acceptors) are shown in purple, regions of decreased electron density (donors) are shown in teal. Transitions marked with a * are shown in the manuscript Figure 10. | S31     |
| <b>Figure S15.</b> Calculated sulfur K-edge X-ray absorption spectra, including representative transition difference densities for <b>3</b> . Regions of increased electron density (acceptors) are shown in purple, regions of decreased electron density (donors) are shown in teal.                                                                   | S32     |
| <b>Figure S16.</b> DFT calculated MO diagram for <b>1</b> .                                                                                                                                                                                                                                                                                              | S33     |
| <b>Figure S17.</b> Zero-field Mössbauer spectrum of <b>1</b> .                                                                                                                                                                                                                                                                                           | S33     |
| <b>Figure S18.</b> Electronic absorption spectrum of the Co(II) complex <b>4</b> in MeCN at 298 K.                                                                                                                                                                                                                                                       | S34     |
| <b>Figure S19.</b> <sup>1</sup> H NMR spectrum of <b>5</b> in MeCN- <i>d</i> <sup>3</sup> at 298 K showing reproducibly observed peaks indicative of a paramagnetic species.                                                                                                                                                                             | S34     |
| <b>Supplemental Tables</b>                                                                                                                                                                                                                                                                                                                               |         |
| <b>Table S1.</b> Sulfur K-edge XAS Pre-Edge Energies for <b>1-3</b> .                                                                                                                                                                                                                                                                                    | S35     |
| <b>Table S2.</b> Selected DFT calculated bond distances (Å) for <b>1-3</b> .                                                                                                                                                                                                                                                                             | S35     |
| <b>Table S3.</b> Percent Sulfur Character in the Lowest Unoccupied (LUMO) and Highest Occupied Molecular Orbitals (HOMOs) of <b>1-3</b> .                                                                                                                                                                                                                | S36     |
| <b>Table S4.</b> Crystal Data for [Fe <sup>II</sup> (tame-(N <sub>2</sub> S(py) <sub>2</sub> ) <sub>2</sub> )] <sub>2</sub> (BPh <sub>4</sub> ) <sub>2</sub> ( <b>1</b> ).                                                                                                                                                                               | S37     |
| <b>Table S5.</b> Positional and Equivalent Isotropic Thermal Parameters for [Fe <sup>II</sup> (tame-(N <sub>2</sub> S(py) <sub>2</sub> ) <sub>2</sub> )] <sub>2</sub> (BPh <sub>4</sub> ) <sub>2</sub> ( <b>1</b> ).                                                                                                                                     | S38-S39 |
| <b>Table S6</b> Bond Distances (Å) and Angles (deg) for [Fe <sup>II</sup> (tame-(N <sub>2</sub> S(py) <sub>2</sub> ) <sub>2</sub> )] <sub>2</sub> (BPh <sub>4</sub> ) <sub>2</sub> ( <b>1</b> ).                                                                                                                                                         | S40-S45 |
| <b>Table S7</b> Anisotropic Thermal Parameters for [Fe <sup>II</sup> (tame-(N <sub>2</sub> S(py) <sub>2</sub> ) <sub>2</sub> )] <sub>2</sub> (BPh <sub>4</sub> ) <sub>2</sub> ( <b>1</b> ).                                                                                                                                                              | S46-S47 |
| <b>Table S8</b> Hydrogen Atoms for [Fe <sup>II</sup> (tame-(N <sub>2</sub> S(py) <sub>2</sub> ) <sub>2</sub> )] <sub>2</sub> (BPh <sub>4</sub> ) <sub>2</sub> ( <b>1</b> ).                                                                                                                                                                              | S48     |
| <b>Table S9.</b> Crystal Data for [Fe <sup>II</sup> (tame-(N <sub>2</sub> S(quino) <sub>2</sub> ) <sub>2</sub> )] <sub>2</sub> (BPh <sub>4</sub> )•3MeCN •Et <sub>2</sub> O ( <b>2</b> ).                                                                                                                                                                | S49     |
| <b>Table S10.</b> Positional and Equivalent Isotropic Thermal Parameters for [Fe <sup>II</sup> (tame-(N <sub>2</sub> S(quino) <sub>2</sub> ) <sub>2</sub> )] <sub>2</sub> (BPh <sub>4</sub> )•3MeCN •Et <sub>2</sub> O ( <b>2</b> ).                                                                                                                     | S50-S51 |
| <b>Table S11.</b> Bond Distances (Å) and Angles (deg) for [Fe <sup>II</sup> (tame(N <sub>2</sub> S(quino) <sub>2</sub> ) <sub>2</sub> )] <sub>2</sub> (BPh <sub>4</sub> )•3MeCN •Et <sub>2</sub> O ( <b>2</b> ).                                                                                                                                         | S52-S62 |
| <b>Table S12.</b> Anisotropic Thermal Parameters for [Fe <sup>II</sup> (tame(N <sub>2</sub> S(quino) <sub>2</sub> ) <sub>2</sub> )] <sub>2</sub> (BPh <sub>4</sub> )•3MeCN •Et <sub>2</sub> O ( <b>2</b> ).                                                                                                                                              | S63-S65 |
| <b>Table S13.</b> Hydrogen Atoms for [Fe <sup>II</sup> (tame(N <sub>2</sub> S(quino) <sub>2</sub> ) <sub>2</sub> )] <sub>2</sub> (BPh <sub>4</sub> )•3MeCN •Et <sub>2</sub> O ( <b>2</b> ).                                                                                                                                                              | S66-S68 |
| <b>Table S14.</b> Crystal Data for [Fe <sup>II</sup> (tame-(N <sub>2</sub> S( <sup>Me</sup> Im) <sub>2</sub> ) <sub>2</sub> )] <sub>2</sub> (PF <sub>6</sub> ) <sub>2</sub> •2MeCN ( <b>3</b> ).                                                                                                                                                         | S69     |
| <b>Table S15.</b> Positional and Equivalent Isotropic Thermal Parameters for [Fe <sup>II</sup> (tame-(N <sub>2</sub> S( <sup>Me</sup> Im) <sub>2</sub> ) <sub>2</sub> )] <sub>2</sub> (PF <sub>6</sub> ) <sub>2</sub> •2MeCN ( <b>3</b> ).                                                                                                               | S70-S71 |

|                                                                                                                                                                                                                                                   |           |
|---------------------------------------------------------------------------------------------------------------------------------------------------------------------------------------------------------------------------------------------------|-----------|
| <b>Table S16.</b> Bond Distances (Å) and Angles (deg) for $[\text{Fe}^{\text{II}}(\text{tame}(\text{N}_2\text{S}^{\text{Me}}\text{Im})_2)]_2(\text{PF}_6)_2 \cdot 2\text{MeCN}$ ( <b>3</b> ).                                                     | S72-S84   |
| <b>Table S17.</b> Anisotropic Thermal Parameters for $[\text{Fe}^{\text{II}}(\text{tame}(\text{N}_2\text{S}^{\text{Me}}\text{Im})_2)]_2(\text{PF}_6)_2 \cdot 2\text{MeCN}$ ( <b>3</b> ).                                                          | S85-S87   |
| <b>Table S18.</b> Hydrogen Atoms for $[\text{Fe}^{\text{II}}(\text{tame}(\text{N}_2\text{S}^{\text{Me}}\text{Im})_2)]_2(\text{PF}_6)_2 \cdot 2\text{MeCN}$ ( <b>3</b> ).                                                                          | S88-S89   |
| <b>Table S19.</b> Crystal Data for $[\text{Co}^{\text{II}}(\text{tame}(\text{N}_2\text{S}^{\text{Me}}\text{Im})_2)]_2(\text{PF}_6)_2 \cdot 2\text{MeCN}$ ( <b>4</b> ).                                                                            | S90       |
| <b>Table S20.</b> Positional and Equivalent Isotropic Thermal Parameters for $[\text{Co}^{\text{II}}(\text{tame}(\text{N}_2\text{S}^{\text{Me}}\text{Im})_2)]_2(\text{PF}_6)_2 \cdot 2\text{MeCN}$ ( <b>4</b> ).                                  | S91-S93   |
| <b>Table S21.</b> Bond Distances (Å) and Angles (deg) for $[\text{Co}^{\text{II}}(\text{tame}(\text{N}_2\text{S}^{\text{Me}}\text{Im})_2)]_2(\text{PF}_6)_2 \cdot 2\text{MeCN}$ ( <b>4</b> ).                                                     | S94-S104  |
| <b>Table S22.</b> Anisotropic Thermal Parameters for $[\text{Co}^{\text{II}}(\text{tame}(\text{N}_2\text{S}^{\text{Me}}\text{Im})_2)]_2(\text{PF}_6)_2 \cdot 2\text{MeCN}$ ( <b>4</b> ).                                                          | S105-S107 |
| <b>Table S23.</b> Hydrogen Atoms for $[\text{Co}^{\text{II}}(\text{tame}(\text{N}_2\text{S}^{\text{Me}}\text{Im})_2)]_2(\text{PF}_6)_2 \cdot 2\text{MeCN}$ ( <b>4</b> ).                                                                          | S108-S109 |
| <b>Table S24.</b> Crystal Data for $[\text{Fe}^{\text{II}}(\text{tame}(\text{N}_2\text{S}^{\text{Bz}}(\text{Me}^{\text{e}}\text{Im})_2(\text{MeCN})))_2(\text{PF}_6)_2 \cdot \text{MeCN}$ ( <b>5</b> ).                                           | S110      |
| <b>Table S25.</b> Positional and Equivalent Isotropic Thermal Parameters for $[\text{Fe}^{\text{II}}(\text{tame}(\text{N}_2\text{S}^{\text{Bz}}(\text{Me}^{\text{e}}\text{Im})_2(\text{MeCN})))_2(\text{PF}_6)_2 \cdot \text{MeCN}$ ( <b>5</b> ). | S111-S112 |
| <b>Table S26.</b> Bond Distances (Å) and Angles (deg) for $[\text{Fe}^{\text{II}}(\text{tame}(\text{N}_2\text{S}^{\text{Bz}}(\text{Me}^{\text{e}}\text{Im})_2(\text{MeCN})))_2(\text{PF}_6)_2 \cdot \text{MeCN}$ ( <b>5</b> ).                    | S113-S120 |

**Experimental.**

**General Methods** Sodium azide, 1-hydroxybenzotriazole (HOBT), dicyclohexylcarbodiimide, 3,3'-aminopropylamine, di-tert-butyl dicarbonate, 2-(tert-butoxycarbonylamino)isobutyric acid, iron(II) acetate, iron(II) chloride, and tetraphenyl phosphonium chloride were all purchased from TCI and used as received. DMSO-*d*<sub>6</sub> and CDCl<sub>3</sub> were purchased from Cambridge Isotope Labs and used as received. Ethanol was purchased from Decon and degassed prior to use. Diethyl ether was purchased from Fischer Scientific and purified using a solvent purification columns housed in a custom stainless steel cabinet and dispensed by a stainless steel Schlenk-line (GlassContour). All other solvents were purchased from Sigma Aldrich. MeOH, MeCN and CH<sub>2</sub>Cl<sub>2</sub> were dried and distilled prior to use. A 48% aqueous solution of hydrobromic acid was purchased from Alfa-Aesar and used as received. Ammonia was obtained from Praxair while all other material was purchased and used as received from Sigma Aldrich.

<sup>1</sup>H NMR spectra were obtained on a Bruker AV300, AV301, DRX499, or AV500. Chemical shifts are listed in parts per million and were reported relative the residual protio solvent. UV/Vis spectra were recorded on a Varian Cary 50 spectrophotometer equipped with a fiber optic cable connected to a “dip” ATR probe (C-technologies). A custom-built two neck solution sample holder equipped with a threaded glass connector was sized specifically to fit the “dip” probe. Mass spec data was collected on either a Bruker Esquire LC-Ion Trap Electrospray ionization mass spectrometer (ESI-MS), or a LTQ ion trap mass spectrometer equipped with an HP 1100 capillary inlet. Cyclic voltammograms

were recorded in MeCN (0.1M  $n\text{Bu}_4\text{N}[\text{PF}_6]$  supporting electrolyte) on a PAR 263A potentiostat utilizing a glassy carbon working electrode, platinum auxiliary electrode and an  $\text{Ag}^+/\text{AgNO}_3$  reference electrode. X-ray crystallographic data was recorded on a Bruker APEX II single crystal X-ray diffractometer using Mo-radiation. Elemental analysis were performed by Atlantic Microlab, Inc. Norcross, Ga.

All manipulations were performed using Schlenk techniques or under a  $\text{N}_2$  atmosphere in a glovebox. The synthesis of 2-bromomethyl-2-methyl-propane-1,3-diol (**B**, Scheme S1), and 2-benzylsulfanyl methyl-2-methyl-propane-1,3-diol (**C**, Scheme S1) were carried out using a modified literature procedure.<sup>1</sup>

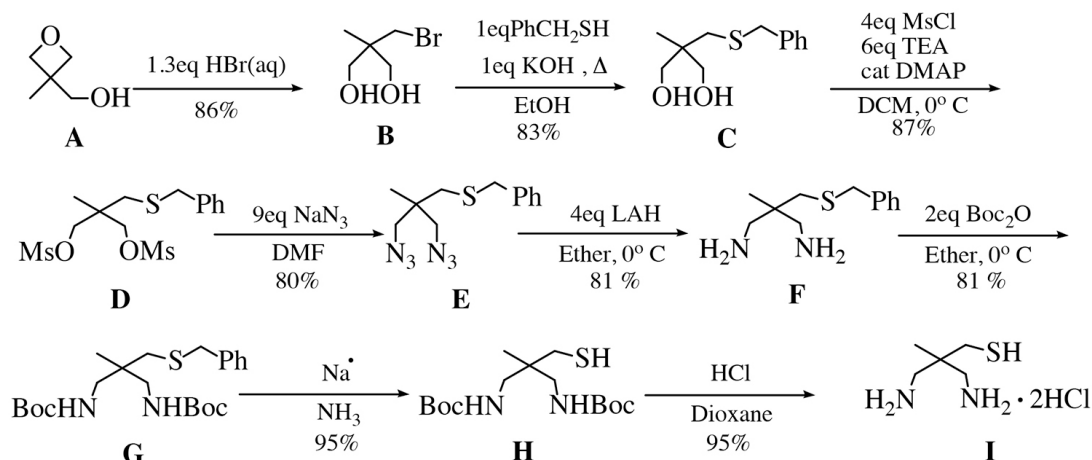

**Scheme S1.**

**Synthesis of (3-methanesulfonyl-2-methanesulfonylmethyl-2-methyl-propylsulfanylmethyl)-benzene (D).** Methanesulfonyl chloride (18.2 g, 159 mmol) was added dropwise to a  $\text{CH}_2\text{Cl}_2$  (375 mL) solution containing **C** (Scheme S1) 9.0 g, 39.8 mmol,<sup>1</sup> triethylamine (24.1 g, 239 mmol) and a catalytic amount

of 4-dimethylaminopyridine (200-300 mg) at 0°C. The orange solution was monitored by TLC through the disappearance of the starting material. The reaction was then allowed to warm to room temperature. Water (300 mL) was added to the solution and extracted with CH<sub>2</sub>Cl<sub>2</sub> (2 x 300 mL), the combined organics were washed with water and brine (2 x 100 mL each) prior to drying with sodium sulfate. Solvents were removed *in vacuo* and the orange oil was purified to an off yellow oil by column chromatography (1:1 ethyl acetate:hexanes) in 87% yield. <sup>1</sup>H NMR (300 MHz, CDCl<sub>3</sub>) δ 7.33 (m, 5H), 4.07 (d, <sup>2</sup>J 9 Hz, 4H), 3.75 (s, 2H), 3.01 (s, 6H), 2.53 (s, 2H), 1.08 (s, 3H). ESI-MS: expected *m/z* for C<sub>14</sub>H<sub>22</sub>O<sub>6</sub>S<sub>3</sub>= 382.1 found *m/z*= 382.1.

**Synthesis of (3-azido-2-azidomethyl-2-methyl-propylsulfanylmethyl)-benzene (E).** (3-methanesulfonyl-2-methanesulfonylmethyl-2-methyl-propylsulfanylmethyl)-benzene (**D**) (8.0 g, 21 mmol) was added to a solution of sodium azide (12.3 g, 189 mmol) in DMF (130 mL) and refluxed for 3 days. After cooling to room temperature, water (130 mL) was added and the organics were extracted with ethyl acetate (3x 200 mL). The combined organics were combined and washed water and brine (2 x 200 mL each) wherein the reaction mixture was dried with sodium sulfate. The solvent was removed *in vacuo* and the resulting yellow oil was purified by silica gel column chromatography (4:1 hexanes:ethyl acetate) to yield (**E**) as an off white oil in 80% yield. <sup>1</sup>H NMR (300 MHz, CDCl<sub>3</sub>) δ 7.34 (m, 5H), 3.74 (s, 2H), 3.29 (d, <sup>2</sup>J 9 Hz, 4H), 2.44 (s, 2H), 0.98 (s, 3H).

**Synthesis of 2-benzylsulfanylmethyl-2-methyl-propane-1,3-diamine (F).** (3-azido-2-azidomethyl-2-methyl-propylsulfanylmethyl)-benzene (**E**, Scheme S1) (2.0 g, 7.2 mmol) was added drop wise to a stirred solution of lithium aluminum hydride (LAH) (1.1 g, 28.8 mmol) in ether (150 mL) at 0°C. Once the reaction was complete water was added slowly to quench the excess LAH. The reaction was then filtered through Celite and dried with sodium sulfate. The ether was removed *in vacuo* and the clear oil was placed in an aqueous solution (10 mL) and acidified to pH 2.0. The aqueous solution was washed with ether (3 x 20 mL) before being basified to pH 12.0. The product was then extracted ether (3 x 40 mL). The combined organics were dried with sodium sulfate and then removed *in vacuo* to yield (**F**) as a clear oil in 51% yield. <sup>1</sup>H NMR (300 MHz, CDCl<sub>3</sub>) δ 7.32 (m, 5H), 3.70 (s, 2H), 2.55 (s, 4H), 2.44 (s, 2H), 0.86 (s, 3H). ESI-MS: expected *m/z* for C<sub>12</sub>H<sub>20</sub>N<sub>2</sub>S= 224.1, found *m/z*=225.1.

**Synthesis of 2-benzylsulfanylmethyl-2-methyl-propane-1,3-(tert-Butyloxycarbonyl) diamine (G).** 2-benzylsulfanylmethyl-2-methyl-propane-1,3-diamine (**F**) (4.7 g, 20 mmol) was dissolved in 50 ml of dichloromethane and cooled to 0°C. Di-*tert*-butyl dicarbonate (9.1 g, 40 mmol) was dissolved in 10 mL of dichloromethane and added dropwise to the solution of **F**. This solution was allowed to warm to room temperature overnight. The solution was washed 2x with brine (50 mL) and dried over Na<sub>2</sub>SO<sub>4</sub>. Volatiles were removed *in vacuo* to afford **G** as a white solid in 95% yield (8.1 g) <sup>1</sup>H NMR (300 MHz, CDCl<sub>3</sub>) δ 7.33 (m, 5H), 5.03 (bs, 2H), 3.69 (s, 2H), 3.048 (*dd*, <sup>3</sup>*J* 7.5 Hz, <sup>2</sup>*J* 14.7 Hz, 2H), 2.80



(*dd*,  $^3J$  6.3 Hz,  $^2J$  14.9 Hz 2H), 2.35 (s, 2H), 1.44 (s, 18H), 0.86 (s, 3H). ESI-MS: expected  $m/z$  for  $C_{22}H_{36}N_2O_4S$  = 424.1, found  $m/z$  = 425.1

**Synthesis of 2-thiomethyl-2-methyl-propane-1,3-(*tert*-Butyloxycarbonyl) diamine (H).** To a stirred solution of liquid ammonia (50 mL) cooled to  $-78^\circ\text{C}$ , was added sodium metal (200 mg). 2.9 g (6.8 mmol) of **G** (Scheme S1) was added in 0.3g amounts. Additional sodium was periodically added in small proportions to maintain the deep blue color. The completion of the reaction was assumed once the solution maintained its deep blue color for more than 1 h. Ammonium chloride was added until the solution changed from blue to yellow, thus quenching the sodium. The liquid ammonia was evaporated under a stream of  $N_2$ . A 50 mL, 0.025M  $K_2HPO_4$  and 0.025M  $NaH_2PO_4$  aqueous solution was then added and the reaction was acidified with 37% HCl until the reaction reached a pH of 2. The organic product was extracted with dichloromethane (4 x 75 mL). The organics were then dried with  $Na_2SO_4$  and the volatiles were removed to afford **H** as a foul smelling oil in 93% yield (2.1 g)  $^1H$  NMR (300 MHz,  $CDCl_3$ )  $\delta$  5.26 (bs, 2H), 3.00 (*m*, 4H), 2.41 (d,  $^3J$  9 Hz 2H), 1.66 (t,  $^3J$  9 Hz 1H), 1.46 (s, 18H) 0.89 (s, 3H). ESI-MS: expected  $m/z$  for  $C_{15}H_{30}N_2O_4S$  = 334.1, found  $m/z$  = 335.1

**Synthesis of 2-thiomethyl-2-methyl-propane-1,3-diamine dihydrogenchloride (I).** 5 mL of 4M HCl in dioxane was added to Boc-protected **H** (2.1g, 6.4 mmol) in 2mL of methanol. Gas evolution was observed and the solution was allowed to stir overnight. The volatiles were removed *in vacuo* to afford **I**, tame- $N_2S \cdot 2HCl$ , as a white solid in 95% yield (1.2 g)  $^1H$  NMR (300 MHz,

$d_6$ -DMSO)  $\delta$  8.12 (bs, 5H, NH<sub>2</sub>), 2.91 (bs, 4H), 2.65 (s, 2H), 1.02 (s, 3H). ESI-MS: expected  $m/z$  for C<sub>5</sub>H<sub>16</sub>Cl<sub>2</sub>N<sub>2</sub>S= 207.1, found  $m/z$ =135.1 (expected minus 2 HCl)

**Synthesis of [Fe<sup>II</sup>(tame-(N<sub>2</sub>S(py))<sub>2</sub>)]<sub>2</sub>(PF<sub>6</sub>)<sub>2</sub> (1).** 2-thiomethyl-2-methylpropane-1,3-diamine dihydrogenchloride (I) (0.2 g, 1mmol) was added to a vial containing a stirred solution of sodium methoxide (0.156g, 3mmol) in 10 mL of methanol. 2-pyridinecarboxaldehyde (0.21 g, 2mmol) was then added and the stirred suspension was cooled to -40° C. In a separate vial iron (II) chloride dissolved in 5 mL of methanol and cooled to -40° C. The iron solution was then slowly added to the organic solution. Immediately, the solution became a deep turquoise color. This was stirred for 1h at which time sodium hexafluorophosphate (0.168 g, 1 mmol) was added. This solution was stirred overnight at which time a dark solid precipitated was observed. The methanol was removed *in vacuo*, and the resulting solid was dissolved in acetonitrile, and filtered through celite. The deep turquoise solution was concentrated to a minimal volume (~2 mL) upon which ether was layered to isolate a deep blue solid in 70% yield (360 mg). Electronic absorption spectrum:  $\lambda_{max}$  (nm) ( $\epsilon$  (M<sup>-1</sup>cm<sup>-1</sup>): (MeCN): 420 (6,150), 580 (9,100), and 650 (11,800)). <sup>1</sup>H NMR (300 MHz,  $d_3$ -MeCN)  $\delta$  9.3 (s, 1H), 9.00 (s, 1H), 8.97 (s, 1H) 8.15, (m, 3H), 7.75 (t <sup>3</sup>J 7.5 Hz, 1H), 7.45 (m, 2H), 7.09 (t <sup>3</sup>J 7 Hz, 1H), 4.14 (d <sup>2</sup>J 12.7 Hz, 1H) 3.77 (m, 3H), 1.04 (s, 3H), 0.90 (d, <sup>2</sup>J 13.3 Hz 1H), 0.31 (d <sup>2</sup>J 13.4 Hz, 1H); <sup>13</sup>C NMR (500 MHz, MeCN- $d_3$ )  $\delta$  169.2 (s, 2C), 168.5 (s, 2C), 160.2 (s, 2C), 158.9 (s, 2C), 154.4 (s, 2C), 153.3 (s, 2C), 136.9 (s, 2C), 136.1 (s, 2C) 128.8 (s, 2C), 128.1 (s, 2C),

125.4 (s, 2C), 125.2 (s, 2C), 69.0 (s, 2C), 67.0 (s, 2C), 43.4 (s, 2C), 26.6 (s, 2C), 24.8 (s, 2C) ESI-MS: expected  $m/z$  for  $[C_{34}H_{38}N_8S_2Fe_2]^{2+} = 367.1$ , found  $m/z=367.1$  Elemental Analysis for  $C_{34}H_{38}F_{12}N_8P_2S_2Fe_2$  Calculated: C, 39.86; H, 3.74; N, 10.94. Found C, 39.28; H, 3.73; N; 10.80.

**Synthesis of  $[Fe^{II}(\text{tame}-(N_2S(\text{py})_2)]_2(BPh_4)_2$ :** The tetraphenylborate salt of **1** was prepared using the method described above for the  $PF_6^-$  salt, except the 1 mmol of  $NaPF_6$  was replaced with 1 mmol of  $NaBPh_4$ . Crystals with were grown by layering MeOH onto a MeCN solution. ESI-MS: expected  $m/z$  for  $[C_{34}H_{38}N_8S_2Fe_2]^{2+} = 367.1$ , found  $m/z=367.1$ . Electronic absorption spectrum:  $\lambda_{max}$  (nm) ( $\epsilon$  ( $M^{-1}cm^{-1}$ ): (MeCN): 420 (6,150), 580 (9,100), and 650 (11,800)).

**Synthesis of  $[Fe^{II}(\text{tame}-(N_2S(\text{quino})_2)]_2(PF_6)_2$  (**2**).** Complex **2** was synthesized using a procedure analogous to that of **1**. A deep blue solid was isolated by layering ether onto a concentrated solution of **2** in DCM in 67% yield.  $\lambda_{max}$  (nm) ( $\epsilon$  ( $M^{-1}cm^{-1}$ ): (MeCN): 420 (6,240), 607 (14,830), and 719 (19,500)).  $^1H$  NMR (300 MHz, MeCN- $d_3$ )  $\delta$  9.81 (s, 2H), 8.30 (d  $^2J$  8.5 Hz, 2H), 8.06 (d  $^2J$  8.4 Hz, 2H), 7.90 (d  $^2J$  7.8 Hz, 2H), 7.58 (t  $^3J$  7.4 Hz, 2H), 7.47 (t  $^3J$  7.7hz, 2H), 6.50 (d  $^2J$  8.3 Hz, 2H), 4.77 (d  $^2J$  15.1 Hz, 2H) 3.87 (d  $^2J$  15.1 Hz, 3H), 0.67 (s, 3H), 0.00 (s, 2H) ESI-MS: expected  $m/z$  for  $[C_{50}H_{46}N_8S_2Fe_2]^{2+} = 467.1$ , found  $m/z = 467.1$ . Elemental Analysis for  $C_{50}H_{46}F_{12}N_8P_2S_2Fe_2CH_2Cl_2$  Calculated: C, 46.77; H, 3.69; N, 8.56. Found C, 46.85; H, 3.73; N; 8.11.

**Synthesis of  $[Fe^{II}(\text{tame}-(N_2S(\text{quino})_2)]_2(BPh_4)_2$  (**2-BPh<sub>4</sub>**).** The tetraphenylborate salt of **2** was prepared using the method described above for the  $PF_6^-$  salt, except the 1 mmol of  $NaPF_6$  was replaced with 1 mmol of  $NaBPh_4$ .

Crystals were grown via slow vapor diffusion of Et<sub>2</sub>O into a MeCN solution. Electronic absorption spectrum:  $\lambda_{\max}$  (nm) ( $\epsilon$  (M<sup>-1</sup>cm<sup>-1</sup>): (MeCN): 420 (6,240), 607 (14,830), and 719 (19,500)). ESI-MS: expected  $m/z$  for [C<sub>50</sub>H<sub>46</sub>N<sub>8</sub>S<sub>2</sub>Fe<sub>2</sub>]<sup>2+</sup>= 467.1, found  $m/z$ =467.1.

**Synthesis of [Fe<sup>II</sup>(tame-(N<sub>2</sub>S<sup>Me</sup>Im)<sub>2</sub>)]<sub>2</sub>(PF<sub>6</sub>)<sub>2</sub>•2MeCN (3).** Complex **2** was synthesized using the same procedure used to prepare **1**, except 1-methyl-2-imidazolecarboxaldehyde was used in place of 2-pyridinecarboxaldehyde. A royal blue solid was obtained in 85% yield from layering of ether onto a concentrated volume of acetonitrile. Crystals were isolated via slow diffusion of ether into a concentrated solution of acetonitrile. Electronic absorption spectrum dimeric **3**:  $\lambda_{\max}$  ( $\epsilon$  (M<sup>-1</sup>cm<sup>-1</sup>): (MeCN): 619(12,400); (MeOH) 595(4,600) nm. Electronic absorption spectrum monomeric **3**:  $\lambda_{\max}$  ( $\epsilon$  (M<sup>-1</sup>cm<sup>-1</sup>): (MeCN): 619 (6,100) nm. Magnetic moment (solution MeCN-*d*<sub>3</sub> 298 K)= 2.89  $\mu_B$ . ESI-MS: expected  $m/z$  for [C<sub>30</sub>H<sub>43</sub>N<sub>12</sub>S<sub>2</sub>Fe<sub>2</sub>]<sup>2+</sup>= 373.5, found  $m/z$ =373.1 Elemental Analysis for C<sub>30</sub>H<sub>42</sub>F<sub>12</sub>N<sub>12</sub>P<sub>2</sub>S<sub>2</sub>Fe<sub>2</sub>CH<sub>3</sub>CN Calculated: C, 35.67; H, 4.21; N, 16.90. Found C, 35.57; H, 4.14; N; 16.74.

**Synthesis of [Co<sup>II</sup>(tame-(N<sub>2</sub>S<sup>Me</sup>Im)<sub>2</sub>)]<sub>2</sub>(PF<sub>6</sub>)<sub>2</sub>•2MeCN (4).** The tripodal thiolate bis-amine ligand **I** (Scheme S1, 0.2 g, 1 mmol) was added to a vial containing a stirred solution of sodium methoxide (0.156 g, 3 mmol) in 10ml of methanol. 1-methyl-2-imidazolecarboxaldehyde (0.21 g, 2 mmol) was then added and the stirred suspension was cooled to -40° C. In a separate vial cobalt (II) chloride was dissolved in 5 mL of MeOH and cooled to -40° C. The cobalt

solution was then slowly added to the organic solution. This was stirred for 1h, at which time sodium hexafluorophosphate (0.168 g, 1 mmol) was added. This solution was stirred overnight at which time an orange precipitate was observed. The MeOH was removed *in vacuo* and the solid was dissolved in MeCN, and filtered through celite. The MeCN was removed to a minimal volume and layered with Et<sub>2</sub>O to isolated a red powder in 93% yield (265 mg). A slow layered diffusion of Et<sub>2</sub>O into MeCN afforded X-ray quality crystals of **4**.  $\lambda_{\max}$  (nm) ( $\epsilon$  (M<sup>-1</sup>cm<sup>-1</sup>)): (MeCN): 385(2100), 512 sh (654). Magnetic moment (solution, MeCN-*d*<sub>3</sub>, 298K)= 3.98  $\mu_B$ /Co. ESI-MS: expected  $m/z$  for [C<sub>30</sub>H<sub>43</sub>N<sub>12</sub>S<sub>2</sub>Co<sub>2</sub>]<sup>2+</sup>= 376.1, found  $m/z$  = 376.2. Elemental Analysis for C<sub>30</sub>H<sub>43</sub>F<sub>12</sub>N<sub>12</sub>P<sub>2</sub>S<sub>2</sub>Co<sub>2</sub> Calculated: C, 34.56; H, 4.06; N, 16.12. Found: C, 34.41; H, 4.04; N; 15.95.

**Synthesis of [Fe<sup>II</sup>(tame-(N<sub>2</sub>S<sup>Bz</sup>(MeIm)<sub>2</sub>(MeCN)))]<sup>+</sup> (**5**).** 2-benzylsulfanylmethyl-2-methyl-propane-1,3-diamine (**6**) (0.1 g, 0.44 mmol) was added to a vial and dissolved in 8 mL of MeOH. 1-methyl-2-imidazolecarboxaldehyde (0.1 g, 0.88 mmol) was then added and the solution was cooled to -40° C. In a separate vial iron (II) chloride (0.055 g, 0.44 mmol) was dissolved in 3 ml of MeOH and cooled to -40° C. The iron solution was then slowly added to the organic solution. Immediately, the solution became red. This was stirred for 1h at which time sodium hexafluorophosphate (0.148 g, 0.88 mmol) was added. The MeOH was removed *in vacuo* and the resulting solid was dissolved in MeCN and filtered through celite. The red solution was concentrated to a minimal volume (2 mL) upon which Et<sub>2</sub>O was layered to isolate a deep red solid in 45% yield (150 mg).  $\lambda_{\max}$  (nm) ( $\epsilon$  (M<sup>-1</sup>cm<sup>-1</sup>)): (MeCN): 512(2850). Magnetic moment (solution, MeCN-

$d_3$ , 298K)= 5.04 $\mu_B$ . Elemental Analysis for C<sub>24</sub>H<sub>31</sub>F<sub>12</sub>N<sub>7</sub>P<sub>2</sub>SFe Calculated: C, 36.24; H, 3.93; N, 12.33. Found: C, 35.74; H, 3.97; N, 12.41.

**Computational Methods.** All calculations were performed using the ORCA quantum chemistry package developed by Neese and coworkers.<sup>2</sup> All calculations employed the def2-TZVP(-f) basis set and the def2-TZVP/J auxiliary basis set for Coulomb fitting, the atom-pairwise dispersion correction of Grimme (D3BJ),<sup>3,4</sup> and tight convergence criteria were required for the SCF solutions. All calculations used the Grid5 (GridX5) integration grid size, the zeroth-order regular approximation (ZORA),<sup>5</sup> and the conductor-like screening model (COSMO) with acetonitrile as a solvent.<sup>6</sup> Geometries were optimized for all complexes using the BP86 functional with the resolution of the identity (RI) approximation,<sup>7,8</sup> and initiated from crystallographic coordinates when available. The calculation was converged to tight optimization criteria. Selected calculations employed the broken-symmetry formalism to model coupled paramagnetic sites. For the calculation of <sup>57</sup>Fe Mössbauer parameters, the specialized core properties basis set (CP-PPP) with an integration grid of 7 was selected for Fe. The quadrupole splitting parameters were obtained from the output of the calculation, and the calculated isomer shifts were determined using the calibration study of Römelt et al.<sup>9</sup> Time-dependent DFT (TD-DFT) calculations utilized the same parameters but with the CAM-B3LYP<sup>10</sup> range-separated hybrid density functional and the RI chain-of-spheres (RIJCOSX) approximation.<sup>11,12</sup> Calculation of the electronic absorption and sulfur K-edge X-ray absorption spectra were performed by selecting all available donors and

acceptors or by localizing the donor space to the 1s orbitals of sulfur, respectively.<sup>13</sup> A Gaussian broadening of 3200 cm<sup>-1</sup> (respectively 0.5 eV) full width at half max was applied to the discrete transition moments. Molecular orbital isosurfaces and transition difference densities were visualized using UCSF Chimera.<sup>14</sup>

**<sup>57</sup>Fe Mössbauer Spectroscopy.** Mössbauer spectra were recorded in transmission mode with a constant-acceleration Wissel Mössbauer spectrometer, with a <sup>57</sup>Co source in a Rh matrix and a Janis closed-cycle He cryostat operating at 80 K. Samples were anaerobically prepared by grinding crystalline solid into a powder using a mortar and pestle. The powder was then sealed in a shallow Teflon cup. Isomer shifts are reported in mm/s and referenced to iron metal at room temperature. Quadrupole splittings are also reported in mm/s. Experimental data were simulated and fit using the Mfit program.<sup>15</sup>

**Sulfur K-Edge X-Ray Absorption Spectroscopy.** All the compounds used for S K-edge X-ray Absorption Spectroscopy (XAS) measurements were powders diluted in BN, within a 1:1 ratio. The powders were finely ground using a mortar and pestle, attached to an aluminum plate with double-sided carbon tape and covered with a 5 µm thick polypropylene foil. Sulfur K-Edge XAS experiments were performed at undulator beam line ID26 at the European Synchrotron Radiation Facility (ESRF), Grenoble France. ESRF is a 6 GeV storage ring, providing 200 mA electron beam current in a decay mode. A flat double crystal Si(111) monochromator was employed to select the energy of the incoming X-ray photons, giving an intrinsic resolution  $\Delta E/E$  of about 10<sup>-4</sup>. The X-

rays beam size was 250  $\mu\text{m}$  (H) x 50  $\mu\text{m}$  (V). The XAS measurements were performed in total fluorescence (TFY) mode, using a Si PIN diode to collect the fluorescent X-ray photons. In order to minimize the scattering contribution to the obtained signal, the sample was positioned at the angle of  $\sim 45^\circ$  degrees to the incident photon beam. The measurements were done at room temperature in a vacuum environment of about  $10^{-6}$  mbar.<sup>16</sup> Two consecutive scans were obtained and averaged for each compound in order to obtain reasonable signal-to-noise ratios. The acquisition time for each of the XAS scans, collected in the range 2450-2550 eV range, was 60 seconds. No sign of radiation induced damage was observed over the acquisition time. The energy of the incident photons was calibrated using the spectrum of elemental sulfur, setting the energy of the first edge feature to 2472 eV.<sup>17</sup> Data were background corrected and normalized using the Athena package,<sup>18</sup> by fitting a second-order polynomial to the pre- and post-edge regions and setting the edge jump to unity. The full range of the normalized spectra is shown in Figure S12.

**X-ray Crystallographic Structure Determination.** A dark green prism of  $[\text{Fe}^{\text{II}}(\text{tame}-(\text{N}_2\text{S}(\text{py})_2)]_2(\text{BPh}_4)_2$  (**1-BPh<sub>4</sub>**), measuring 0.34 x 0.22 x 0.22 mm<sup>3</sup> was mounted on a glass capillary needle with oil and frozen at  $-143^\circ\text{C}$  under a stream of cold nitrogen. Data was collected on a Nonius Kappa CCD X-ray diffractometer, with Mo-radiation. The crystal-to-detector distance was 30 mm and exposure time was 30 seconds per degree for all sets. The scan width was  $1.5^\circ$ . The data collection was 95% complete to  $23.26^\circ$  in  $\theta$ . A total of 9273 reflections were collected covering the indices,  $h = -26$  to 22,  $k = -23$  to 23,  $l = -27$  to 27. Of these, 5042 were symmetry independent, and the  $R_{\text{int}} = 0.1378$



indicated that the data was of less than average quality (0.07). Indexing and unit cell refinement indicated an orthorhombic P lattice in the space group  $P_{bcn}$  (No. 60).

A lustrous green prism of  $[\text{Fe}^{\text{II}}(\text{tame}-(\text{N}_2\text{S}(\text{quino})_2)]_2(\text{BPh}_4) \cdot 2\text{MeCN} \cdot \text{Et}_2\text{O}$  (**2-BPh<sub>4</sub>**), measuring  $0.20 \times 0.15 \times 0.13 \text{ mm}^3$  was mounted on a loop with oil. Data was collected at  $-173 \text{ }^\circ\text{C}$  on a Bruker APEX II single crystal X-ray diffractometer with Mo-radiation. The crystal-to-detector distance was 40 mm and exposure time was 10 seconds per frame for all sets. The scan width was  $0.5^\circ$ . Data collection was 100% complete to  $25^\circ$  in  $\vartheta$ . A total of 128992 reflections were collected covering the indices,  $h = -18$  to 18,  $k = -18$  to 18,  $l = -19$  to 19. 11639 reflections were symmetry independent and the  $R_{\text{int}} = 0.0287$  indicated that the data was of better than average quality (0.07). Indexing and unit cell refinement indicated a triclinic lattice. The space group was found to be  $P\bar{1}$  (No. 2).

A blue crystal of  $[\text{Fe}^{\text{II}}(\text{tame}-(\text{N}_2\text{S}(\text{MeIm})_2)]_2(\text{PF}_6)_2 \cdot 2\text{MeCN}$  (**3**), measuring  $0.10 \times 0.05 \times 0.05 \text{ mm}^3$ , was mounted on a loop with oil. Data was collected at  $-173 \text{ }^\circ\text{C}$  on a Bruker APEX II single crystal X-ray diffractometer, Mo-radiation. Crystal-to-detector distance was 40 mm and exposure time was 30 seconds per frame for all sets. The scan width was  $0.5^\circ$ . Data collection was 99.9% complete to  $25^\circ$  in  $\vartheta$ . A total of 50076 reflections were collected covering the indices,  $h = -19$  to 19,  $k = -20$  to 20,  $l = -21$  to 20. 14435 reflections were symmetry independent and the  $R_{\text{int}} = 0.0608$  indicated that the data was of slightly better than average quality (0.07). Indexing and unit cell refinement indicated a triclinic lattice. The space group was found to be  $P\bar{1}$  (No. 2).

A red crystal of  $[\text{Co}^{\text{II}}(\text{tame}-(\text{N}_2\text{S}^{\text{Me}}\text{Im})_2)]_2(\text{PF}_6)_2 \cdot 2\text{MeCN}$  (**4**), measuring  $0.15 \times 0.05 \times 0.05 \text{ mm}^3$  was mounted on a loop with oil. Data was collected at  $-173^\circ\text{C}$  on a Bruker APEX II single crystal X-ray diffractometer, Mo-radiation. Crystal-to-detector distance was 40 mm and exposure time was 5 seconds per frame for all sets. The scan width was  $0.5^\circ$ . Data collection was 99.9% complete to  $25^\circ$  in  $\vartheta$ . A total of 107396 reflections were collected covering the indices,  $h = -15$  to 15,  $k = -18$  to 18,  $l = -25$  to 25. 15125 reflections were symmetry independent and the  $R_{\text{int}} = 0.0643$  indicated that the data was of better than average quality (0.07). Indexing and unit cell refinement indicated a triclinic lattice. The space group was found to be  $P\bar{1}$  (No. 2).

A purple block of  $[\text{Fe}^{\text{II}}(\text{tame}-(\text{N}_2\text{S}^{\text{Bz}}(\text{Me}^{\text{e}})\text{Im})_2(\text{MeCN}))](\text{PF}_6)_2 \cdot \text{MeCN}$  (**5**), measuring  $0.08 \times 0.03 \times 0.03 \text{ mm}^3$  was mounted on a loop with oil. Data was collected at  $-173^\circ\text{C}$  on a Bruker APEX II single crystal X-ray diffractometer, Mo-radiation. Crystal-to-detector distance was 40 mm and exposure time was 30 seconds per frame for all sets. The scan width was  $0.5^\circ$ . Data collection was 99.2% complete to  $25^\circ$  in  $\vartheta$ . A total of 21050 reflections were collected covering the indices,  $h = -13$  to 13,  $k = -15$  to 15,  $l = -15$  to 15. 6841 reflections were symmetry independent and the  $R_{\text{int}} = 0.0820$  indicated that the data was of average quality. Indexing and unit cell refinement indicated a triclinic lattice. The space group was found to be  $P\bar{1}$  (No. 2).

**Determining the Dimer-3/Monomer Equilibrium Constant  $K_{eq}(298\text{ K})$ .** The ambient temperature equilibrium constant for the  $\text{Fe}^{\text{II}}\text{Fe}^{\text{II}}\text{-3}$  dimer (D) to  $\text{Fe}^{\text{II}}$  monomer (M) interconversion (eqns (1) and (2)) was calculated using solution Evan's method magnetic data, as described below. At 298 K,  $\mu_{\text{eff}}$  for **3** was determined to be  $2.9\ \mu_{\text{B}}$  in MeCN. This increases to  $\mu_{\text{eff}} = 3.7\ \mu_{\text{B}}$  at 330 K, presumably reflecting a shift in the equilibrium towards a

$$K_{eq} = \frac{[M]^2}{[D]} \quad (1)$$

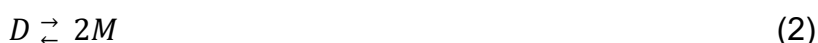

paramagnetic monomer (M). In the solid state, the structure of **3** was shown to be diamagnetic ( $S=0$ ) by low T Mossbauer spectroscopy (at 80 K), and dimeric by X-ray crystallography (at 100 K). A magnetic moment of  $3.7\ \mu_{\text{B}}$  suggests that the monomer is high-spin  $S=2$ , as opposed to intermediate-spin  $S=1$ , since the latter would have a maximum spin-only  $\mu_{\text{eff}}$  of 2.83, and  $\mu_{\text{B}}$  and  $3.7\ \mu_{\text{B}}$  exceeds that number. Although one can not rule out the possibility that dimeric **3** possesses a thermally accessible higher spin-state, the observation of both a dimer and monomer in high resolution mass spectral data provides evidence for an equilibrium. The increased reactivity of **3** towards small molecules, relative to **1** and **2**, would also be consistent with the formation of a monomer in solution. One can calculate the fraction of paramagnetic monomer species at 298 K under the conditions used for the Evan 's method measurements (5.02  $\mu\text{mol}$  of Fe in 550  $\mu\text{L}$  of MeCN- $d^3$ ) using the ratio  $\mu_{\text{eff}}^2(\text{expt})/\mu_{\text{eff}}^2(\text{theoretical})$ . If 100% of the solution consisted of an  $S=2$  monomer, then  $\mu_{\text{eff}}(\text{theoretical})$  would be  $4.9\ \mu_{\text{B}}$ . A magnetic moment of  $2.9\ \mu_{\text{B}}$  at 298 K would thus indicate that 35% of the iron is a paramagnetic monomer (1.76  $\mu\text{mol}$ ) in solution, and 65% a diamagnetic dimer (3.26  $\mu\text{mol}$  of Fe, or 1.63  $\mu\text{mol}$  of dimer). The effective magnetic moment squared ( $\mu_{\text{eff}}^2$ ) was used for this calculation because the measureable macroscopic quantity  $\chi_p$  is dependent on  $\mu_{\text{eff}}^2$ . One can then use this information to calculate the dimer/monomer equilibrium constant at 298 K:  $K_{eq}^{298\text{ K}} = (3.20 \times 10^{-3})^2 / (2.96 \times 10^{-3}) = 3.46 \times 10^{-3}\ \text{M}$ .

**Calculating the UV/vis Extinction Coefficients of Dimeric-3 and its Monomeric Derivative Using the Dimer/Monomer Equilibrium Constant  $K_{eq}$ .** Assuming that both dimeric **3** and its monomeric derivative contribute to the absorbance at  $\lambda_{max} = 619$  nm, we can use Beer's law (eqn (3), pathlength  $l = 1$  cm) and the equilibrium concentrations of dimer and monomer to

$$A^{619} = \epsilon_M[M]_{eq} + \epsilon_D[D]_{eq} \quad (3)$$

determine the extinction coefficients for these two species. Equilibrium monomer and dimer concentrations,  $[M]_{eq}$  and  $[D]_{eq}$ , were determined using two simultaneous equations, eqn (1) and eqn (4). The first of these, eqn (4), relates the initial total Fe concentration to the monomer and dimer concentrations at equilibrium, and the second involves the equilibrium expression of eqn (1). Extinction coefficients for solutions consisting of mixtures of dimeric **3** and its monomeric

$$[Fe]_{tot} = [Fe]_{init} = [M]_{eq} + 2[D]_{eq} \quad (4)$$

derivative were determined at two different total concentrations of Fe ( $[Fe]_{init} = 0.120$  mM, and 0.240 mM). Rearranging eqn (4), we can solve for  $[D]_{eq}$  in terms of  $[M]_{eq}$  and  $[Fe]_{init}$  (eqn (5)), and then plug this into the equilibrium expression of eqn (1) to afford eqn (6). Solving the

$$[D]_{eq} = \frac{([Fe]_{init} - [M]_{eq})}{2} \quad (5)$$

$$K_{eq} = \frac{2[M]_{eq}^2}{([Fe]_{init} - [M]_{eq})} = 0.00346 \quad (6)$$

quadratic equation (eqns (7) – (10)), we obtain  $[M]_{eq} = 0.113$  mM when  $[Fe]_{init} = 0.120$  mM, and  $[M]_{eq} = 0.213$  mM when  $[Fe]_{init} = 0.240$  mM. Plugging these values for  $[M]_{eq}$  into eqn (5) gives  $[D]_{eq} = 0.00357$  mM, and  $[D]_{eq} = 0.0134$  mM, respectively, indicating that the equilibrium mixtures consist mainly of paramagnetic monomer, M.

$$[M]_{eq}^2 + 0.00173[M]_{eq} - 0.00173(1.20 \times 10^{-4} M) = 0 \quad (7)$$

$$[M_{eq}] = \frac{-0.00173 \pm \sqrt{(0.00173)^2 + 4(2.08 \times 10^{-7})}}{2} \quad (8)$$

$$[M]_{eq}^2 + 0.00173[M]_{eq} - 0.00173(2.40 \times 10^{-4} M) = 0 \quad (9)$$

$$[M_{eq}] = \frac{-0.00173 \pm \sqrt{(0.00173)^2 + 4(4.15 \times 10^{-7})}}{2} \quad (10)$$

The measured absorbance at  $\lambda_{max} = 619$  nm was determined to be  $A^{619} = 0.73$  when  $[Fe]_{init} = 0.120$  mM, and  $A^{619} = 1.45$  when  $[Fe]_{init} = 0.240$  mM. The two equations (11) and (12) can then be used to solve for the two unknown extinction coefficients,  $\epsilon_M$  and  $\epsilon_D$ . Rearranging eqn (11)

$$0.73 = 1.13 \times 10^{-4} \epsilon_M + 3.57 \times 10^{-6} \epsilon_D \quad (11)$$

$$1.45 = 2.13 \times 10^{-4} \epsilon_M + 1.34 \times 10^{-5} \epsilon_D \quad (12)$$

provides us with an expression for  $\epsilon_D$ , eqn (13), in terms of  $\epsilon_M$ , which can then be inserted into eqn (12) in order to solve for  $\epsilon_M$  (eqns (14) – (17)). If we then insert this value for  $\epsilon_M$

$$\epsilon_D = \frac{0.73 - 1.13 \times 10^{-4} \epsilon_M}{3.57 \times 10^{-6}} \quad (13)$$

$$1.45 = 2.13 \times 10^{-4} \epsilon_M + 1.34 \times 10^{-5} \frac{(0.73 - 1.13 \times 10^{-4} \epsilon_M)}{3.57 \times 10^{-6}} \quad (14)$$

$$1.45 = 2.13 \times 10^{-4} \epsilon_M + 2.74 - 4.24 \times 10^{-4} \epsilon_M \quad (15)$$

$$1.29 = 2.11 \times 10^{-4} \epsilon_M \quad (16)$$

$$\epsilon_M = 6110 M^{-1} cm^{-1} \quad (17)$$

into eqn (12), we can solve eqns (18)-(20) for the extinction coefficient for dimer-3.

$$1.45 = 2.13 \times 10^{-4} (6110 M^{-1} cm^{-1}) + 1.34 \times 10^{-5} \epsilon_D \quad (18)$$

$$0.148 = 1.34 \times 10^{-5} \epsilon_D \quad (19)$$

$$\epsilon_D = 11,030 M^{-1} cm^{-1} \quad (20)$$

Similarly, we can rearrange eqn (12) to obtain an expression for  $\epsilon_D$ , eqn (21), in terms of  $\epsilon_M$ , which can then be inserted into eqn (11) in order to solve for  $\epsilon_M$  (eqns (22) – (25)). If

$$\varepsilon_D = \frac{1.45 - 2.13 \times 10^{-4} \varepsilon_M}{1.34 \times 10^{-5}} \quad (21)$$

$$0.73 = 1.13 \times 10^{-4} \varepsilon_M + 3.57 \times 10^{-6} \frac{(1.45 - 2.13 \times 10^{-4} \varepsilon_M)}{1.34 \times 10^{-5}} \quad (22)$$

$$0.73 = 1.13 \times 10^{-4} \varepsilon_M + 0.386 - 5.67 \times 10^{-5} \varepsilon_M \quad (23)$$

$$0.344 = 5.63 \times 10^{-5} \varepsilon_M \quad (24)$$

$$\varepsilon_M = 6110 \text{ M}^{-1} \text{ cm}^{-1} \quad (25)$$

we then insert this value for  $\varepsilon_M$  into eqn (11), we can solve eqns (26)-(28) for the extinction coefficient for dimer-**3**.

$$0.73 = 1.13 \times 10^{-4} (6110 \text{ M}^{-1} \text{ cm}^{-1}) + 3.57 \times 10^{-6} \varepsilon_D \quad (26)$$

$$0.0396 = 3.57 \times 10^{-6} \varepsilon_D \quad (27)$$

$$\varepsilon_D = 11,080 \text{ M}^{-1} \text{ cm}^{-1} \quad (28)$$

## References.

- (1) Lugo-Mas, P.; Taylor, W.; Schweitzer, D.; Theisen, R. M.; Xu, L.; Shearer, J.; Swartz, R. D.; Gleaves, M. C.; DiPasquale, A.; Kaminsky, W.; Kovacs, J. A. Properties of Square-Pyramidal Alkyl-Thiolate FeIII Complexes, Including an Analogue of the Unmodified Form of Nitrile Hydratase. *Inorg. Chem.* **2008**, *47*, 11228-11236.
- (2) Neese, F., The ORCA program system. *Interdiscip. Rev. Comput. Mol. Sci.* **2012**, *2*, 73-78.
- (3) Grimme, S.; Ehrlich, S.; Goerigk, L., Effect of the damping function in dispersion corrected density functional theory. *J. Comput. Chem* **2011**, *32*, 1456-1465.
- (4) Grimme, S.; Antony, J.; Ehrlich, S.; Krieg, H., A consistent and accurate ab initio parametrization of density functional dispersion correction (DFT-D) for the 94 elements H-Pu. *J. Chem. Phys.* **2010**, *132*, 154104-154117.
- (5) van Wullen, C., Molecular density functional calculations in the regular relativistic approximation: Method, application to coinage metal diatomics, hydrides, fluorides and chlorides, and comparison with first-order relativistic calculations. *J. Chem. Phys.* **1998**, *109*, 392.
- (6) Klamt, A.; Schüürmann, G., COSMO: a new approach to dielectric screening in solvents with explicit expressions for the screening energy and its gradient. *J. Chem. Soc., Perkin Trans.* **1993**, 799-805.
- (7) Becke, A. D., Density-functional exchange-energy approximation with correct asymptotic behavior. *Phys. Rev. A* **1988**, *38*, 3098-3100.
- (8) Perdew, J. P., Density-functional approximation for the correlation energy of the inhomogeneous electron gas. *Phys. Rev. B* **1986**, *33*, 8822-8224.
- (9) Römelt, M.; Ye, S.; Neese, F., Calibration of Modern Density Functional Theory Methods for the Prediction of Fe Mössbauer Isomer Shifts: Meta-GGA and Double-Hybrid Functionals. *Inorg. Chem.* **2009**, *48*, 784-785.
- (10) Neese, F.; Wennmohs, F.; Hansen, A.; Becker, U., Efficient, approximate and parallel Hartree-Fock and hybrid DFT calculations. A 'chain-of-spheres' algorithm for the Hartree-Fock exchange. *Chem. Phys.* **2009**, *356*, 98-109.
- (11) Dunlap, B. I.; Connolly, J. W. D.; Sabin, J. R., On some approximations in applications of X $\alpha$  theory. *J. Chem. Phys.* **1979**, *71*, 3396-3402.
- (12) Feyereisen, M.; Fitzgerald, G.; Komornicki, A. Use of approximate integrals in ab initio theory. An application in MP2 energy calculations. *Chem. Phys. Lett.* **1993**, *208*, 359-363.
- (13) Neese, F.; Olbrich, G., Efficient use of the resolution of the identity approximation in time-dependent density functional calculations with hybrid density functionals. *Chem. Phys. Lett.* **2002**, *362*, 170-178.
- (14) Pettersen, E. F.; Goddard, T. D.; Huang, C. C.; Couch, G. S.; Greenblatt, D. M.; Meng, E. C.; Ferrin, T. E., UCSF Chimera—A visualization system for exploratory research and analysis. *J. Comput. Chem.* **2004**, *25*, 1605-1612.
- (15) E. Bill, M., Mfit program. Max Planck Institute for Chemical Energy Conversion, Mülheim/Ruhr, Germany.
- (16) M. Kavčič, M. B., A. Mühleisen, F. Gasser, M. Žitnik, K. Bučar, and R. Bohinc, Design and performance of a versatile curved-crystal spectrometer for high-resolution spectroscopy in the tender x-ray range. *Review of Scientific Instruments* **2012**, *83*, 033113.
- (17) Thompson, A.; Attwood, D.; Gullikson, E.; Howells, M. K., K-J; Kirz, J.; Kortright, J.; Lindau, I.; Liu, Y.; Pianetta, P.; Robinson, A. S., J; Underwood, J.; Williams, G.; Winick, H.: *X-ray Data Booklet*; LBNL: California, 2009.
- (18) Ravel, B.; Newville, M. J. ATHENA, ARTEMIS, HEPHAESTUS: data analysis for X-ray absorption spectroscopy using IFEFFIT. *Synchrotron Radiat.* **2005**, *12*, 537-54

## Supplemental Figures.

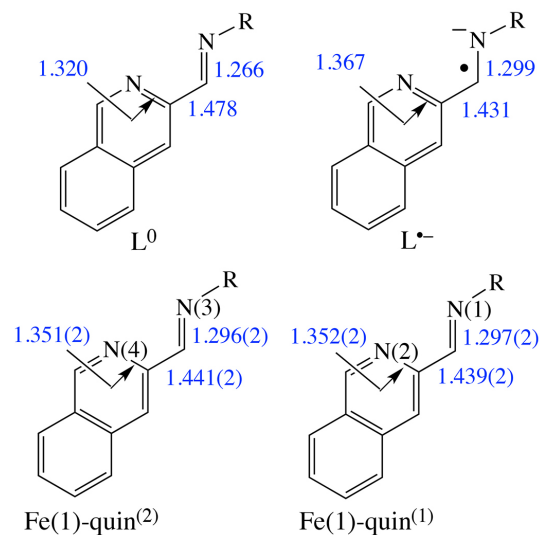

**Figure S1.** Intraligand distances for **2** versus DFT calculated distances for neutral and mono-reduced ( $\alpha$ -imino)quinoline ligands.

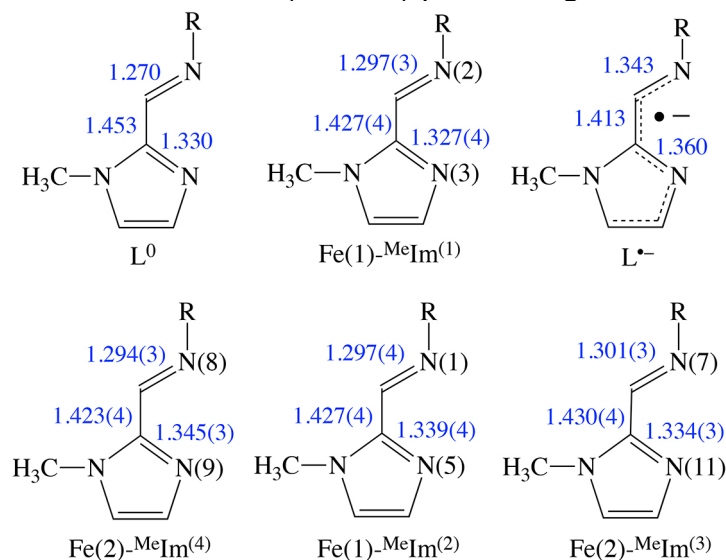

**Figure S2.** Intraligand distances for **3** versus DFT calculated distances for neutral and mono-reduced ( $\alpha$ -imino)imidazole ligands.



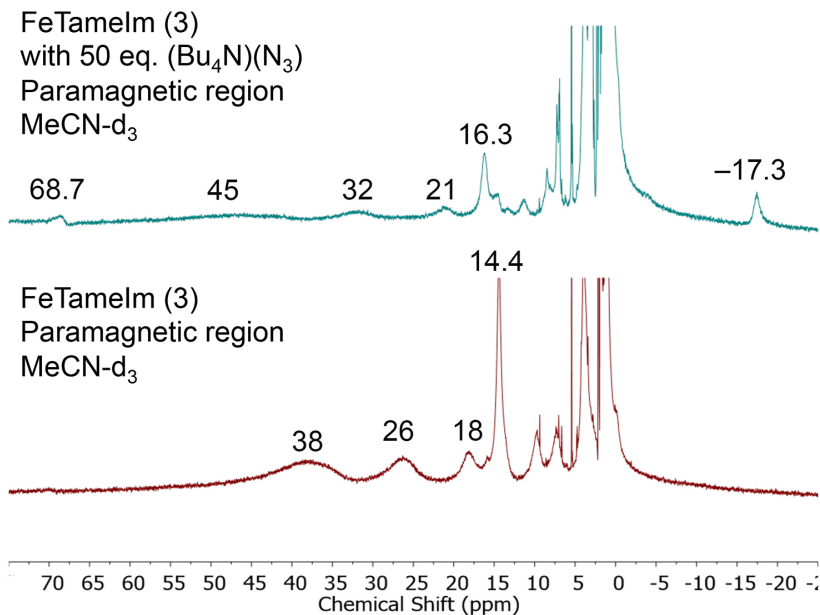

**Figure S3.** <sup>1</sup>H NMR of **3** (in MeCN-d<sup>3</sup>) in the presence (top) and absence (bottom) of (Bu<sub>4</sub>N)(N<sub>3</sub>) showing that peaks in the paramagnetic region shift, consistent with azide binding to a paramagnetic species.

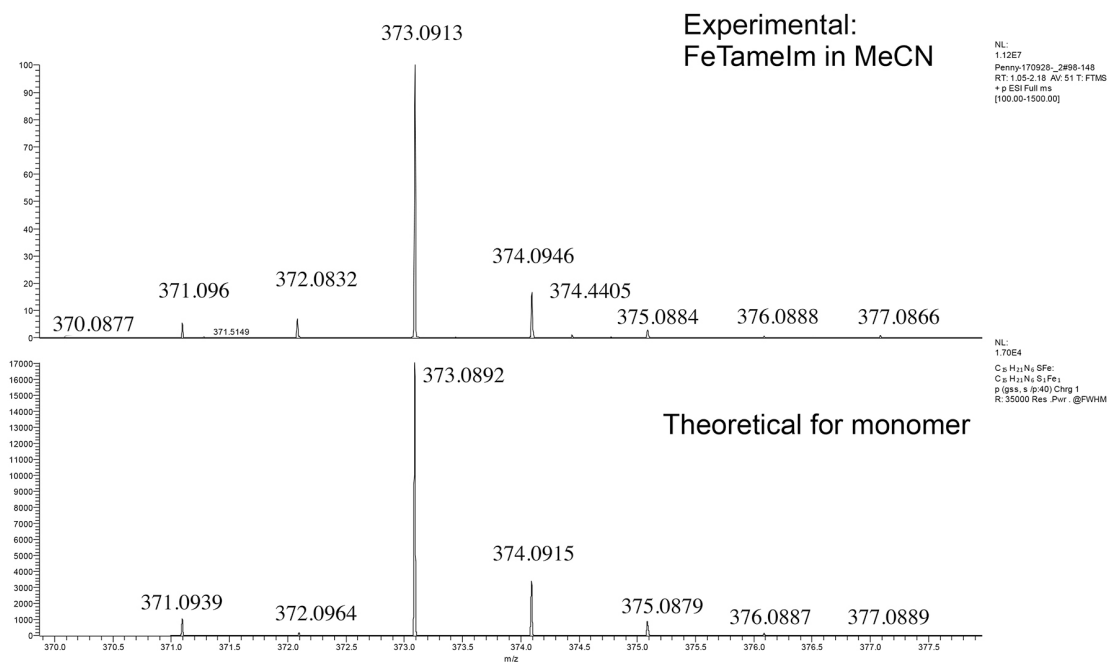

**Figure S4.** LTQ ion trap mass spectrum of **3** in MeCN solution, versus theoretically calculated for a monocationic monomer. Isotopomers show that the majority of **3** converts to a monomer in solution.

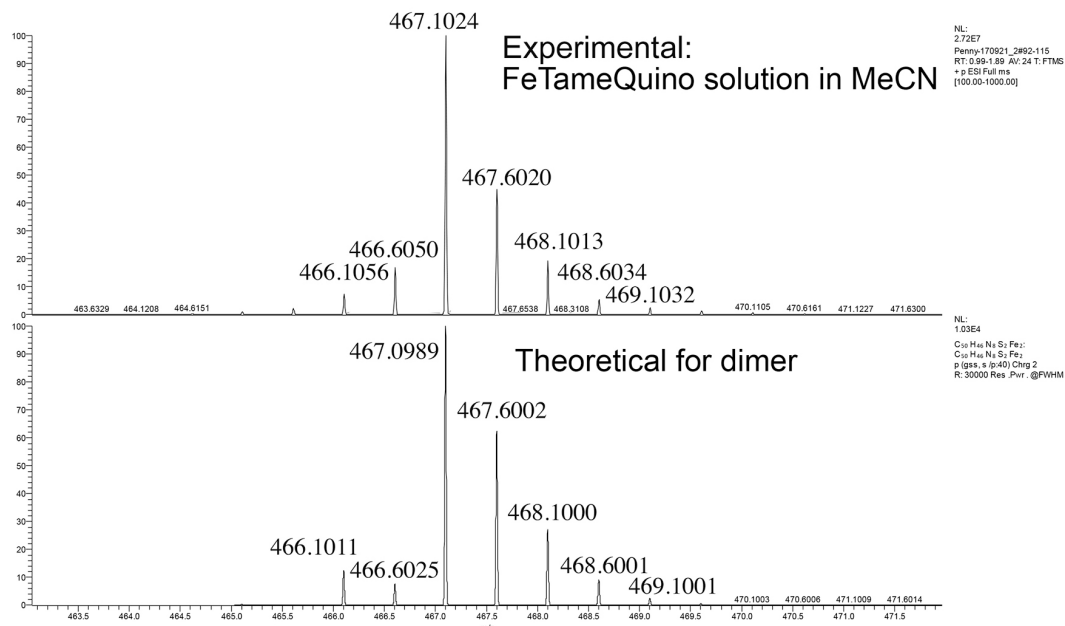

**Figure S5.** LTQ ion trap mass spectrum of **2** in MeCN solution, versus theoretically calculated for a dicationic dimer. Isotopomers show that **2** maintains its dimeric structure in solution.

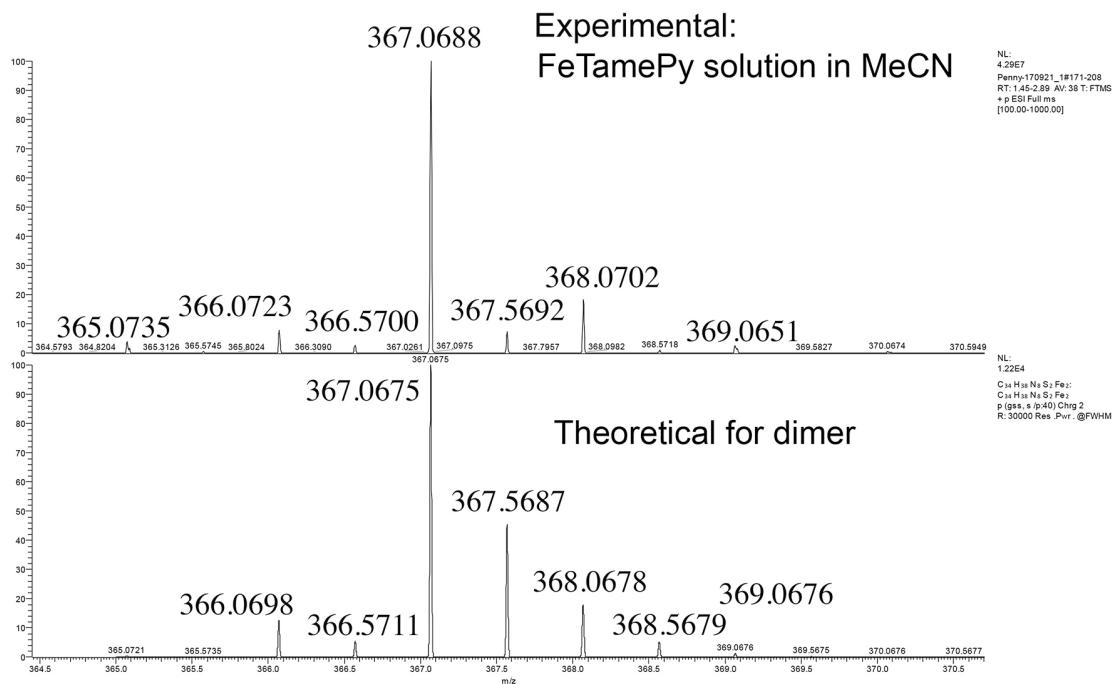

**Figure S6.** LTQ ion trap mass spectrum of **1** in MeCN solution, versus the theoretically calculated spectrum of a dicationic dimer. Isotopomers show that a portion of **1** maintains its dimeric structure in solution.

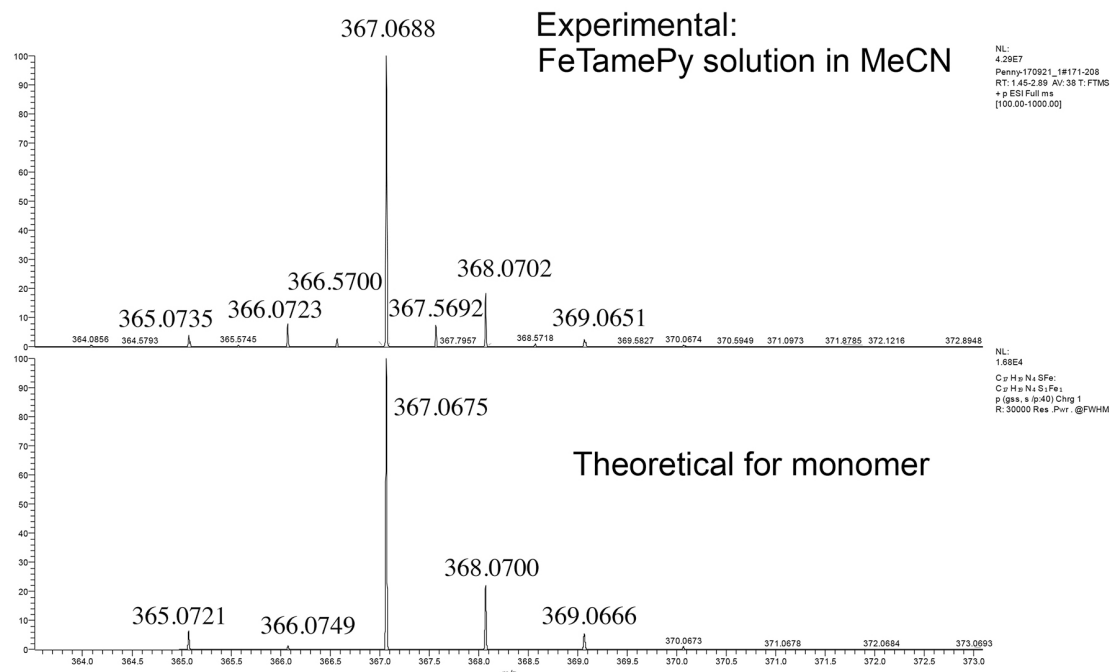

**Figure S7.** LTQ ion trap mass spectrum of **1** in MeCN solution, versus theoretically calculated for a monocationic monomer. Isotopomers show that a portion of **1** converts to a monomer in solution.

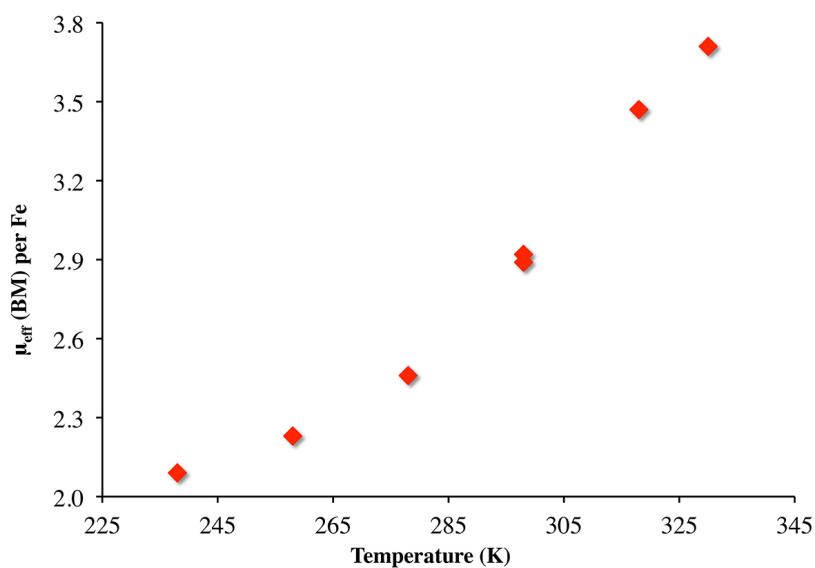

**Figure S8.** Variable-temperature magnetic moment of **3** in MeCN- $d^3$  solution, as determined using the Evan's method.

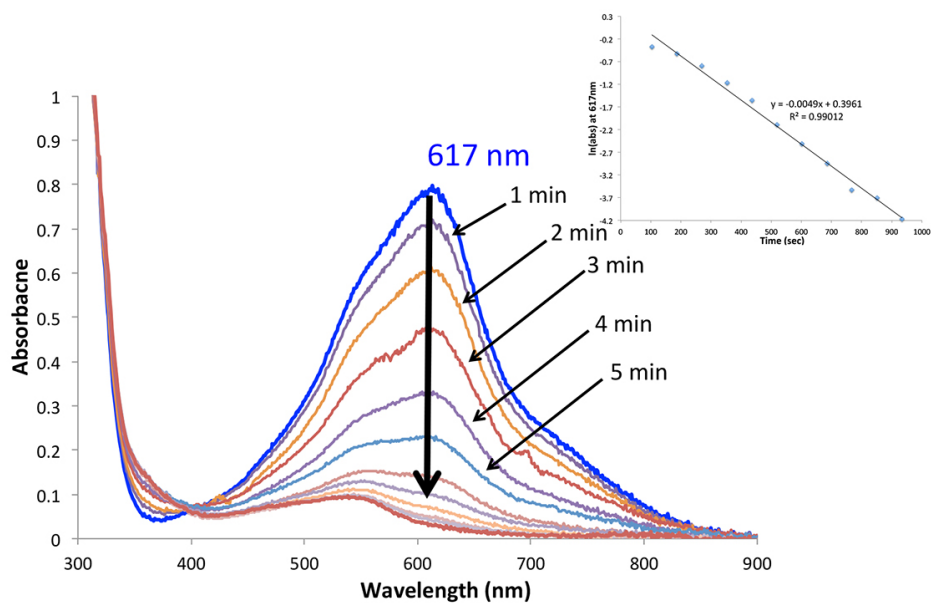

**Figure S9.** Reaction of **3** (0.045 mM) with O<sub>2</sub> in MeCN at 258 K. Scans taken at 1 min intervals. Inset shows pseudo-first order dependence.

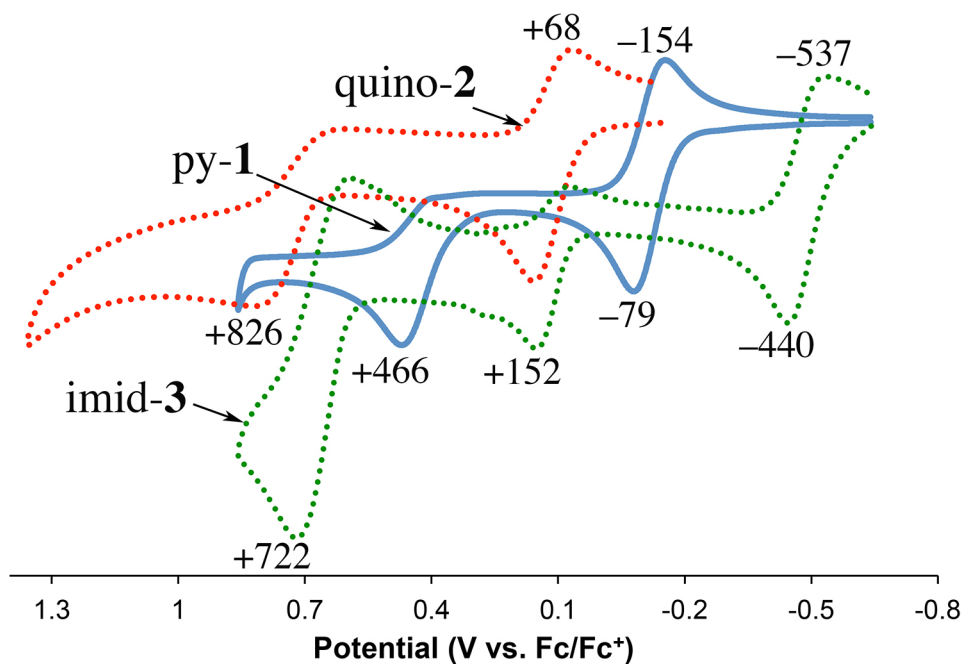

**Figure S10.** Cyclic voltammograms displaying the oxidation waves associated with complexes **1-3**, and the correlation of potentials with ring size.

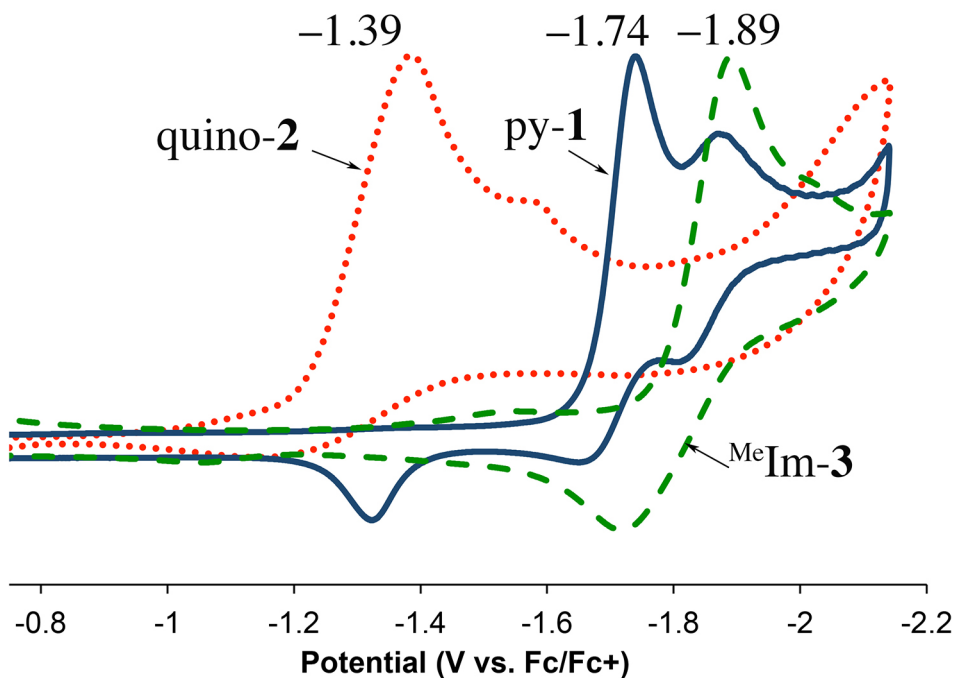

**Figure S11.** Cyclic voltammograms displaying the reduction waves associated with complexes **1-3**, and the correlation of potentials with ring size.

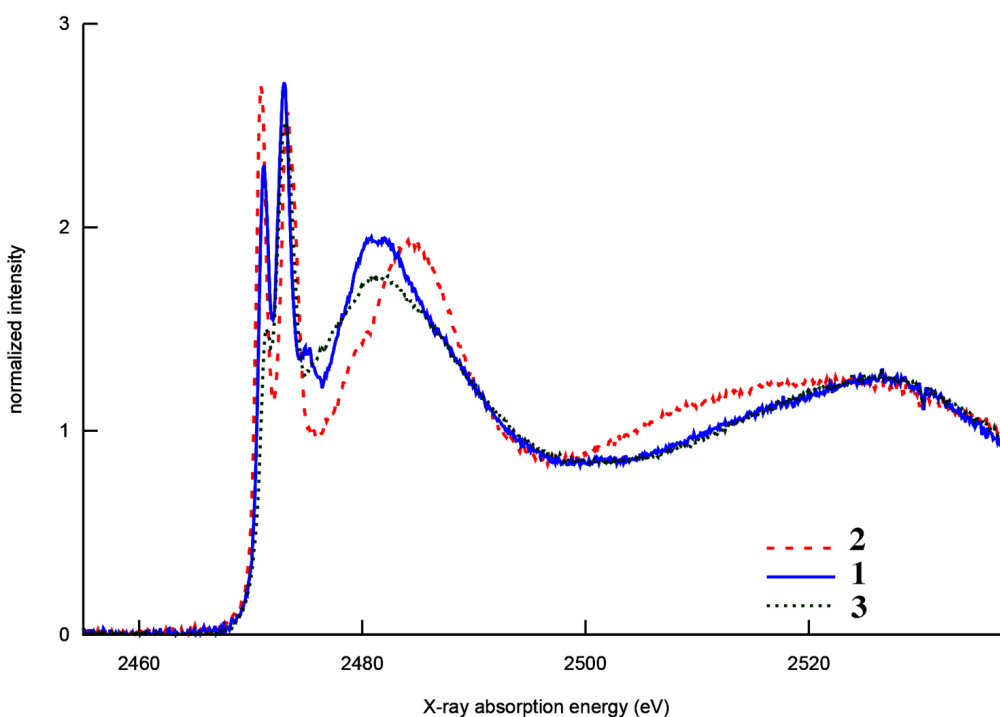

**Figure S12.** Full range of the normalized sulfur K-edge X-ray absorption spectra.

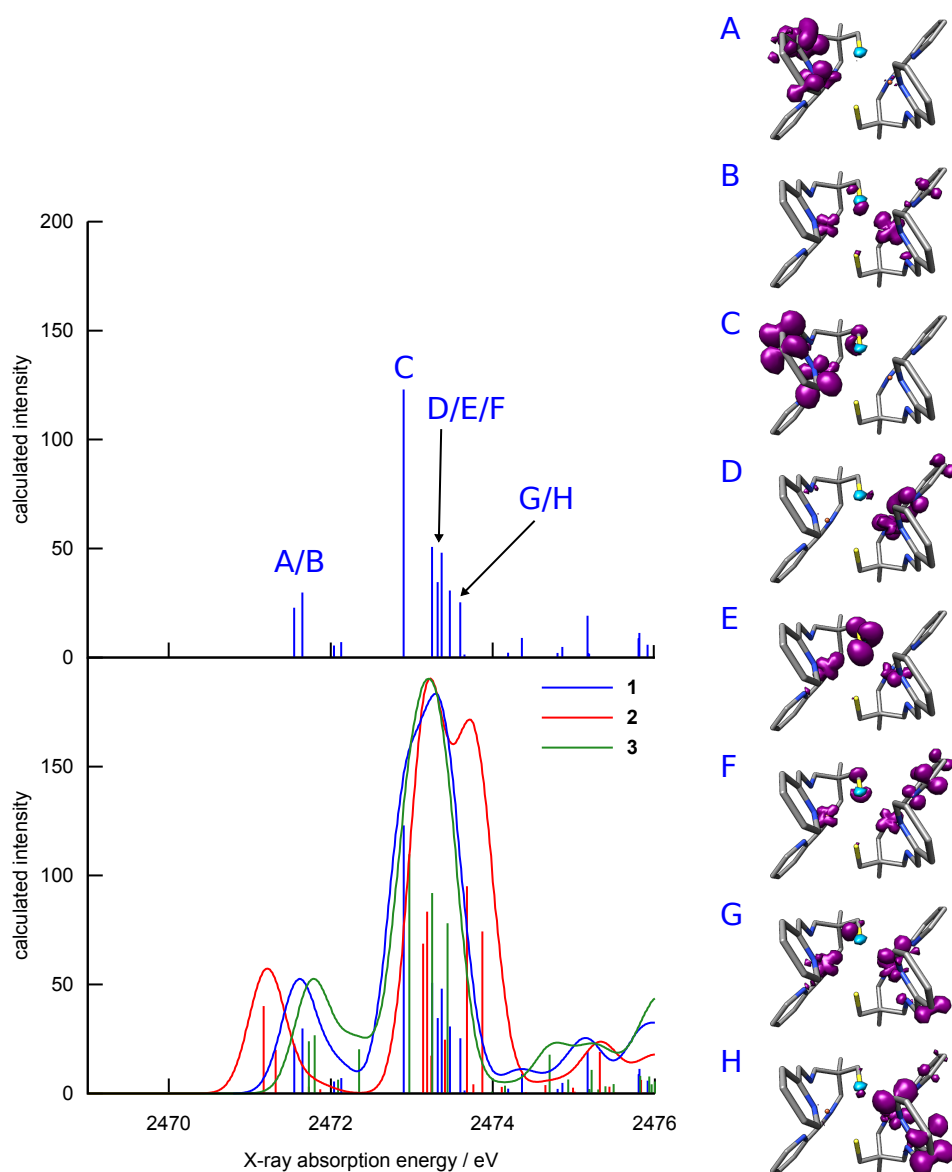

**Figure S13.** Calculated sulfur K-edge X-ray absorption spectra, including representative transition difference densities for **1**. Regions of increased electron density (acceptors) are shown in purple, regions of decreased electron density (donors) are shown in teal.

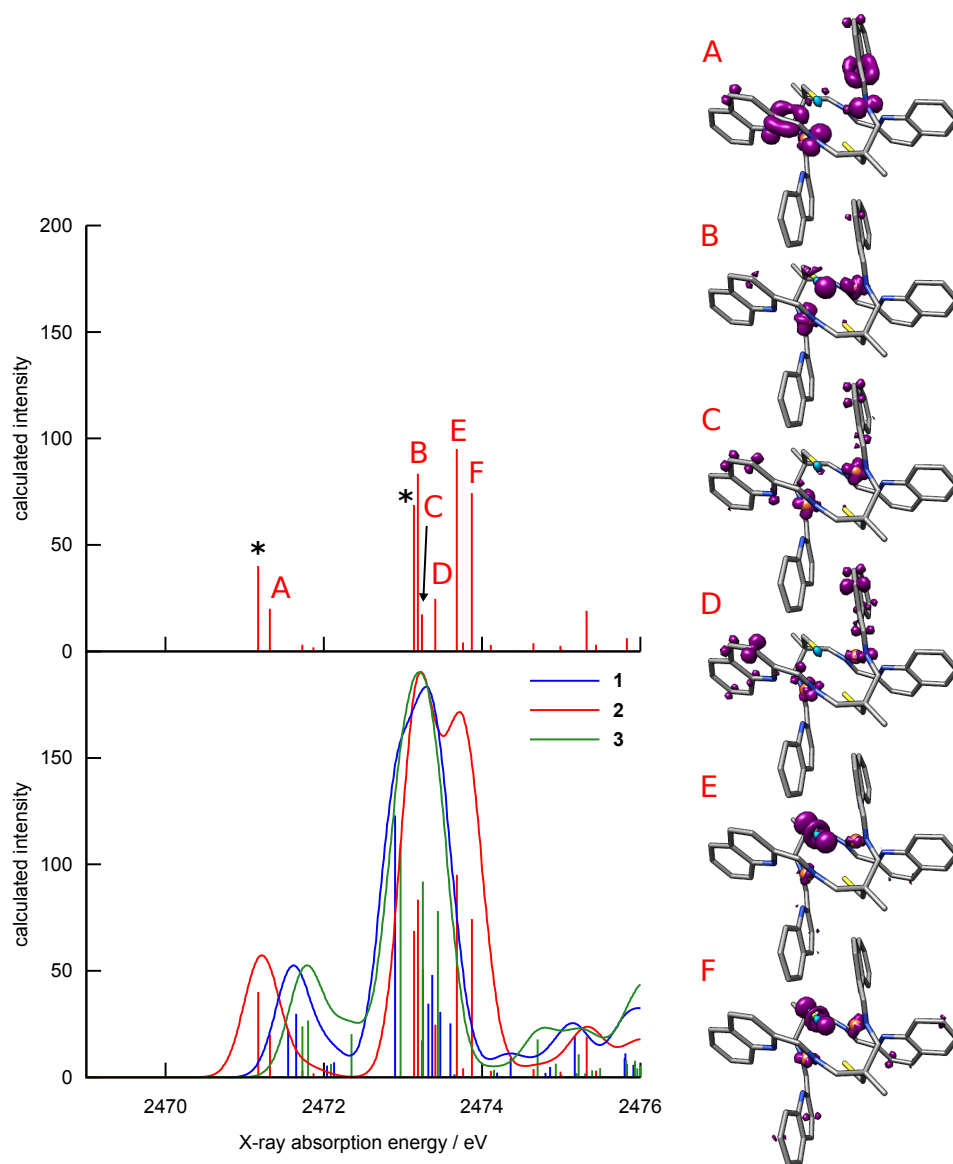

**Figure S14.** Calculated sulfur K-edge X-ray absorption spectra including representative transition difference densities for **2**. Regions of increased electron density (acceptors) are shown in purple, regions of decreased electron density (donors) are shown in teal. Transitions marked with a \* are shown in the manuscript Figure 10.

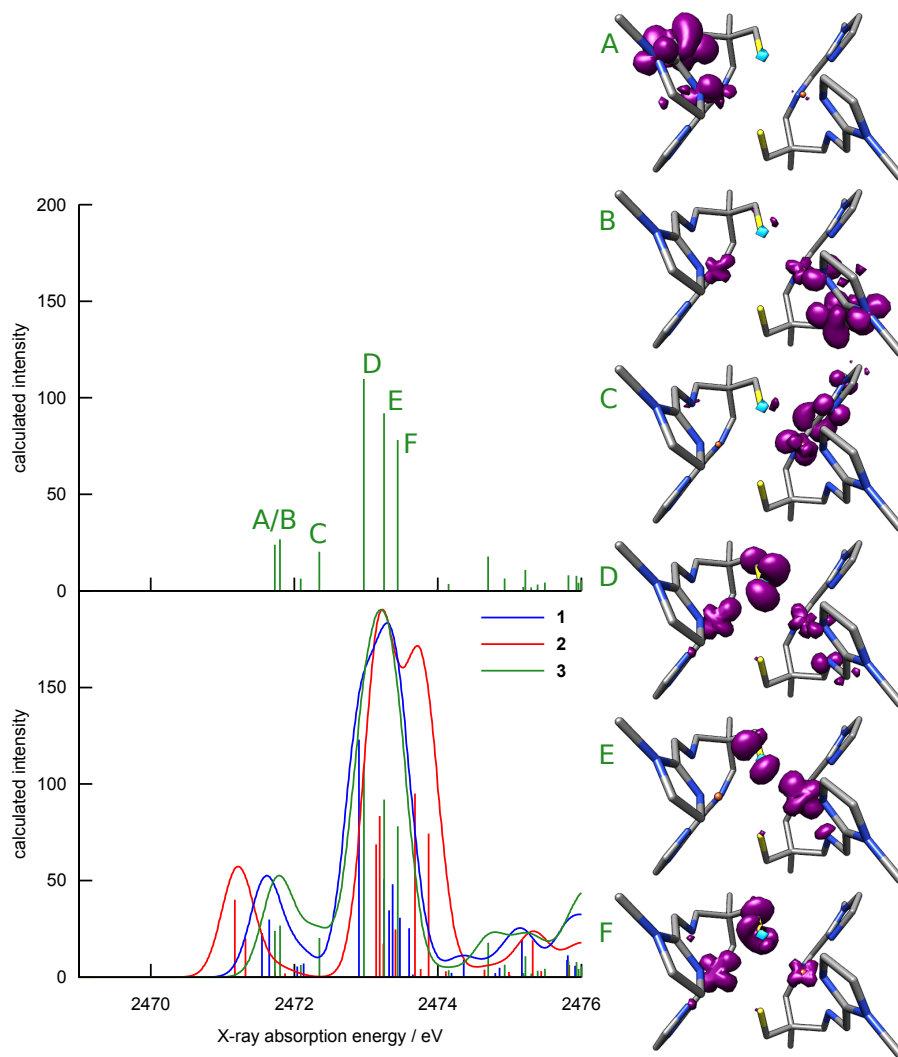

**Figure S15.** Calculated sulfur K-edge X-ray absorption spectra, including representative transition difference densities for **3**. Regions of increased electron density (acceptors) are shown in purple, regions of decreased electron density (donors) are shown in teal.



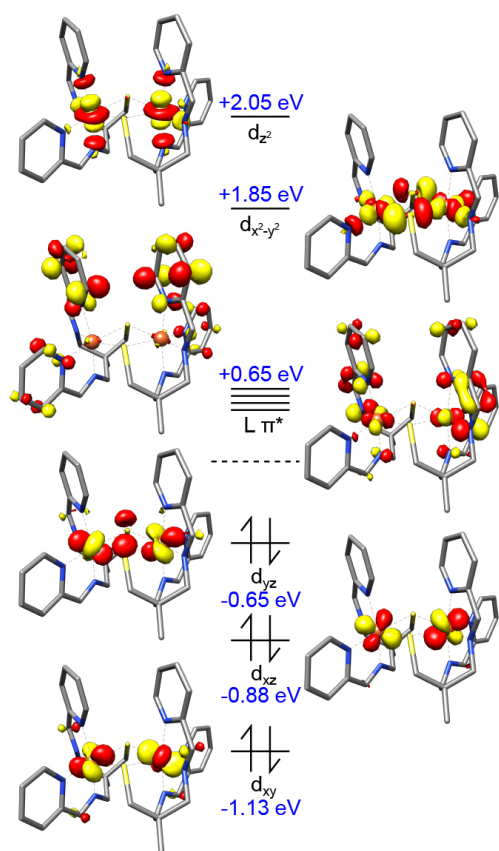

**Figure S16.** DFT calculated MO diagram for **1**.

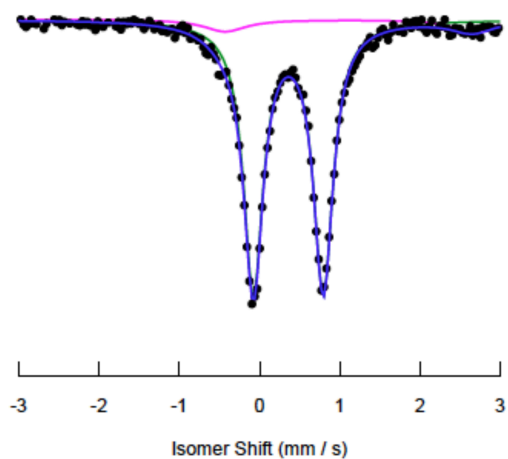

**Figure S17.** Zero-field Mössbauer spectrum of **1**.

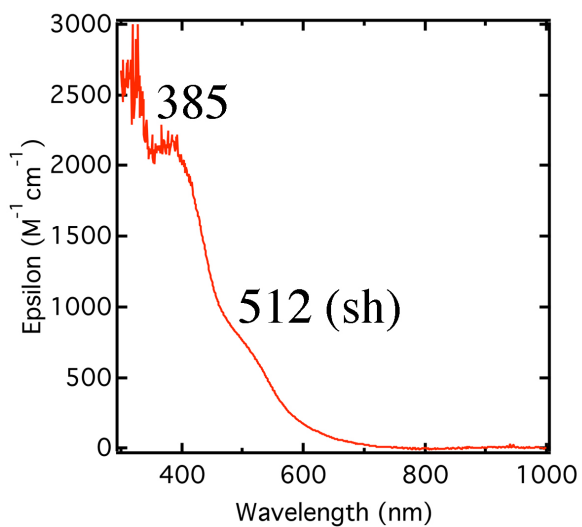

**Figure S18.** Electronic absorption spectrum of the Co(II) complex **4** in MeCN at 298 K.

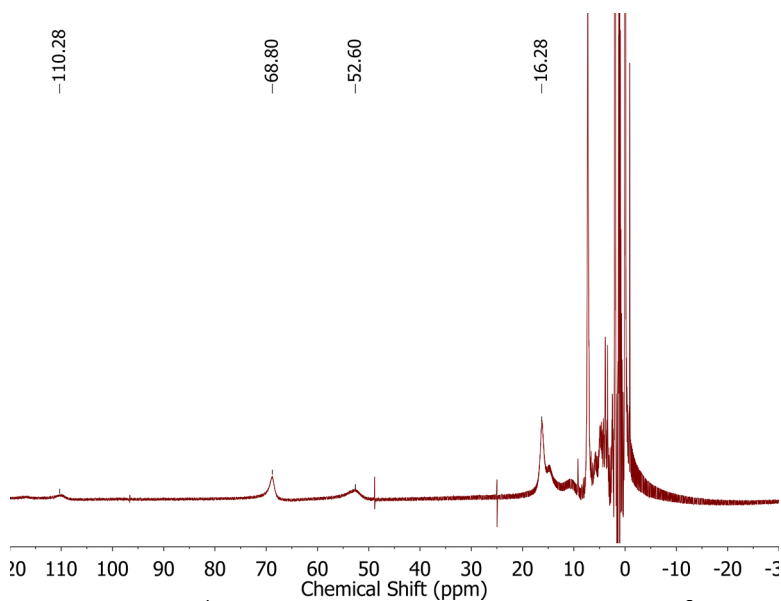

**Figure S19.** <sup>1</sup>H NMR spectrum of **5** in MeCN-*d*<sup>3</sup> at 298 K showing reproducibly observed peaks indicative of a paramagnetic species.

**Table S1.** Sulfur K-edge XAS Pre-Edge Energies for **1-3**.

|          | Pre-Edge Peak #1 (eV) | Pre-Edge Peak #2 (eV) |
|----------|-----------------------|-----------------------|
| <b>1</b> | 2471.2                | 2473.0                |
| <b>2</b> | 2470.9                | 2473.3                |
| <b>3</b> | 2471.4                | 2473.1                |

**Table S2.** Selected DFT calculated bond distances (Å) for **1-3**.

|                                         | <b>1</b> | <b>2</b> | <b>3 Fe(1)*</b> | <b>3 Fe(2)</b> |
|-----------------------------------------|----------|----------|-----------------|----------------|
| <b>Fe-S(1)</b>                          | 2.270    | 2.243    | 2.323           | 2.320          |
| <b>Fe-S(2)</b>                          | 2.283    | 2.243    | 2.322           | 2.328          |
| <b>Fe-N(1)<sup>imine</sup></b>          | 1.900    | 1.925    | 1.949           | 1.956          |
| <b>Fe-N(2)<sup>imine</sup></b>          | 1.890    | 1.927    | 1.954           | 1.960          |
| <b>Fe(1)-N(3)<sup>NHet</sup></b>        | 1.957    | 1.937    | 1.982           | 1.980          |
| <b>Fe(1)-N(4)<sup>NHet</sup></b>        | 1.962    | 1.936    | 1.990           | 1.982          |
| <b>Fe-N(7)<sup>imine</sup></b>          | N/A      | N/A      | 1.949           | 1.956          |
| <b>Fe-N(8)<sup>imine</sup></b>          | N/A      | N/A      | 1.954           | 1.960          |
| <b>Intra-Ligand</b>                     |          |          |                 |                |
| <b>N<sup>im</sup>(1)-C<sup>im</sup></b> | 1.310    | 1.313    | 1.293           | 1.293          |
| <b>C<sup>im</sup>-C<sup>ipso</sup></b>  | 1.432    | 1.439    | 1.426           | 1.428          |
| <b>N<sup>im</sup>(2)-C<sup>im</sup></b> | 1.306    | 1.313    | 1.290           | 1.290          |
| <b>C<sup>im</sup>-C<sup>ipso</sup></b>  | 1.434    | 1.439    | 1.429           | 1.430          |

\*Note: For **1** and **2**, the two halves of the dimer are related by a crystallographic inversion center, whereas the space group of **3** is less symmetric.

**Table S3.** Percent Sulfur Character in the Lowest Unoccupied (LUMO) and Highest Occupied Molecular Orbitals (HOMOs) of **1-3**.

| Compound                                 | Orbital                                  | % Fe            | % S  | % L $\pi^*$ |
|------------------------------------------|------------------------------------------|-----------------|------|-------------|
| Fe(II) Pyr ( <b>1</b> )                  | d <sub>yz</sub>                          | 65.8            | 1.1  | 23.1        |
|                                          | d <sub>xz</sub>                          | 78.1            | 1.7  | 10.5        |
|                                          | d <sub>xv</sub>                          | 71.6            | 7.9  | 11.0        |
|                                          | L $\pi^*$                                | 12.9            | 1.8  | 65.3        |
|                                          | d <sub>x<sup>2</sup>-y<sup>2</sup></sub> | 51.1            | 20.2 | 18.6        |
|                                          | d <sub>z<sup>2</sup></sub>               | 60.8            | 6.0  | 21.0        |
|                                          | Fe(II) Quino ( <b>2</b> )                | d <sub>yz</sub> | 56.0 | 6.9         |
| d <sub>xz</sub>                          |                                          | 70.1            | 2.5  | 17.8        |
| d <sub>xv</sub>                          |                                          | 78.6            | 3.2  | 10.1        |
| L $\pi^*$                                |                                          | 15.3            | 2.3  | 62.0        |
| d <sub>x<sup>2</sup>-v<sup>2</sup></sub> |                                          | 46.5            | 17.8 | 22.7        |
| d <sub>z<sup>2</sup></sub>               |                                          | 55.6            | 6.9  | 24.8        |
| Fe(II) Imid ( <b>3</b> )                 |                                          | d <sub>yz</sub> | 70.4 | 1.25        |
|                                          | d <sub>xz</sub>                          | 81.9            | 1.2  | 8.6         |
|                                          | d <sub>xy</sub>                          | 75.25           | 6.3  | 10.0        |
|                                          | L $\pi^*$                                | 12.2            | 1.4  | 66.6        |
|                                          | d <sub>x<sup>2</sup>-v<sup>2</sup></sub> | 58.5            | 21.1 | 12.4        |
|                                          | d <sub>z<sup>2</sup></sub>               | 65.6            | 5.6  | 18.7        |

**Table S4.** Crystal data and structure refinement for  $[\text{Fe}^{\text{II}}(\text{tame}(\text{N}_2\text{S}(\text{py})_2)]_2(\text{BPh}_4)_2$  (**1**).

|                                   |                                                                                                                  |
|-----------------------------------|------------------------------------------------------------------------------------------------------------------|
| Identification code               | rmt-i-147                                                                                                        |
| Empirical formula                 | C82 H78 B2 Fe2 N8 S2                                                                                             |
| Formula weight                    | 1372.99                                                                                                          |
| Temperature                       | 130(2) K                                                                                                         |
| Wavelength                        | 0.71073 Å                                                                                                        |
| Crystal system, space group       | Orthorhombic, Pbcn (No. 60)                                                                                      |
| Unit cell dimensions              | a = 19.7560(6) Å    alpha = 90 deg.<br>b = 18.2950(7) Å    beta = 90 deg.<br>c = 20.3950(8) Å    gamma = 90 deg. |
| Volume                            | 7371.5(5) Å <sup>3</sup>                                                                                         |
| Z, Calculated density             | 8, 1.237 mg/m <sup>3</sup>                                                                                       |
| Absorption coefficient            | 0.500 mm <sup>-1</sup>                                                                                           |
| F(000)                            | 2880                                                                                                             |
| Crystal size                      | 0.34 x 0.22 x 0.22 mm                                                                                            |
| Theta range for data collection   | 2.99 to 23.26 deg.                                                                                               |
| Limiting indices                  | -26 ≤ h ≤ 22, -23 ≤ k ≤ 23, -27 ≤ l ≤ 27                                                                         |
| Reflections collected / unique    | 9273 / 5042 [R(int) = 0.1378]                                                                                    |
| Completeness to theta = 23.26     | 95.0 %                                                                                                           |
| Absorption correction             | HKL-2000                                                                                                         |
| Max. and min. transmission        | 0.8980 and 0.8485                                                                                                |
| Refinement method                 | Full-matrix least-squares on F <sup>2</sup>                                                                      |
| Data / restraints / parameters    | 5042 / 0 / 433                                                                                                   |
| Goodness-of-fit on F <sup>2</sup> | 1.005                                                                                                            |
| Final R indices [I > 2σ(I)]       | R1 = 0.0582, wR2 = 0.1168                                                                                        |
| R indices (all data)              | R1 = 0.1267, wR2 = 0.1405                                                                                        |
| Largest diff. peak and hole       | 0.898 and -0.368 e.Å <sup>-3</sup>                                                                               |

**Table S5.** Atomic coordinates ( $\times 10^4$ ) and equivalent isotropic displacement parameters ( $\text{\AA}^2 \times 10^3$ ) for  $[\text{Fe}^{\text{II}}(\text{tame}(\text{N}_2\text{S}(\text{py})_2)]_2(\text{BPh}_4)_2$  (**1**).  $U(\text{eq})$  is defined as one third of the trace of the orthogonalized  $U_{ij}$  tensor.

|       | x       | y       | z       | U(eq) |
|-------|---------|---------|---------|-------|
| Fe(1) | 4256(1) | 2816(1) | 2070(1) | 27(1) |
| S(1)  | 5383(1) | 2990(1) | 1874(1) | 30(1) |
| N(1)  | 4248(2) | 1776(2) | 2002(2) | 34(1) |
| N(2)  | 4215(2) | 2833(3) | 1132(2) | 40(1) |
| N(3)  | 4115(2) | 3888(2) | 1944(2) | 35(1) |
| N(4)  | 3321(2) | 2622(2) | 2379(2) | 32(1) |
| C(1)  | 2863(2) | 3105(3) | 2605(2) | 34(1) |
| C(2)  | 2239(3) | 2897(3) | 2838(2) | 42(1) |
| C(3)  | 2077(3) | 2167(4) | 2870(3) | 47(2) |
| C(4)  | 2541(3) | 1672(3) | 2649(3) | 44(2) |
| C(5)  | 3166(3) | 1898(3) | 2409(2) | 32(1) |
| C(6)  | 3687(3) | 1451(3) | 2151(3) | 37(1) |
| C(7)  | 4774(3) | 1361(3) | 1649(3) | 43(2) |
| C(8)  | 4435(3) | 2192(3) | 744(3)  | 45(2) |
| C(9)  | 5607(3) | 2321(3) | 1266(3) | 41(2) |
| C(10) | 5022(3) | 1783(3) | 1057(3) | 40(1) |
| C(11) | 5314(3) | 1254(4) | 562(3)  | 61(2) |
| C(12) | 4164(2) | 3473(4) | 861(3)  | 42(2) |
| C(13) | 4089(2) | 4069(3) | 1294(3) | 40(2) |
| C(14) | 4020(3) | 4807(4) | 1104(4) | 63(2) |
| C(15) | 3999(3) | 5334(5) | 1553(5) | 81(3) |
| C(16) | 4029(3) | 5154(3) | 2217(4) | 61(2) |
| C(17) | 4077(3) | 4416(3) | 2391(3) | 46(2) |
| C(18) | 2970(2) | 4692(3) | 4588(2) | 32(1) |
| C(19) | 3579(3) | 4372(3) | 4415(3) | 48(2) |
| C(20) | 4140(3) | 4781(4) | 4194(3) | 60(2) |
| C(21) | 4092(3) | 5512(4) | 4138(3) | 61(2) |
| C(22) | 3503(3) | 5859(3) | 4296(2) | 49(2) |
| C(23) | 2953(3) | 5446(3) | 4521(2) | 43(2) |
| C(24) | 1917(3) | 4710(3) | 5417(2) | 31(1) |
| C(25) | 2288(3) | 4882(3) | 5983(2) | 38(1) |
| C(26) | 2001(3) | 5295(3) | 6497(3) | 46(2) |
| C(27) | 1350(3) | 5530(3) | 6455(3) | 47(2) |
| C(28) | 972(3)  | 5368(3) | 5913(3) | 40(1) |
| C(29) | 1258(3) | 4953(3) | 5404(3) | 33(1) |
| C(30) | 1752(2) | 4180(3) | 4207(2) | 30(1) |
| C(31) | 1700(3) | 4684(3) | 3711(2) | 49(2) |
| C(32) | 1197(4) | 4656(4) | 3231(3) | 67(2) |
| C(33) | 728(3)  | 4131(5) | 3245(3) | 69(2) |
| C(34) | 751(3)  | 3584(5) | 3730(3) | 73(2) |
| C(35) | 1270(3) | 3630(4) | 4197(2) | 49(2) |
| C(36) | 2486(2) | 3416(3) | 5059(2) | 31(1) |
| C(37) | 2442(3) | 3147(3) | 5693(3) | 43(2) |
| C(38) | 2603(3) | 2434(3) | 5863(3) | 52(2) |
| C(39) | 2806(3) | 1935(3) | 5403(3) | 48(2) |
| C(40) | 2872(3) | 2185(3) | 4752(2) | 39(1) |

|       |         |         |         |       |
|-------|---------|---------|---------|-------|
| C(41) | 2705(2) | 2880(3) | 4599(2) | 33(1) |
| B(1)  | 2284(3) | 4241(3) | 4823(3) | 31(1) |

---

**Table S6.** Bond lengths [Å] and angles [deg] for [Fe<sup>II</sup>(tame-(N<sub>2</sub>S(py)<sub>2</sub>)<sub>2</sub>)(BPh<sub>4</sub>)<sub>2</sub>] (1).

---

|              |            |
|--------------|------------|
| Fe(1)-N(1)   | 1.908(4)   |
| Fe(1)-N(2)   | 1.916(4)   |
| Fe(1)-N(4)   | 1.984(4)   |
| Fe(1)-N(3)   | 1.997(4)   |
| Fe(1)-S(1)   | 2.2838(13) |
| Fe(1)-S(1')  | 2.2896(14) |
| S(1)-C(9)    | 1.797(5)   |
| S(1)-Fe(1')  | 2.2897(14) |
| N(1)-C(6)    | 1.294(6)   |
| N(1)-C(7)    | 1.475(6)   |
| N(2)-C(12)   | 1.300(7)   |
| N(2)-C(8)    | 1.479(7)   |
| N(3)-C(17)   | 1.330(7)   |
| N(3)-C(13)   | 1.367(6)   |
| N(4)-C(1)    | 1.346(6)   |
| N(4)-C(5)    | 1.360(6)   |
| C(1)-C(2)    | 1.376(7)   |
| C(1)-H(1)    | 0.9302     |
| C(2)-C(3)    | 1.376(8)   |
| C(2)-H(2)    | 0.9301     |
| C(3)-C(4)    | 1.364(8)   |
| C(3)-H(3)    | 0.9302     |
| C(4)-C(5)    | 1.392(7)   |
| C(4)-H(4)    | 0.9301     |
| C(5)-C(6)    | 1.417(7)   |
| C(6)-H(6)    | 0.9296     |
| C(7)-C(10)   | 1.515(8)   |
| C(7)-H(7A)   | 0.9693     |
| C(7)-H(7B)   | 0.9703     |
| C(8)-C(10)   | 1.522(8)   |
| C(8)-H(8A)   | 0.9698     |
| C(8)-H(8B)   | 0.9702     |
| C(9)-C(10)   | 1.578(7)   |
| C(9)-H(9A)   | 0.9701     |
| C(9)-H(9B)   | 0.9699     |
| C(10)-C(11)  | 1.513(7)   |
| C(11)-H(11A) | 0.9598     |
| C(11)-H(11B) | 0.9599     |
| C(11)-H(11C) | 0.9599     |
| C(12)-C(13)  | 1.411(8)   |
| C(12)-H(12)  | 0.9299     |
| C(13)-C(14)  | 1.411(9)   |
| C(14)-C(15)  | 1.330(10)  |
| C(14)-H(14)  | 0.9302     |
| C(15)-C(16)  | 1.396(10)  |
| C(15)-H(15)  | 0.9301     |
| C(16)-C(17)  | 1.399(8)   |
| C(16)-H(16)  | 0.9300     |
| C(17)-H(17)  | 0.9297     |
| C(18)-C(19)  | 1.382(7)   |
| C(18)-C(23)  | 1.386(7)   |



|                 |            |
|-----------------|------------|
| C(18)-B(1)      | 1.658(8)   |
| C(19)-C(20)     | 1.412(8)   |
| C(19)-H(19)     | 0.9300     |
| C(20)-C(21)     | 1.346(9)   |
| C(20)-H(20)     | 0.9301     |
| C(21)-C(22)     | 1.363(9)   |
| C(21)-H(21)     | 0.9302     |
| C(22)-C(23)     | 1.401(8)   |
| C(22)-H(22)     | 0.9294     |
| C(23)-H(23)     | 0.9301     |
| C(24)-C(29)     | 1.377(7)   |
| C(24)-C(25)     | 1.402(7)   |
| C(24)-B(1)      | 1.653(7)   |
| C(25)-C(26)     | 1.412(8)   |
| C(25)-H(25)     | 0.9303     |
| C(26)-C(27)     | 1.358(8)   |
| C(26)-H(26)     | 0.9298     |
| C(27)-C(28)     | 1.366(8)   |
| C(27)-H(27)     | 0.9298     |
| C(28)-C(29)     | 1.404(7)   |
| C(28)-H(28)     | 0.9301     |
| C(29)-H(29)     | 0.9302     |
| C(30)-C(31)     | 1.374(7)   |
| C(30)-C(35)     | 1.385(8)   |
| C(30)-B(1)      | 1.642(7)   |
| C(31)-C(32)     | 1.395(9)   |
| C(31)-H(31)     | 0.9300     |
| C(32)-C(33)     | 1.334(10)  |
| C(32)-H(32)     | 0.9299     |
| C(33)-C(34)     | 1.408(10)  |
| C(33)-H(33)     | 0.9300     |
| C(34)-C(35)     | 1.402(8)   |
| C(34)-H(34)     | 0.9302     |
| C(35)-H(35)     | 0.9300     |
| C(36)-C(37)     | 1.387(7)   |
| C(36)-C(41)     | 1.425(7)   |
| C(36)-B(1)      | 1.633(8)   |
| C(37)-C(38)     | 1.388(8)   |
| C(37)-H(37)     | 0.9302     |
| C(38)-C(39)     | 1.370(8)   |
| C(38)-H(38)     | 0.9303     |
| C(39)-C(40)     | 1.409(7)   |
| C(39)-H(39)     | 0.9301     |
| C(40)-C(41)     | 1.351(7)   |
| C(40)-H(40)     | 0.9301     |
| C(41)-H(41)     | 0.9297     |
|                 |            |
| N(1)-Fe(1)-N(2) | 86.7(2)    |
| N(1)-Fe(1)-N(4) | 80.61(17)  |
| N(2)-Fe(1)-N(4) | 106.30(16) |
| N(1)-Fe(1)-N(3) | 165.63(17) |
| N(2)-Fe(1)-N(3) | 81.4(2)    |
| N(4)-Fe(1)-N(3) | 95.01(17)  |
| N(1)-Fe(1)-S(1) | 97.66(13)  |
| N(2)-Fe(1)-S(1) | 82.20(12)  |

|                   |            |
|-------------------|------------|
| N(4)-Fe(1)-S(1)   | 171.13(12) |
| N(3)-Fe(1)-S(1)   | 88.69(12)  |
| N(1)-Fe(1)-S(1')  | 102.07(13) |
| N(2)-Fe(1)-S(1')  | 161.83(13) |
| N(4)-Fe(1)-S(1')  | 90.95(12)  |
| N(3)-Fe(1)-S(1')  | 91.63(13)  |
| S(1)-Fe(1)-S(1')  | 80.87(5)   |
| C(9)-S(1)-Fe(1)   | 105.50(17) |
| C(9)-S(1)-Fe(1')  | 118.5(2)   |
| Fe(1)-S(1)-Fe(1') | 96.91(5)   |
| C(6)-N(1)-C(7)    | 118.8(4)   |
| C(6)-N(1)-Fe(1)   | 116.6(3)   |
| C(7)-N(1)-Fe(1)   | 122.9(3)   |
| C(12)-N(2)-C(8)   | 120.6(5)   |
| C(12)-N(2)-Fe(1)  | 116.2(4)   |
| C(8)-N(2)-Fe(1)   | 120.7(4)   |
| C(17)-N(3)-C(13)  | 119.1(5)   |
| C(17)-N(3)-Fe(1)  | 129.3(4)   |
| C(13)-N(3)-Fe(1)  | 111.5(4)   |
| C(1)-N(4)-C(5)    | 118.2(4)   |
| C(1)-N(4)-Fe(1)   | 128.1(4)   |
| C(5)-N(4)-Fe(1)   | 113.5(3)   |
| N(4)-C(1)-C(2)    | 122.6(5)   |
| N(4)-C(1)-H(1)    | 118.9      |
| C(2)-C(1)-H(1)    | 118.5      |
| C(1)-C(2)-C(3)    | 119.6(5)   |
| C(1)-C(2)-H(2)    | 120.0      |
| C(3)-C(2)-H(2)    | 120.4      |
| C(4)-C(3)-C(2)    | 118.2(5)   |
| C(4)-C(3)-H(3)    | 121.0      |
| C(2)-C(3)-H(3)    | 120.7      |
| C(3)-C(4)-C(5)    | 121.0(5)   |
| C(3)-C(4)-H(4)    | 119.9      |
| C(5)-C(4)-H(4)    | 119.1      |
| N(4)-C(5)-C(4)    | 120.4(5)   |
| N(4)-C(5)-C(6)    | 112.4(4)   |
| C(4)-C(5)-C(6)    | 127.2(5)   |
| N(1)-C(6)-C(5)    | 116.4(5)   |
| N(1)-C(6)-H(6)    | 121.6      |
| C(5)-C(6)-H(6)    | 122.0      |
| N(1)-C(7)-C(10)   | 110.7(5)   |
| N(1)-C(7)-H(7A)   | 108.7      |
| C(10)-C(7)-H(7A)  | 108.7      |
| N(1)-C(7)-H(7B)   | 110.6      |
| C(10)-C(7)-H(7B)  | 109.7      |
| H(7A)-C(7)-H(7B)  | 108.2      |
| N(2)-C(8)-C(10)   | 112.9(4)   |
| N(2)-C(8)-H(8A)   | 108.4      |
| C(10)-C(8)-H(8A)  | 108.9      |
| N(2)-C(8)-H(8B)   | 109.4      |
| C(10)-C(8)-H(8B)  | 109.2      |
| H(8A)-C(8)-H(8B)  | 107.9      |
| C(10)-C(9)-S(1)   | 115.5(3)   |
| C(10)-C(9)-H(9A)  | 108.9      |
| S(1)-C(9)-H(9A)   | 109.0      |

|                     |          |
|---------------------|----------|
| C(10)-C(9)-H(9B)    | 107.3    |
| S(1)-C(9)-H(9B)     | 108.4    |
| H(9A)-C(9)-H(9B)    | 107.4    |
| C(11)-C(10)-C(7)    | 109.2(5) |
| C(11)-C(10)-C(8)    | 109.0(5) |
| C(7)-C(10)-C(8)     | 109.8(4) |
| C(11)-C(10)-C(9)    | 107.5(4) |
| C(7)-C(10)-C(9)     | 109.8(4) |
| C(8)-C(10)-C(9)     | 111.4(5) |
| C(10)-C(11)-H(11A)  | 109.6    |
| C(10)-C(11)-H(11B)  | 109.0    |
| H(11A)-C(11)-H(11B) | 109.5    |
| C(10)-C(11)-H(11C)  | 109.8    |
| H(11A)-C(11)-H(11C) | 109.5    |
| H(11B)-C(11)-H(11C) | 109.4    |
| N(2)-C(12)-C(13)    | 116.0(5) |
| N(2)-C(12)-H(12)    | 121.6    |
| C(13)-C(12)-H(12)   | 122.4    |
| N(3)-C(13)-C(12)    | 114.7(5) |
| N(3)-C(13)-C(14)    | 120.1(6) |
| C(12)-C(13)-C(14)   | 125.2(6) |
| C(15)-C(14)-C(13)   | 120.5(7) |
| C(15)-C(14)-H(14)   | 120.1    |
| C(13)-C(14)-H(14)   | 119.4    |
| C(14)-C(15)-C(16)   | 119.7(7) |
| C(14)-C(15)-H(15)   | 120.3    |
| C(16)-C(15)-H(15)   | 120.0    |
| C(15)-C(16)-C(17)   | 118.4(7) |
| C(15)-C(16)-H(16)   | 121.4    |
| C(17)-C(16)-H(16)   | 120.1    |
| N(3)-C(17)-C(16)    | 122.1(6) |
| N(3)-C(17)-H(17)    | 119.1    |
| C(16)-C(17)-H(17)   | 118.8    |
| C(19)-C(18)-C(23)   | 114.6(5) |
| C(19)-C(18)-B(1)    | 125.0(5) |
| C(23)-C(18)-B(1)    | 120.3(5) |
| C(18)-C(19)-C(20)   | 122.8(6) |
| C(18)-C(19)-H(19)   | 118.8    |
| C(20)-C(19)-H(19)   | 118.5    |
| C(21)-C(20)-C(19)   | 119.8(6) |
| C(21)-C(20)-H(20)   | 120.5    |
| C(19)-C(20)-H(20)   | 119.7    |
| C(20)-C(21)-C(22)   | 120.2(6) |
| C(20)-C(21)-H(21)   | 119.9    |
| C(22)-C(21)-H(21)   | 119.8    |
| C(21)-C(22)-C(23)   | 119.2(6) |
| C(21)-C(22)-H(22)   | 120.8    |
| C(23)-C(22)-H(22)   | 120.0    |
| C(18)-C(23)-C(22)   | 123.3(6) |
| C(18)-C(23)-H(23)   | 118.4    |
| C(22)-C(23)-H(23)   | 118.3    |
| C(29)-C(24)-C(25)   | 116.0(5) |
| C(29)-C(24)-B(1)    | 124.6(4) |
| C(25)-C(24)-B(1)    | 119.4(4) |
| C(24)-C(25)-C(26)   | 121.4(5) |

|                   |          |
|-------------------|----------|
| C(24)-C(25)-H(25) | 119.3    |
| C(26)-C(25)-H(25) | 119.4    |
| C(27)-C(26)-C(25) | 120.2(5) |
| C(27)-C(26)-H(26) | 120.6    |
| C(25)-C(26)-H(26) | 119.2    |
| C(26)-C(27)-C(28) | 120.0(5) |
| C(26)-C(27)-H(27) | 120.1    |
| C(28)-C(27)-H(27) | 119.9    |
| C(27)-C(28)-C(29) | 119.6(5) |
| C(27)-C(28)-H(28) | 120.6    |
| C(29)-C(28)-H(28) | 119.8    |
| C(24)-C(29)-C(28) | 122.8(5) |
| C(24)-C(29)-H(29) | 118.7    |
| C(28)-C(29)-H(29) | 118.5    |
| C(31)-C(30)-C(35) | 115.1(5) |
| C(31)-C(30)-B(1)  | 124.5(5) |
| C(35)-C(30)-B(1)  | 120.1(5) |
| C(30)-C(31)-C(32) | 123.1(6) |
| C(30)-C(31)-H(31) | 118.9    |
| C(32)-C(31)-H(31) | 118.1    |
| C(33)-C(32)-C(31) | 120.4(7) |
| C(33)-C(32)-H(32) | 119.7    |
| C(31)-C(32)-H(32) | 119.9    |
| C(32)-C(33)-C(34) | 120.2(6) |
| C(32)-C(33)-H(33) | 120.4    |
| C(34)-C(33)-H(33) | 119.4    |
| C(35)-C(34)-C(33) | 117.3(7) |
| C(35)-C(34)-H(34) | 121.2    |
| C(33)-C(34)-H(34) | 121.5    |
| C(30)-C(35)-C(34) | 123.8(6) |
| C(30)-C(35)-H(35) | 119.0    |
| C(34)-C(35)-H(35) | 117.2    |
| C(37)-C(36)-C(41) | 113.0(5) |
| C(37)-C(36)-B(1)  | 126.0(4) |
| C(41)-C(36)-B(1)  | 121.0(4) |
| C(36)-C(37)-C(38) | 123.5(5) |
| C(36)-C(37)-H(37) | 118.1    |
| C(38)-C(37)-H(37) | 118.4    |
| C(39)-C(38)-C(37) | 121.5(5) |
| C(39)-C(38)-H(38) | 118.9    |
| C(37)-C(38)-H(38) | 119.5    |
| C(38)-C(39)-C(40) | 117.2(5) |
| C(38)-C(39)-H(39) | 121.6    |
| C(40)-C(39)-H(39) | 121.2    |
| C(41)-C(40)-C(39) | 120.0(5) |
| C(41)-C(40)-H(40) | 120.2    |
| C(39)-C(40)-H(40) | 119.8    |
| C(40)-C(41)-C(36) | 124.7(5) |
| C(40)-C(41)-H(41) | 117.8    |
| C(36)-C(41)-H(41) | 117.5    |
| C(36)-B(1)-C(30)  | 108.6(4) |
| C(36)-B(1)-C(24)  | 111.7(4) |
| C(30)-B(1)-C(24)  | 108.4(4) |
| C(36)-B(1)-C(18)  | 110.2(4) |
| C(30)-B(1)-C(18)  | 109.7(4) |

C(24)-B(1)-C(18)

108.1(4)

---

Symmetry transformations used to generate equivalent atoms:  
#1  $-x+1, y, -z+1/2$

**Table S7.** Anisotropic displacement parameters ( $\text{Å}^2 \times 10^3$ ) for  $[\text{Fe}^{\text{II}}(\text{tame}-(\text{N}_2\text{S}(\text{py})_2)_2(\text{BPh}_4)_2)(1)$ . The anisotropic displacement factor exponent takes the form:

$$-2 \pi^2 [ h^2 a^{*2} U_{11} + \dots + 2 h k a^* b^* U_{12} ]$$

|       | U11   | U22    | U33    | U23    | U13    | U12    |
|-------|-------|--------|--------|--------|--------|--------|
| Fe(1) | 29(1) | 29(1)  | 24(1)  | 0(1)   | 0(1)   | -2(1)  |
| S(1)  | 28(1) | 36(1)  | 24(1)  | 1(1)   | -2(1)  | -6(1)  |
| N(1)  | 31(2) | 38(2)  | 34(2)  | -5(2)  | -2(2)  | 3(2)   |
| N(2)  | 19(2) | 72(3)  | 28(2)  | -3(3)  | -5(2)  | -10(2) |
| N(3)  | 29(2) | 33(3)  | 43(3)  | 10(2)  | -11(2) | -6(2)  |
| N(4)  | 34(2) | 33(3)  | 28(2)  | -4(2)  | 0(2)   | 0(2)   |
| C(1)  | 33(3) | 42(3)  | 26(3)  | -4(3)  | -6(2)  | 5(3)   |
| C(2)  | 38(3) | 61(4)  | 27(3)  | -7(3)  | -2(2)  | 6(3)   |
| C(3)  | 33(3) | 69(4)  | 39(3)  | 2(3)   | 11(3)  | -4(3)  |
| C(4)  | 41(3) | 45(4)  | 45(3)  | 8(3)   | 3(3)   | -13(3) |
| C(5)  | 29(3) | 38(3)  | 28(3)  | 4(2)   | -3(2)  | -5(3)  |
| C(6)  | 30(3) | 28(3)  | 53(4)  | 1(3)   | -1(3)  | -7(3)  |
| C(7)  | 43(3) | 35(3)  | 50(4)  | -21(3) | 4(3)   | -1(3)  |
| C(8)  | 32(3) | 71(4)  | 34(3)  | -21(3) | 3(2)   | -7(3)  |
| C(9)  | 30(3) | 59(4)  | 35(3)  | -5(3)  | 7(2)   | -1(3)  |
| C(10) | 29(3) | 54(4)  | 38(3)  | -26(3) | 1(3)   | -11(3) |
| C(11) | 41(4) | 77(5)  | 65(4)  | -33(4) | 4(3)   | -8(3)  |
| C(12) | 28(3) | 67(4)  | 31(3)  | 23(3)  | -4(3)  | 9(3)   |
| C(13) | 24(3) | 51(4)  | 44(4)  | 26(3)  | -7(2)  | 1(3)   |
| C(14) | 39(4) | 63(5)  | 87(5)  | 37(5)  | 2(4)   | -1(3)  |
| C(15) | 45(4) | 52(5)  | 147(9) | 49(6)  | -20(5) | -2(4)  |
| C(16) | 42(4) | 35(4)  | 107(6) | 1(4)   | -26(4) | 6(3)   |
| C(17) | 43(3) | 37(4)  | 59(4)  | -2(3)  | -14(3) | 0(3)   |
| C(18) | 29(3) | 36(3)  | 30(3)  | -6(2)  | 5(2)   | 0(2)   |
| C(19) | 40(3) | 45(4)  | 60(4)  | -18(3) | 13(3)  | -8(3)  |
| C(20) | 51(4) | 63(5)  | 66(4)  | -23(4) | 29(3)  | -14(3) |
| C(21) | 57(4) | 72(5)  | 54(4)  | -28(4) | 30(3)  | -28(4) |
| C(22) | 67(4) | 49(4)  | 32(3)  | -1(3)  | 6(3)   | -19(3) |
| C(23) | 51(4) | 43(4)  | 37(3)  | 3(3)   | 7(3)   | -7(3)  |
| C(24) | 36(3) | 32(3)  | 23(3)  | 7(2)   | 3(2)   | -7(2)  |
| C(25) | 38(3) | 46(4)  | 31(3)  | -3(3)  | 8(3)   | -7(3)  |
| C(26) | 69(4) | 39(4)  | 30(3)  | -1(3)  | 2(3)   | -14(3) |
| C(27) | 74(5) | 30(3)  | 36(4)  | 3(3)   | 20(3)  | -3(3)  |
| C(28) | 48(3) | 34(3)  | 37(3)  | 9(3)   | 12(3)  | 3(3)   |
| C(29) | 40(3) | 29(3)  | 30(3)  | 8(2)   | 5(2)   | 6(3)   |
| C(30) | 25(3) | 42(3)  | 24(3)  | -4(3)  | 2(2)   | 13(3)  |
| C(31) | 84(5) | 40(4)  | 24(3)  | 0(3)   | -15(3) | 15(3)  |
| C(32) | 91(6) | 65(5)  | 45(4)  | -7(4)  | -19(4) | 28(4)  |
| C(33) | 45(4) | 133(7) | 30(4)  | -22(4) | -13(3) | 28(5)  |
| C(34) | 27(3) | 161(8) | 31(4)  | -10(4) | 6(3)   | -19(4) |
| C(35) | 32(3) | 92(5)  | 23(3)  | 1(3)   | 1(3)   | -3(3)  |
| C(36) | 26(3) | 39(3)  | 27(3)  | 1(3)   | 2(2)   | -1(2)  |
| C(37) | 56(4) | 44(4)  | 30(3)  | 5(3)   | 6(3)   | 20(3)  |
| C(38) | 70(4) | 54(4)  | 32(3)  | 7(3)   | 16(3)  | 27(3)  |
| C(39) | 61(4) | 41(4)  | 43(4)  | 18(3)  | 10(3)  | 16(3)  |

|       |       |       |       |       |      |       |
|-------|-------|-------|-------|-------|------|-------|
| C(40) | 41(3) | 46(4) | 31(3) | -3(3) | 9(2) | -2(3) |
| C(41) | 38(3) | 33(3) | 27(3) | 6(3)  | 5(2) | 7(3)  |
| B(1)  | 28(3) | 38(4) | 26(3) | -2(3) | 4(3) | 8(3)  |

---

**Table S8.** Hydrogen coordinates (  $\times 10^4$ ) and isotropic displacement parameters ( $\text{\AA}^2 \times 10^3$ ) for  $[\text{Fe}^{\text{II}}(\text{tame}-(\text{N}_2\text{S}(\text{py})_2)]_2(\text{BPh}_4)_2$  (**1**).

|        | x    | y    | z    | U (eq) |
|--------|------|------|------|--------|
| H(1)   | 2969 | 3600 | 2598 | 40     |
| H(2)   | 1932 | 3249 | 2980 | 50     |
| H(3)   | 1658 | 2016 | 3027 | 57     |
| H(4)   | 2444 | 1175 | 2667 | 52     |
| H(6)   | 3630 | 952  | 2090 | 44     |
| H(7A)  | 4582 | 902  | 1502 | 51     |
| H(7B)  | 5152 | 1253 | 1937 | 51     |
| H(8A)  | 4572 | 2360 | 313  | 54     |
| H(8B)  | 4056 | 1860 | 688  | 54     |
| H(9A)  | 5775 | 2571 | 879  | 50     |
| H(9B)  | 5975 | 2025 | 1437 | 50     |
| H(11A) | 4956 | 967  | 374  | 73     |
| H(11B) | 5630 | 937  | 779  | 73     |
| H(11C) | 5542 | 1519 | 221  | 73     |
| H(12)  | 4169 | 3531 | 408  | 51     |
| H(14)  | 3998 | 4923 | 661  | 76     |
| H(15)  | 3960 | 5820 | 1426 | 98     |
| H(16)  | 4014 | 5512 | 2541 | 74     |
| H(17)  | 4090 | 4293 | 2833 | 55     |
| H(19)  | 3623 | 3868 | 4452 | 58     |
| H(20)  | 4542 | 4542 | 4091 | 72     |
| H(21)  | 4457 | 5780 | 3981 | 73     |
| H(22)  | 3467 | 6364 | 4264 | 59     |
| H(23)  | 2556 | 5690 | 4629 | 52     |
| H(25)  | 2733 | 4720 | 6019 | 46     |
| H(26)  | 2262 | 5404 | 6863 | 55     |
| H(27)  | 1162 | 5802 | 6794 | 56     |
| H(28)  | 525  | 5526 | 5881 | 47     |
| H(29)  | 994  | 4851 | 5038 | 39     |
| H(31)  | 2011 | 5065 | 3693 | 59     |
| H(32)  | 1188 | 5005 | 2899 | 80     |
| H(33)  | 386  | 4120 | 2931 | 83     |
| H(34)  | 434  | 3209 | 3742 | 88     |
| H(35)  | 1284 | 3270 | 4518 | 59     |
| H(37)  | 2293 | 3462 | 6021 | 52     |
| H(38)  | 2565 | 2286 | 6298 | 62     |
| H(39)  | 2911 | 1456 | 5516 | 58     |
| H(40)  | 3023 | 1866 | 4427 | 47     |
| H(41)  | 2737 | 3021 | 4162 | 39     |



**Table S9.** Crystal data and structure refinement for [Fe<sup>II</sup>(tame-(N<sub>2</sub>S(quino)<sub>2</sub>)<sub>2</sub>)]<sub>2</sub>(BPh<sub>4</sub>)•3MeCN•Et<sub>2</sub>O (**2**).

|                                   |                                                                                                                      |                 |
|-----------------------------------|----------------------------------------------------------------------------------------------------------------------|-----------------|
| Identification code               | bkl_7_040_0m                                                                                                         |                 |
| Empirical formula                 | C <sub>110</sub> H <sub>106.6</sub> B <sub>2</sub> Fe <sub>2</sub> N <sub>12.7</sub> O <sub>0.6</sub> S <sub>2</sub> |                 |
| Formula weight                    | 1814.40                                                                                                              |                 |
| Temperature                       | 100(2) K                                                                                                             |                 |
| Wavelength                        | 0.71073 Å                                                                                                            |                 |
| Crystal system                    | Triclinic                                                                                                            |                 |
| Space group                       | P -1                                                                                                                 |                 |
| Unit cell dimensions              | a = 13.5249(16) Å                                                                                                    | a = 71.249(5)°. |
|                                   | b = 13.6085(16) Å                                                                                                    | b = 66.021(5)°. |
|                                   | c = 14.5700(16) Å                                                                                                    | g = 78.500(6)°. |
| Volume                            | 2312.8(5) Å <sup>3</sup>                                                                                             |                 |
| Z                                 | 1                                                                                                                    |                 |
| Density (calculated)              | 1.303 Mg/m <sup>3</sup>                                                                                              |                 |
| Absorption coefficient            | 0.418 mm <sup>-1</sup>                                                                                               |                 |
| F(000)                            | 955                                                                                                                  |                 |
| Crystal size                      | 0.20 x 0.15 x 0.13 mm <sup>3</sup>                                                                                   |                 |
| Theta range for data collection   | 1.82 to 28.51°.                                                                                                      |                 |
| Index ranges                      | -18<=h<=18, -18<=k<=18, -19<=l<=19                                                                                   |                 |
| Reflections collected             | 128992                                                                                                               |                 |
| Independent reflections           | 11639 [R(int) = 0.0287]                                                                                              |                 |
| Completeness to theta = 25.00°    | 100.0 %                                                                                                              |                 |
| Max. and min. transmission        | 0.9477 and 0.9211                                                                                                    |                 |
| Refinement method                 | Full-matrix least-squares on F <sup>2</sup>                                                                          |                 |
| Data / restraints / parameters    | 11639 / 18 / 619                                                                                                     |                 |
| Goodness-of-fit on F <sup>2</sup> | 1.035                                                                                                                |                 |
| Final R indices [I>2sigma(I)]     | R1 = 0.0317, wR2 = 0.0811                                                                                            |                 |
| R indices (all data)              | R1 = 0.0363, wR2 = 0.0855                                                                                            |                 |
| Largest diff. peak and hole       | 0.401 and -0.524 e.Å <sup>-3</sup>                                                                                   |                 |

**Table S10.** Atomic coordinates ( $\times 10^4$ ) and equivalent isotropic displacement parameters ( $\text{\AA}^2 \times 10^3$ ) for  $[\text{Fe}^{\text{II}}(\text{tame}-(\text{N}_2\text{S}(\text{quino})_2)]_2(\text{BPh}_4) \cdot 3\text{MeCN} \cdot \text{Et}_2\text{O}$  (**2**).  $U(\text{eq})$  is defined as one third of the trace of the orthogonalized  $U^{\text{ij}}$  tensor.

|       | x        | y        | z       | U(eq) |
|-------|----------|----------|---------|-------|
| C(1)  | 1385(1)  | 7850(1)  | 4339(1) | 18(1) |
| C(2)  | 658(1)   | 7515(1)  | 5487(1) | 18(1) |
| C(3)  | 759(1)   | 6317(1)  | 5766(1) | 23(1) |
| C(4)  | 531(1)   | 12116(1) | 4323(1) | 19(1) |
| C(5)  | 2354(1)  | 10278(1) | 2419(1) | 19(1) |
| C(6)  | 2339(1)  | 9302(1)  | 3197(1) | 18(1) |
| C(7)  | -1055(1) | 12216(1) | 3785(1) | 18(1) |
| C(8)  | -1844(1) | 10799(1) | 3832(1) | 18(1) |
| C(9)  | -1696(1) | 9824(1)  | 3583(1) | 17(1) |
| C(10) | -2562(1) | 9372(1)  | 3607(1) | 20(1) |
| C(11) | -2340(1) | 8495(1)  | 3277(1) | 21(1) |
| C(12) | -1247(1) | 8110(1)  | 2844(1) | 19(1) |
| C(13) | -964(1)  | 7265(1)  | 2401(1) | 25(1) |
| C(14) | 99(1)    | 6963(1)  | 1913(1) | 28(1) |
| C(15) | 927(1)   | 7503(1)  | 1837(1) | 25(1) |
| C(16) | 686(1)   | 8307(1)  | 2284(1) | 21(1) |
| C(17) | -407(1)  | 8618(1)  | 2817(1) | 17(1) |
| C(18) | 3332(1)  | 10697(1) | 1671(1) | 23(1) |
| C(19) | 3293(1)  | 11542(1) | 871(1)  | 24(1) |
| C(20) | 2279(1)  | 11951(1) | 779(1)  | 22(1) |
| C(21) | 2194(1)  | 12781(1) | -77(1)  | 27(1) |
| C(22) | 1212(1)  | 13123(1) | -176(1) | 28(1) |
| C(23) | 274(1)   | 12630(1) | 561(1)  | 25(1) |
| C(24) | 322(1)   | 11835(1) | 1409(1) | 21(1) |
| C(25) | 1319(1)  | 11492(1) | 1553(1) | 19(1) |
| C(26) | 7627(1)  | 3964(1)  | 2196(1) | 35(1) |
| C(27) | 7580(1)  | 4870(1)  | 2449(1) | 31(1) |
| C(28) | 6643(1)  | 5547(1)  | 2594(1) | 25(1) |
| C(29) | 5712(1)  | 5341(1)  | 2507(1) | 22(1) |
| C(30) | 4476(1)  | 6703(1)  | 1502(1) | 22(1) |
| C(31) | 4869(1)  | 6237(1)  | 680(1)  | 30(1) |
| C(32) | 4691(1)  | 6695(1)  | -252(1) | 36(1) |
| C(33) | 4121(1)  | 7652(1)  | -412(1) | 34(1) |
| C(34) | 3890(1)  | 7672(1)  | 1311(1) | 29(1) |
| C(35) | 3718(1)  | 8143(1)  | 380(1)  | 34(1) |
| C(36) | 6714(1)  | 3710(1)  | 2137(1) | 36(1) |
| C(37) | 4644(1)  | 7019(1)  | 3177(1) | 20(1) |
| C(38) | 4240(1)  | 6878(1)  | 4259(1) | 22(1) |

|        |          |          |          |       |
|--------|----------|----------|----------|-------|
| C(39)  | 4308(1)  | 7610(1)  | 4713(1)  | 25(1) |
| C(40)  | 4767(1)  | 8537(1)  | 4094(1)  | 26(1) |
| C(41)  | 5191(1)  | 8704(1)  | 3019(1)  | 25(1) |
| C(42)  | 5142(1)  | 7953(1)  | 2579(1)  | 22(1) |
| C(43)  | 3569(1)  | 5428(1)  | 3395(1)  | 21(1) |
| C(44)  | 2623(1)  | 5518(1)  | 3191(1)  | 25(1) |
| C(45)  | 1754(1)  | 4909(1)  | 3851(1)  | 29(1) |
| C(46)  | 1799(1)  | 4194(1)  | 4757(1)  | 29(1) |
| C(47)  | 2724(1)  | 4079(1)  | 4986(1)  | 28(1) |
| C(48)  | 3593(1)  | 4673(1)  | 4312(1)  | 25(1) |
| B(2)   | 5777(1)  | 4385(1)  | 2302(1)  | 30(1) |
| N(1)   | 1390(1)  | 8963(1)  | 3783(1)  | 16(1) |
| N(2)   | 1363(1)  | 10686(1) | 2402(1)  | 17(1) |
| N(3)   | -988(1)  | 11120(1) | 3800(1)  | 16(1) |
| N(4)   | -650(1)  | 9434(1)  | 3261(1)  | 16(1) |
| N(5)   | 553(2)   | 4471(2)  | 1556(2)  | 65(1) |
| C(49)  | 1437(3)  | 4616(3)  | 1214(3)  | 49(1) |
| C(50)  | 2581(3)  | 4822(3)  | 765(3)   | 64(1) |
| N(5B)  | 1141(11) | 4005(9)  | 1899(9)  | 49(1) |
| C(49B) | 1754(13) | 4569(13) | 1282(17) | 49(1) |
| C(50B) | 2507(15) | 5326(11) | 524(13)  | 49(1) |
| N(5C)  | 1818(8)  | 3749(7)  | 1995(6)  | 49(1) |
| C(49C) | 2011(12) | 4418(9)  | 1263(10) | 49(1) |
| C(50C) | 2247(11) | 5229(9)  | 303(8)   | 49(1) |
| N(7)   | 1748(4)  | 8814(3)  | -1163(3) | 48(1) |
| C(53)  | 1636(7)  | 9491(7)  | -827(9)  | 48(1) |
| C(54)  | 1501(5)  | 10344(4) | -387(4)  | 48(1) |
| C(55)  | -2012(5) | 9685(4)  | 651(4)   | 41(1) |
| C(56)  | -1057(4) | 10189(4) | 516(4)   | 41(1) |
| O(1)   | -107(2)  | 9657(3)  | -69(3)   | 41(1) |
| C(57)  | 876(4)   | 10064(4) | -268(4)  | 41(1) |
| C(58)  | 1789(6)  | 9435(7)  | -887(9)  | 41(1) |
| N(6)   | -5332(1) | 8762(1)  | 6515(2)  | 51(1) |
| C(51)  | -4549(1) | 8313(1)  | 6575(1)  | 32(1) |
| C(52)  | -3549(1) | 7744(1)  | 6653(2)  | 40(1) |
| B(1)   | 4605(1)  | 6135(1)  | 2640(1)  | 20(1) |
| S(1)   | 867(1)   | 10727(1) | 4594(1)  | 14(1) |
| Fe(1)  | 209(1)   | 10042(1) | 3743(1)  | 14(1) |

---

**Table S11.** Bond lengths [Å] and angles [°] for [Fe<sup>II</sup>(tame-(N<sub>2</sub>S(quino)<sub>2</sub>)]<sub>2</sub>(BPh<sub>4</sub>)•3MeCN•Et<sub>2</sub>O (**2**).

---

|             |            |
|-------------|------------|
| Fe(1)-N(1)  | 1.9489(10) |
| Fe(1)-N(3)  | 1.9964(10) |
| Fe(1)-N(2)  | 1.9491(10) |
| Fe(1)-N(4)  | 1.9868(10) |
| Fe(1)-S(1)  | 2.2734(3)  |
| Fe(1')-S(1) | 2.2789(4)  |
| Fe(1)-S(1') | 2.2789(4)  |
| C(1)-N(1)   | 1.4697(15) |
| C(1)-C(2)   | 1.5241(17) |
| C(1)-H(1A)  | 0.9900     |
| C(1)-H(1B)  | 0.9900     |
| C(2)-C(4')  | 1.5231(16) |
| C(2)-C(7')  | 1.5305(16) |
| C(2)-C(3)   | 1.5395(17) |
| C(3)-H(3A)  | 0.9800     |
| C(3)-H(3B)  | 0.9800     |
| C(3)-H(3C)  | 0.9800     |
| C(4)-C(2')  | 1.5232(16) |
| C(4)-S(1)   | 1.8051(13) |
| C(4)-H(4A)  | 0.9900     |
| C(4)-H(4B)  | 0.9900     |
| C(5)-N(2)   | 1.3520(16) |
| C(5)-C(18)  | 1.4115(17) |
| C(5)-C(6)   | 1.4394(18) |
| C(6)-N(1)   | 1.2967(15) |
| C(6)-H(6)   | 0.9500     |
| C(7)-N(3)   | 1.4699(15) |
| C(7)-C(2')  | 1.5305(16) |
| C(7)-H(7A)  | 0.9900     |
| C(7)-H(7B)  | 0.9900     |
| C(8)-N(3)   | 1.2963(15) |
| C(8)-C(9)   | 1.4407(17) |
| C(8)-H(8)   | 0.9500     |
| C(9)-N(4)   | 1.3511(15) |
| C(9)-C(10)  | 1.4104(16) |
| C(10)-C(11) | 1.3623(18) |
| C(10)-H(10) | 0.9500     |
| C(11)-C(12) | 1.4151(18) |
| C(11)-H(11) | 0.9500     |
| C(12)-C(13) | 1.4105(18) |
| C(12)-C(17) | 1.4237(16) |
| C(13)-C(14) | 1.365(2)   |
| C(13)-H(13) | 0.9500     |

|             |            |
|-------------|------------|
| C(14)-C(15) | 1.4080(19) |
| C(14)-H(14) | 0.9500     |
| C(15)-C(16) | 1.3688(18) |
| C(15)-H(15) | 0.9500     |
| C(16)-C(17) | 1.4133(17) |
| C(16)-H(16) | 0.9500     |
| C(17)-N(4)  | 1.3792(15) |
| C(18)-C(19) | 1.360(2)   |
| C(18)-H(18) | 0.9500     |
| C(19)-C(20) | 1.4163(19) |
| C(19)-H(19) | 0.9500     |
| C(20)-C(21) | 1.4150(19) |
| C(20)-C(25) | 1.4247(17) |
| C(21)-C(22) | 1.366(2)   |
| C(21)-H(21) | 0.9500     |
| C(22)-C(23) | 1.408(2)   |
| C(22)-H(22) | 0.9500     |
| C(23)-C(24) | 1.3712(18) |
| C(23)-H(23) | 0.9500     |
| C(24)-C(25) | 1.4124(17) |
| C(24)-H(24) | 0.9500     |
| C(25)-N(2)  | 1.3776(16) |
| C(26)-C(27) | 1.379(2)   |
| C(26)-C(36) | 1.389(2)   |
| C(26)-H(26) | 0.9500     |
| C(27)-C(28) | 1.3933(19) |
| C(27)-H(27) | 0.9500     |
| C(28)-C(29) | 1.4044(18) |
| C(28)-H(28) | 0.9500     |
| C(29)-B(2)  | 1.405(2)   |
| C(29)-B(1)  | 1.6435(19) |
| C(30)-C(31) | 1.3979(19) |
| C(30)-C(34) | 1.404(2)   |
| C(30)-B(1)  | 1.6540(19) |
| C(31)-C(32) | 1.397(2)   |
| C(31)-H(31) | 0.9500     |
| C(32)-C(33) | 1.377(3)   |
| C(32)-H(32) | 0.9500     |
| C(33)-C(35) | 1.383(2)   |
| C(33)-H(33) | 0.9500     |
| C(34)-C(35) | 1.394(2)   |
| C(34)-H(34) | 0.9500     |
| C(35)-H(35) | 0.9500     |
| C(36)-B(2)  | 1.392(2)   |
| C(36)-H(36) | 0.9500     |
| C(37)-C(38) | 1.4024(18) |

|               |            |
|---------------|------------|
| C(37)-C(42)   | 1.4072(18) |
| C(37)-B(1)    | 1.6507(19) |
| C(38)-C(39)   | 1.3953(18) |
| C(38)-H(38)   | 0.9500     |
| C(39)-C(40)   | 1.384(2)   |
| C(39)-H(39)   | 0.9500     |
| C(40)-C(41)   | 1.388(2)   |
| C(40)-H(40)   | 0.9500     |
| C(41)-C(42)   | 1.3941(19) |
| C(41)-H(41)   | 0.9500     |
| C(42)-H(42)   | 0.9500     |
| C(43)-C(44)   | 1.4017(18) |
| C(43)-C(48)   | 1.4068(19) |
| C(43)-B(1)    | 1.6441(19) |
| C(44)-C(45)   | 1.3963(19) |
| C(44)-H(44)   | 0.9500     |
| C(45)-C(46)   | 1.381(2)   |
| C(45)-H(45)   | 0.9500     |
| C(46)-C(47)   | 1.388(2)   |
| C(46)-H(46)   | 0.9500     |
| C(47)-C(48)   | 1.3892(19) |
| C(47)-H(47)   | 0.9500     |
| C(48)-H(48)   | 0.9500     |
| B(2)-H(2)     | 0.9500     |
| N(5)-C(49)    | 1.123(4)   |
| C(49)-C(50)   | 1.461(4)   |
| C(50)-H(50A)  | 0.9800     |
| C(50)-H(50B)  | 0.9800     |
| C(50)-H(50C)  | 0.9800     |
| N(5B)-C(49B)  | 1.135(2)   |
| C(49B)-C(50B) | 1.446(2)   |
| C(50B)-H(50D) | 0.9800     |
| C(50B)-H(50E) | 0.9800     |
| C(50B)-H(50F) | 0.9800     |
| N(5C)-C(49C)  | 1.132(11)  |
| C(49C)-C(50C) | 1.435(12)  |
| C(50C)-H(50G) | 0.9800     |
| C(50C)-H(50H) | 0.9800     |
| C(50C)-H(50I) | 0.9800     |
| N(7)-C(53)    | 1.134(2)   |
| N(7)-H(58B)   | 0.8729     |
| N(7)-H(58C)   | 1.0151     |
| C(53)-C(54)   | 1.445(2)   |
| C(53)-H(58A)  | 1.1222     |
| C(53)-H(58B)  | 1.0002     |
| C(53)-H(58C)  | 1.0468     |

|                  |            |
|------------------|------------|
| C(54)-H(54A)     | 0.9800     |
| C(54)-H(54B)     | 0.9800     |
| C(54)-H(54C)     | 0.9800     |
| C(54)-H(57A)     | 1.0826     |
| C(54)-H(57B)     | 1.0804     |
| C(54)-H(58A)     | 1.5863     |
| C(55)-C(58)#2    | 1.462(8)   |
| C(55)-C(57)#2    | 1.475(8)   |
| C(55)-C(56)      | 1.496(6)   |
| C(55)-H(55A)     | 0.9800     |
| C(55)-H(55B)     | 0.9800     |
| C(55)-H(55C)     | 0.9800     |
| C(56)-C(57)#2    | 0.532(6)   |
| C(56)-C(58)#2    | 1.037(9)   |
| C(56)-O(1)       | 1.427(4)   |
| C(56)-O(1)#2     | 1.468(7)   |
| C(56)-H(56A)     | 0.9900     |
| C(56)-H(56B)     | 0.9900     |
| O(1)-C(57)#2     | 1.008(6)   |
| O(1)-O(1)#2      | 1.127(7)   |
| O(1)-C(57)       | 1.427(4)   |
| O(1)-C(56)#2     | 1.468(7)   |
| C(57)-C(56)#2    | 0.532(6)   |
| C(57)-O(1)#2     | 1.008(6)   |
| C(57)-C(55)#2    | 1.475(8)   |
| C(57)-C(58)      | 1.496(6)   |
| C(57)-H(57A)     | 0.9900     |
| C(57)-H(57B)     | 0.9900     |
| C(58)-C(56)#2    | 1.037(9)   |
| C(58)-C(55)#2    | 1.462(8)   |
| C(58)-H(58A)     | 0.9800     |
| C(58)-H(58B)     | 0.9800     |
| C(58)-H(58C)     | 0.9800     |
| N(6)-C(51)       | 1.134(2)   |
| C(51)-C(52)      | 1.446(2)   |
| C(52)-H(52A)     | 0.9800     |
| C(52)-H(52B)     | 0.9800     |
| C(52)-H(52C)     | 0.9800     |
|                  |            |
| N(1)-C(1)-C(2)   | 119.10(10) |
| N(1)-C(1)-H(1A)  | 107.5      |
| C(2)-C(1)-H(1A)  | 107.5      |
| N(1)-C(1)-H(1B)  | 107.5      |
| C(2)-C(1)-H(1B)  | 107.5      |
| H(1A)-C(1)-H(1B) | 107.0      |
| C(4)#1-C(2)-C(1) | 112.48(10) |

|                    |            |
|--------------------|------------|
| C(4)#1-C(2)-C(7)#1 | 112.10(10) |
| C(1)-C(2)-C(7)#1   | 113.80(10) |
| C(4)#1-C(2)-C(3)   | 107.92(10) |
| C(1)-C(2)-C(3)     | 104.60(10) |
| C(7)#1-C(2)-C(3)   | 105.20(10) |
| C(2)-C(3)-H(3A)    | 109.5      |
| C(2)-C(3)-H(3B)    | 109.5      |
| H(3A)-C(3)-H(3B)   | 109.5      |
| C(2)-C(3)-H(3C)    | 109.5      |
| H(3A)-C(3)-H(3C)   | 109.5      |
| H(3B)-C(3)-H(3C)   | 109.5      |
| C(2)#1-C(4)-S(1)   | 116.63(8)  |
| C(2)#1-C(4)-H(4A)  | 108.1      |
| S(1)-C(4)-H(4A)    | 108.1      |
| C(2)#1-C(4)-H(4B)  | 108.1      |
| S(1)-C(4)-H(4B)    | 108.1      |
| H(4A)-C(4)-H(4B)   | 107.3      |
| N(2)-C(5)-C(18)    | 123.54(12) |
| N(2)-C(5)-C(6)     | 113.93(10) |
| C(18)-C(5)-C(6)    | 122.14(11) |
| N(1)-C(6)-C(5)     | 116.00(11) |
| N(1)-C(6)-H(6)     | 122.0      |
| C(5)-C(6)-H(6)     | 122.0      |
| N(3)-C(7)-C(2)#1   | 118.99(10) |
| N(3)-C(7)-H(7A)    | 107.6      |
| C(2)#1-C(7)-H(7A)  | 107.6      |
| N(3)-C(7)-H(7B)    | 107.6      |
| C(2)#1-C(7)-H(7B)  | 107.6      |
| H(7A)-C(7)-H(7B)   | 107.0      |
| N(3)-C(8)-C(9)     | 116.22(11) |
| N(3)-C(8)-H(8)     | 121.9      |
| C(9)-C(8)-H(8)     | 121.9      |
| N(4)-C(9)-C(10)    | 123.99(11) |
| N(4)-C(9)-C(8)     | 113.54(10) |
| C(10)-C(9)-C(8)    | 122.33(11) |
| C(11)-C(10)-C(9)   | 118.73(11) |
| C(11)-C(10)-H(10)  | 120.6      |
| C(9)-C(10)-H(10)   | 120.6      |
| C(10)-C(11)-C(12)  | 119.34(11) |
| C(10)-C(11)-H(11)  | 120.3      |
| C(12)-C(11)-H(11)  | 120.3      |
| C(13)-C(12)-C(11)  | 121.75(11) |
| C(13)-C(12)-C(17)  | 119.10(12) |
| C(11)-C(12)-C(17)  | 119.09(11) |
| C(14)-C(13)-C(12)  | 120.64(12) |
| C(14)-C(13)-H(13)  | 119.7      |



|                   |            |
|-------------------|------------|
| C(12)-C(13)-H(13) | 119.7      |
| C(13)-C(14)-C(15) | 120.12(13) |
| C(13)-C(14)-H(14) | 119.9      |
| C(15)-C(14)-H(14) | 119.9      |
| C(16)-C(15)-C(14) | 120.93(12) |
| C(16)-C(15)-H(15) | 119.5      |
| C(14)-C(15)-H(15) | 119.5      |
| C(15)-C(16)-C(17) | 120.04(12) |
| C(15)-C(16)-H(16) | 120.0      |
| C(17)-C(16)-H(16) | 120.0      |
| N(4)-C(17)-C(16)  | 120.02(11) |
| N(4)-C(17)-C(12)  | 120.90(11) |
| C(16)-C(17)-C(12) | 119.03(11) |
| C(19)-C(18)-C(5)  | 119.10(12) |
| C(19)-C(18)-H(18) | 120.4      |
| C(5)-C(18)-H(18)  | 120.4      |
| C(18)-C(19)-C(20) | 119.36(12) |
| C(18)-C(19)-H(19) | 120.3      |
| C(20)-C(19)-H(19) | 120.3      |
| C(21)-C(20)-C(19) | 122.01(12) |
| C(21)-C(20)-C(25) | 118.95(12) |
| C(19)-C(20)-C(25) | 119.01(12) |
| C(22)-C(21)-C(20) | 120.77(12) |
| C(22)-C(21)-H(21) | 119.6      |
| C(20)-C(21)-H(21) | 119.6      |
| C(21)-C(22)-C(23) | 120.14(13) |
| C(21)-C(22)-H(22) | 119.9      |
| C(23)-C(22)-H(22) | 119.9      |
| C(24)-C(23)-C(22) | 120.67(13) |
| C(24)-C(23)-H(23) | 119.7      |
| C(22)-C(23)-H(23) | 119.7      |
| C(23)-C(24)-C(25) | 120.42(12) |
| C(23)-C(24)-H(24) | 119.8      |
| C(25)-C(24)-H(24) | 119.8      |
| N(2)-C(25)-C(24)  | 120.07(11) |
| N(2)-C(25)-C(20)  | 120.93(11) |
| C(24)-C(25)-C(20) | 118.91(12) |
| C(27)-C(26)-C(36) | 119.22(14) |
| C(27)-C(26)-H(26) | 120.4      |
| C(36)-C(26)-H(26) | 120.4      |
| C(26)-C(27)-C(28) | 120.33(14) |
| C(26)-C(27)-H(27) | 119.8      |
| C(28)-C(27)-H(27) | 119.8      |
| C(27)-C(28)-C(29) | 122.47(14) |
| C(27)-C(28)-H(28) | 118.8      |
| C(29)-C(28)-H(28) | 118.8      |

|                   |            |
|-------------------|------------|
| C(28)-C(29)-B(2)  | 115.25(12) |
| C(28)-C(29)-B(1)  | 123.92(12) |
| B(2)-C(29)-B(1)   | 120.82(12) |
| C(31)-C(30)-C(34) | 114.38(13) |
| C(31)-C(30)-B(1)  | 123.44(12) |
| C(34)-C(30)-B(1)  | 122.04(11) |
| C(32)-C(31)-C(30) | 122.87(15) |
| C(32)-C(31)-H(31) | 118.6      |
| C(30)-C(31)-H(31) | 118.6      |
| C(33)-C(32)-C(31) | 120.89(14) |
| C(33)-C(32)-H(32) | 119.6      |
| C(31)-C(32)-H(32) | 119.6      |
| C(32)-C(33)-C(35) | 118.24(14) |
| C(32)-C(33)-H(33) | 120.9      |
| C(35)-C(33)-H(33) | 120.9      |
| C(35)-C(34)-C(30) | 123.31(14) |
| C(35)-C(34)-H(34) | 118.3      |
| C(30)-C(34)-H(34) | 118.3      |
| C(33)-C(35)-C(34) | 120.31(15) |
| C(33)-C(35)-H(35) | 119.8      |
| C(34)-C(35)-H(35) | 119.8      |
| C(26)-C(36)-B(2)  | 119.79(15) |
| C(26)-C(36)-H(36) | 120.1      |
| B(2)-C(36)-H(36)  | 120.1      |
| C(38)-C(37)-C(42) | 114.77(12) |
| C(38)-C(37)-B(1)  | 123.02(11) |
| C(42)-C(37)-B(1)  | 122.12(11) |
| C(39)-C(38)-C(37) | 122.97(12) |
| C(39)-C(38)-H(38) | 118.5      |
| C(37)-C(38)-H(38) | 118.5      |
| C(40)-C(39)-C(38) | 120.36(13) |
| C(40)-C(39)-H(39) | 119.8      |
| C(38)-C(39)-H(39) | 119.8      |
| C(39)-C(40)-C(41) | 118.63(13) |
| C(39)-C(40)-H(40) | 120.7      |
| C(41)-C(40)-H(40) | 120.7      |
| C(40)-C(41)-C(42) | 120.26(13) |
| C(40)-C(41)-H(41) | 119.9      |
| C(42)-C(41)-H(41) | 119.9      |
| C(41)-C(42)-C(37) | 122.92(13) |
| C(41)-C(42)-H(42) | 118.5      |
| C(37)-C(42)-H(42) | 118.5      |
| C(44)-C(43)-C(48) | 115.50(12) |
| C(44)-C(43)-B(1)  | 124.07(12) |
| C(48)-C(43)-B(1)  | 120.44(11) |
| C(45)-C(44)-C(43) | 122.73(13) |

|                      |            |
|----------------------|------------|
| C(45)-C(44)-H(44)    | 118.6      |
| C(43)-C(44)-H(44)    | 118.6      |
| C(46)-C(45)-C(44)    | 119.96(14) |
| C(46)-C(45)-H(45)    | 120.0      |
| C(44)-C(45)-H(45)    | 120.0      |
| C(45)-C(46)-C(47)    | 119.08(13) |
| C(45)-C(46)-H(46)    | 120.5      |
| C(47)-C(46)-H(46)    | 120.5      |
| C(46)-C(47)-C(48)    | 120.47(14) |
| C(46)-C(47)-H(47)    | 119.8      |
| C(48)-C(47)-H(47)    | 119.8      |
| C(47)-C(48)-C(43)    | 122.23(13) |
| C(47)-C(48)-H(48)    | 118.9      |
| C(43)-C(48)-H(48)    | 118.9      |
| C(36)-B(2)-C(29)     | 122.82(14) |
| C(36)-B(2)-H(2)      | 118.6      |
| C(29)-B(2)-H(2)      | 118.6      |
| C(6)-N(1)-C(1)       | 115.75(10) |
| C(6)-N(1)-Fe(1)      | 112.83(8)  |
| C(1)-N(1)-Fe(1)      | 131.41(8)  |
| C(5)-N(2)-C(25)      | 117.66(10) |
| C(5)-N(2)-Fe(1)      | 110.07(8)  |
| C(25)-N(2)-Fe(1)     | 132.01(8)  |
| C(8)-N(3)-C(7)       | 116.46(10) |
| C(8)-N(3)-Fe(1)      | 112.85(8)  |
| C(7)-N(3)-Fe(1)      | 130.66(8)  |
| C(9)-N(4)-C(17)      | 117.23(10) |
| C(9)-N(4)-Fe(1)      | 110.12(8)  |
| C(17)-N(4)-Fe(1)     | 131.87(8)  |
| N(5)-C(49)-C(50)     | 179.1(4)   |
| N(5B)-C(49B)-C(50B)  | 177(2)     |
| C(49B)-C(50B)-H(50D) | 109.5      |
| C(49B)-C(50B)-H(50E) | 109.5      |
| H(50D)-C(50B)-H(50E) | 109.5      |
| C(49B)-C(50B)-H(50F) | 109.5      |
| H(50D)-C(50B)-H(50F) | 109.5      |
| H(50E)-C(50B)-H(50F) | 109.5      |
| N(5C)-C(49C)-C(50C)  | 176.6(16)  |
| C(53)-N(7)-H(58B)    | 58.0       |
| C(53)-N(7)-H(58C)    | 58.0       |
| H(58B)-N(7)-H(58C)   | 115.7      |
| N(7)-C(53)-C(54)     | 179.1(12)  |
| N(7)-C(53)-H(58A)    | 104.5      |
| C(54)-C(53)-H(58A)   | 75.1       |
| N(7)-C(53)-H(58B)    | 47.8       |
| C(54)-C(53)-H(58B)   | 133.0      |

|                       |           |
|-----------------------|-----------|
| H(58A)-C(53)-H(58B)   | 97.7      |
| N(7)-C(53)-H(58C)     | 55.3      |
| C(54)-C(53)-H(58C)    | 123.9     |
| H(58A)-C(53)-H(58C)   | 95.0      |
| H(58B)-C(53)-H(58C)   | 102.8     |
| C(53)-C(54)-H(57A)    | 98.6      |
| H(54A)-C(54)-H(57A)   | 30.5      |
| H(54B)-C(54)-H(57A)   | 87.6      |
| H(54C)-C(54)-H(57A)   | 138.9     |
| C(53)-C(54)-H(57B)    | 97.0      |
| H(54A)-C(54)-H(57B)   | 121.2     |
| H(54B)-C(54)-H(57B)   | 14.0      |
| H(54C)-C(54)-H(57B)   | 109.2     |
| H(57A)-C(54)-H(57B)   | 96.0      |
| C(53)-C(54)-H(58A)    | 43.1      |
| H(54A)-C(54)-H(58A)   | 113.6     |
| H(54B)-C(54)-H(58A)   | 134.9     |
| H(54C)-C(54)-H(58A)   | 67.9      |
| H(57A)-C(54)-H(58A)   | 125.1     |
| H(57B)-C(54)-H(58A)   | 121.2     |
| C(58)#2-C(55)-C(57)#2 | 61.2(3)   |
| C(58)#2-C(55)-C(56)   | 41.0(3)   |
| C(57)#2-C(55)-C(56)   | 20.6(3)   |
| C(58)#2-C(55)-H(55A)  | 68.8      |
| C(57)#2-C(55)-H(55A)  | 130.0     |
| C(56)-C(55)-H(55A)    | 109.7     |
| C(58)#2-C(55)-H(55B)  | 126.0     |
| C(57)#2-C(55)-H(55B)  | 101.3     |
| C(56)-C(55)-H(55B)    | 109.3     |
| H(55A)-C(55)-H(55B)   | 109.5     |
| C(58)#2-C(55)-H(55C)  | 122.1     |
| C(57)#2-C(55)-H(55C)  | 95.5      |
| C(56)-C(55)-H(55C)    | 109.3     |
| H(55A)-C(55)-H(55C)   | 109.5     |
| H(55B)-C(55)-H(55C)   | 109.5     |
| C(57)#2-C(56)-C(58)#2 | 142.9(11) |
| C(57)#2-C(56)-O(1)    | 30.8(7)   |
| C(58)#2-C(56)-O(1)    | 173.4(7)  |
| C(57)#2-C(56)-O(1)#2  | 75.1(7)   |
| C(58)#2-C(56)-O(1)#2  | 138.9(5)  |
| O(1)-C(56)-O(1)#2     | 45.8(3)   |
| C(57)#2-C(56)-C(55)   | 77.5(8)   |
| C(58)#2-C(56)-C(55)   | 67.7(6)   |
| O(1)-C(56)-C(55)      | 107.1(3)  |
| O(1)#2-C(56)-C(55)    | 152.6(4)  |
| C(57)#2-C(56)-H(56A)  | 114.1     |

|                       |           |
|-----------------------|-----------|
| C(58)#2-C(56)-H(56A)  | 68.9      |
| O(1)-C(56)-H(56A)     | 110.4     |
| O(1)#2-C(56)-H(56A)   | 81.8      |
| C(55)-C(56)-H(56A)    | 110.2     |
| C(57)#2-C(56)-H(56B)  | 130.5     |
| C(58)#2-C(56)-H(56B)  | 75.7      |
| O(1)-C(56)-H(56B)     | 110.4     |
| O(1)#2-C(56)-H(56B)   | 87.6      |
| C(55)-C(56)-H(56B)    | 110.2     |
| H(56A)-C(56)-H(56B)   | 108.6     |
| C(57)#2-O(1)-O(1)#2   | 83.7(4)   |
| C(57)#2-O(1)-C(57)    | 128.3(4)  |
| O(1)#2-O(1)-C(57)     | 44.6(3)   |
| C(57)#2-O(1)-C(56)    | 15.7(4)   |
| O(1)#2-O(1)-C(56)     | 69.0(4)   |
| C(57)-O(1)-C(56)      | 113.4(4)  |
| C(57)#2-O(1)-C(56)#2  | 148.3(5)  |
| O(1)#2-O(1)-C(56)#2   | 65.2(3)   |
| C(57)-O(1)-C(56)#2    | 21.1(3)   |
| C(56)-O(1)-C(56)#2    | 134.2(3)  |
| C(56)#2-C(57)-O(1)#2  | 133.5(10) |
| C(56)#2-C(57)-O(1)    | 83.8(8)   |
| O(1)#2-C(57)-O(1)     | 51.7(4)   |
| C(56)#2-C(57)-C(55)#2 | 81.9(7)   |
| O(1)#2-C(57)-C(55)#2  | 141.8(5)  |
| O(1)-C(57)-C(55)#2    | 165.7(4)  |
| C(56)#2-C(57)-C(58)   | 24.7(7)   |
| O(1)#2-C(57)-C(58)    | 158.1(5)  |
| O(1)-C(57)-C(58)      | 107.0(3)  |
| C(55)#2-C(57)-C(58)   | 58.9(4)   |
| C(56)#2-C(57)-H(57A)  | 128.3     |
| O(1)#2-C(57)-H(57A)   | 85.3      |
| O(1)-C(57)-H(57A)     | 110.4     |
| C(55)#2-C(57)-H(57A)  | 79.1      |
| C(58)-C(57)-H(57A)    | 110.3     |
| C(56)#2-C(57)-H(57B)  | 112.1     |
| O(1)#2-C(57)-H(57B)   | 77.5      |
| O(1)-C(57)-H(57B)     | 110.4     |
| C(55)#2-C(57)-H(57B)  | 74.9      |
| C(58)-C(57)-H(57B)    | 110.1     |
| H(57A)-C(57)-H(57B)   | 108.6     |
| C(56)#2-C(58)-C(55)#2 | 71.3(4)   |
| C(56)#2-C(58)-C(57)   | 12.4(4)   |
| C(55)#2-C(58)-C(57)   | 59.8(4)   |
| C(56)#2-C(58)-H(58A)  | 120.9     |
| C(55)#2-C(58)-H(58A)  | 49.9      |

|                      |            |
|----------------------|------------|
| C(57)-C(58)-H(58A)   | 109.8      |
| C(56)#2-C(58)-H(58B) | 99.2       |
| C(55)#2-C(58)-H(58B) | 125.9      |
| C(57)-C(58)-H(58B)   | 109.4      |
| H(58A)-C(58)-H(58B)  | 109.5      |
| C(56)#2-C(58)-H(58C) | 107.6      |
| C(55)#2-C(58)-H(58C) | 124.3      |
| C(57)-C(58)-H(58C)   | 109.2      |
| H(58A)-C(58)-H(58C)  | 109.5      |
| H(58B)-C(58)-H(58C)  | 109.5      |
| N(6)-C(51)-C(52)     | 179.82(18) |
| C(51)-C(52)-H(52A)   | 109.5      |
| C(51)-C(52)-H(52B)   | 109.5      |
| H(52A)-C(52)-H(52B)  | 109.5      |
| C(51)-C(52)-H(52C)   | 109.5      |
| H(52A)-C(52)-H(52C)  | 109.5      |
| H(52B)-C(52)-H(52C)  | 109.5      |
| C(29)-B(1)-C(43)     | 107.20(11) |
| C(29)-B(1)-C(37)     | 109.31(10) |
| C(43)-B(1)-C(37)     | 110.60(10) |
| C(29)-B(1)-C(30)     | 111.02(10) |
| C(43)-B(1)-C(30)     | 108.31(10) |
| C(37)-B(1)-C(30)     | 110.35(11) |
| C(4)-S(1)-Fe(1)      | 109.68(4)  |
| C(4)-S(1)-Fe(1')     | 108.94(4)  |
| Fe(1)-S(1)-Fe(1')    | 98.137(15) |
| N(1)-Fe(1)-N(3)      | 176.07(4)  |
| N(1)-Fe(1)-N(4)      | 101.50(4)  |
| N(3)-Fe(1)-N(4)      | 81.02(4)   |
| N(1)-Fe(1)-N(2)      | 80.81(4)   |
| N(3)-Fe(1)-N(2)      | 101.70(4)  |
| N(4)-Fe(1)-N(2)      | 102.06(4)  |
| N(1)-Fe(1)-S(1)      | 84.58(3)   |
| N(3)-Fe(1)-S(1)      | 92.41(3)   |
| N(4)-Fe(1)-S(1)      | 167.98(3)  |
| N(2)-Fe(1)-S(1)      | 89.09(3)   |
| N(1)-Fe(1)-S(1')     | 92.30(3)   |
| N(3)-Fe(1)-S(1')     | 84.76(3)   |
| N(4)-Fe(1)-S(1')     | 87.49(3)   |
| N(2)-Fe(1)-S(1')     | 169.14(3)  |
| S(1)-Fe(1)-S(1')     | 81.863(15) |

---

Symmetry transformations used to generate equivalent atoms:

#1 -x,-y+2,-z+1 #2 -x,-y+2,-z

**Table S12.** Anisotropic displacement parameters ( $\text{\AA}^2 \times 10^3$ ) for  $[\text{Fe}^{\text{II}}(\text{tame}(\text{N}_2\text{S}(\text{quino})_2)]_2(\text{BPh}_4) \cdot 3\text{MeCN} \cdot \text{Et}_2\text{O}$  (**2**). The anisotropic displacement factor exponent takes the form:  $-2p^2[ h^2a^*2U^{11} + \dots + 2 h k a^* b^* U^{12} ]$

|       | U <sup>11</sup> | U <sup>22</sup> | U <sup>33</sup> | U <sup>23</sup> | U <sup>13</sup> | U <sup>12</sup> |
|-------|-----------------|-----------------|-----------------|-----------------|-----------------|-----------------|
| C(1)  | 18(1)           | 19(1)           | 18(1)           | -7(1)           | -7(1)           | 0(1)            |
| C(2)  | 17(1)           | 18(1)           | 18(1)           | -5(1)           | -7(1)           | -2(1)           |
| C(3)  | 24(1)           | 18(1)           | 28(1)           | -5(1)           | -11(1)          | -2(1)           |
| C(4)  | 17(1)           | 17(1)           | 23(1)           | -4(1)           | -7(1)           | -3(1)           |
| C(5)  | 15(1)           | 25(1)           | 17(1)           | -8(1)           | -4(1)           | -4(1)           |
| C(6)  | 14(1)           | 25(1)           | 19(1)           | -9(1)           | -6(1)           | -1(1)           |
| C(7)  | 18(1)           | 19(1)           | 17(1)           | -4(1)           | -8(1)           | -1(1)           |
| C(8)  | 14(1)           | 23(1)           | 16(1)           | -5(1)           | -7(1)           | 0(1)            |
| C(9)  | 15(1)           | 23(1)           | 15(1)           | -4(1)           | -7(1)           | -2(1)           |
| C(10) | 14(1)           | 26(1)           | 22(1)           | -5(1)           | -8(1)           | -3(1)           |
| C(11) | 19(1)           | 26(1)           | 23(1)           | -4(1)           | -10(1)          | -6(1)           |
| C(12) | 20(1)           | 24(1)           | 17(1)           | -5(1)           | -9(1)           | -4(1)           |
| C(13) | 25(1)           | 29(1)           | 27(1)           | -11(1)          | -12(1)          | -6(1)           |
| C(14) | 30(1)           | 34(1)           | 30(1)           | -18(1)          | -12(1)          | -1(1)           |
| C(15) | 21(1)           | 36(1)           | 22(1)           | -15(1)          | -8(1)           | 1(1)            |
| C(16) | 18(1)           | 30(1)           | 16(1)           | -8(1)           | -7(1)           | -3(1)           |
| C(17) | 18(1)           | 23(1)           | 13(1)           | -4(1)           | -7(1)           | -3(1)           |
| C(18) | 15(1)           | 32(1)           | 21(1)           | -9(1)           | -3(1)           | -5(1)           |
| C(19) | 19(1)           | 33(1)           | 19(1)           | -8(1)           | -1(1)           | -10(1)          |
| C(20) | 22(1)           | 27(1)           | 15(1)           | -6(1)           | -3(1)           | -8(1)           |
| C(21) | 30(1)           | 31(1)           | 16(1)           | -3(1)           | -4(1)           | -11(1)          |
| C(22) | 37(1)           | 30(1)           | 16(1)           | 0(1)            | -10(1)          | -7(1)           |
| C(23) | 27(1)           | 31(1)           | 18(1)           | -5(1)           | -10(1)          | -3(1)           |
| C(24) | 20(1)           | 27(1)           | 15(1)           | -6(1)           | -6(1)           | -4(1)           |
| C(25) | 20(1)           | 24(1)           | 13(1)           | -6(1)           | -4(1)           | -5(1)           |
| C(26) | 30(1)           | 43(1)           | 21(1)           | -5(1)           | -7(1)           | 13(1)           |
| C(27) | 21(1)           | 40(1)           | 22(1)           | 1(1)            | -8(1)           | 0(1)            |
| C(28) | 21(1)           | 30(1)           | 19(1)           | -1(1)           | -7(1)           | -3(1)           |
| C(29) | 20(1)           | 28(1)           | 16(1)           | -6(1)           | -4(1)           | -2(1)           |
| C(30) | 16(1)           | 31(1)           | 19(1)           | -6(1)           | -4(1)           | -8(1)           |

|        |       |       |       |        |        |        |
|--------|-------|-------|-------|--------|--------|--------|
| C(31)  | 39(1) | 29(1) | 23(1) | -7(1)  | -9(1)  | -11(1) |
| C(32)  | 50(1) | 41(1) | 22(1) | -9(1)  | -11(1) | -18(1) |
| C(33)  | 31(1) | 51(1) | 21(1) | -1(1)  | -12(1) | -17(1) |
| C(34)  | 19(1) | 44(1) | 22(1) | -10(1) | -7(1)  | 2(1)   |
| C(35)  | 22(1) | 50(1) | 26(1) | -5(1)  | -10(1) | 1(1)   |
| C(36)  | 42(1) | 36(1) | 31(1) | -16(1) | -13(1) | 11(1)  |
| C(37)  | 14(1) | 24(1) | 22(1) | -7(1)  | -7(1)  | -1(1)  |
| C(38)  | 18(1) | 26(1) | 23(1) | -8(1)  | -7(1)  | -2(1)  |
| C(39)  | 19(1) | 35(1) | 25(1) | -14(1) | -9(1)  | 0(1)   |
| C(40)  | 18(1) | 31(1) | 37(1) | -17(1) | -12(1) | 1(1)   |
| C(41)  | 17(1) | 25(1) | 36(1) | -8(1)  | -10(1) | -3(1)  |
| C(42)  | 16(1) | 27(1) | 23(1) | -7(1)  | -6(1)  | -1(1)  |
| C(43)  | 20(1) | 24(1) | 20(1) | -9(1)  | -4(1)  | -4(1)  |
| C(44)  | 22(1) | 32(1) | 21(1) | -9(1)  | -5(1)  | -7(1)  |
| C(45)  | 23(1) | 37(1) | 31(1) | -15(1) | -5(1)  | -10(1) |
| C(46)  | 29(1) | 26(1) | 30(1) | -13(1) | 1(1)   | -12(1) |
| C(47)  | 34(1) | 22(1) | 25(1) | -7(1)  | -5(1)  | -6(1)  |
| C(48)  | 25(1) | 24(1) | 25(1) | -7(1)  | -7(1)  | -3(1)  |
| B(2)   | 29(1) | 34(1) | 29(1) | -14(1) | -10(1) | 2(1)   |
| N(1)   | 15(1) | 20(1) | 14(1) | -7(1)  | -6(1)  | -2(1)  |
| N(2)   | 15(1) | 23(1) | 14(1) | -6(1)  | -4(1)  | -4(1)  |
| N(3)   | 15(1) | 20(1) | 13(1) | -4(1)  | -5(1)  | -2(1)  |
| N(4)   | 14(1) | 22(1) | 14(1) | -4(1)  | -6(1)  | -2(1)  |
| N(5)   | 48(2) | 70(2) | 68(2) | -48(2) | 16(1)  | -18(1) |
| C(49)  | 54(2) | 41(1) | 38(1) | -21(1) | 8(1)   | -13(1) |
| C(50)  | 46(2) | 74(2) | 66(2) | -33(2) | -1(2)  | -12(2) |
| N(5B)  | 54(2) | 41(1) | 38(1) | -21(1) | 8(1)   | -13(1) |
| C(49B) | 54(2) | 41(1) | 38(1) | -21(1) | 8(1)   | -13(1) |
| C(50B) | 54(2) | 41(1) | 38(1) | -21(1) | 8(1)   | -13(1) |
| N(5C)  | 54(2) | 41(1) | 38(1) | -21(1) | 8(1)   | -13(1) |
| C(49C) | 54(2) | 41(1) | 38(1) | -21(1) | 8(1)   | -13(1) |
| C(50C) | 54(2) | 41(1) | 38(1) | -21(1) | 8(1)   | -13(1) |
| N(7)   | 50(2) | 56(2) | 36(2) | -8(1)  | -19(1) | -5(2)  |
| C(53)  | 50(2) | 56(2) | 36(2) | -8(1)  | -19(1) | -5(2)  |
| C(54)  | 50(2) | 56(2) | 36(2) | -8(1)  | -19(1) | -5(2)  |
| C(55)  | 59(2) | 36(1) | 31(1) | -4(1)  | -23(1) | -7(1)  |



|       |       |       |       |        |        |       |
|-------|-------|-------|-------|--------|--------|-------|
| C(56) | 59(2) | 36(1) | 31(1) | -4(1)  | -23(1) | -7(1) |
| O(1)  | 59(2) | 36(1) | 31(1) | -4(1)  | -23(1) | -7(1) |
| C(57) | 59(2) | 36(1) | 31(1) | -4(1)  | -23(1) | -7(1) |
| C(58) | 59(2) | 36(1) | 31(1) | -4(1)  | -23(1) | -7(1) |
| N(6)  | 54(1) | 40(1) | 66(1) | -16(1) | -31(1) | 9(1)  |
| C(51) | 39(1) | 28(1) | 32(1) | -11(1) | -12(1) | -3(1) |
| C(52) | 31(1) | 44(1) | 46(1) | -20(1) | -12(1) | 1(1)  |
| B(1)  | 17(1) | 25(1) | 18(1) | -7(1)  | -5(1)  | -4(1) |
| S(1)  | 12(1) | 18(1) | 14(1) | -4(1)  | -4(1)  | -3(1) |
| Fe(1) | 11(1) | 19(1) | 12(1) | -4(1)  | -4(1)  | -2(1) |

---

**Table S13.** Hydrogen coordinates ( $\times 10^4$ ) and isotropic displacement parameters ( $\text{\AA}^2 \times 10^3$ ) for  $[\text{Fe}^{\text{II}}(\text{tame}-(\text{N}_2\text{S}(\text{quino})_2)]_2(\text{BPh}_4) \cdot 3\text{MeCN} \cdot \text{Et}_2\text{O}$  (**2**).

|       | x     | y     | z     | U(eq) |
|-------|-------|-------|-------|-------|
| H(1A) | 2139  | 7590  | 4282  | 22    |
| H(1B) | 1180  | 7486  | 3960  | 22    |
| H(3A) | 328   | 6039  | 6506  | 35    |
| H(3B) | 1522  | 6060  | 5628  | 35    |
| H(3C) | 492   | 6089  | 5341  | 35    |
| H(4A) | 761   | 12384 | 4756  | 23    |
| H(4B) | 965   | 12435 | 3584  | 23    |
| H(6)  | 2985  | 8929  | 3276  | 22    |
| H(7A) | -1824 | 12490 | 3943  | 22    |
| H(7B) | -640  | 12602 | 3063  | 22    |
| H(8)  | -2531 | 11185 | 4009  | 21    |
| H(10) | -3285 | 9672  | 3850  | 24    |
| H(11) | -2913 | 8145  | 3335  | 26    |
| H(13) | -1519 | 6902  | 2443  | 30    |
| H(14) | 280   | 6387  | 1624  | 34    |
| H(15) | 1664  | 7306  | 1469  | 30    |
| H(16) | 1254  | 8656  | 2237  | 25    |
| H(18) | 4009  | 10392 | 1725  | 27    |
| H(19) | 3939  | 11856 | 379   | 29    |
| H(21) | 2826  | 13105 | -588  | 32    |
| H(22) | 1163  | 13693 | -743  | 34    |
| H(23) | -400  | 12851 | 470   | 30    |
| H(24) | -319  | 11514 | 1903  | 25    |
| H(26) | 8277  | 3518  | 2064  | 42    |
| H(27) | 8189  | 5033  | 2524  | 37    |
| H(28) | 6634  | 6172  | 2757  | 30    |
| H(31) | 5274  | 5580  | 759   | 36    |
| H(32) | 4967  | 6341  | -783  | 43    |
| H(33) | 4007  | 7967  | -1048 | 41    |
| H(34) | 3595  | 8024  | 1843  | 35    |
| H(35) | 3322  | 8804  | 289   | 41    |

|        |       |       |       |    |
|--------|-------|-------|-------|----|
| H(36)  | 6728  | 3078  | 1985  | 44 |
| H(38)  | 3905  | 6256  | 4702  | 26 |
| H(39)  | 4039  | 7471  | 5450  | 30 |
| H(40)  | 4791  | 9049  | 4398  | 32 |
| H(41)  | 5515  | 9333  | 2581  | 30 |
| H(42)  | 5458  | 8077  | 1842  | 27 |
| H(44)  | 2571  | 6013  | 2578  | 30 |
| H(45)  | 1133  | 4986  | 3677  | 35 |
| H(46)  | 1205  | 3787  | 5216  | 35 |
| H(47)  | 2762  | 3591  | 5607  | 34 |
| H(48)  | 4225  | 4567  | 4476  | 30 |
| H(2)   | 5154  | 4191  | 2275  | 36 |
| H(50A) | 2801  | 5114  | 9     | 96 |
| H(50B) | 3022  | 4171  | 917   | 96 |
| H(50C) | 2686  | 5320  | 1070  | 96 |
| H(50D) | 3185  | 5184  | 655   | 73 |
| H(50E) | 2189  | 6026  | 584   | 73 |
| H(50F) | 2659  | 5281  | -179  | 73 |
| H(50G) | 1574  | 5512  | 179   | 73 |
| H(50H) | 2755  | 4944  | -273  | 73 |
| H(50I) | 2574  | 5784  | 349   | 73 |
| H(54A) | 1356  | 10072 | 361   | 71 |
| H(54B) | 889   | 10826 | -493  | 71 |
| H(54C) | 2165  | 10712 | -732  | 71 |
| H(55A) | -2685 | 10038 | 1037  | 61 |
| H(55B) | -1965 | 8951  | 1038  | 61 |
| H(55C) | -2008 | 9732  | -36   | 61 |
| H(56A) | -1101 | 10935 | 139   | 49 |
| H(56B) | -1042 | 10134 | 1204  | 49 |
| H(57A) | 951   | 10009 | 395   | 49 |
| H(57B) | 882   | 10806 | -669  | 49 |
| H(58A) | 2480  | 9719  | -1082 | 61 |
| H(58B) | 1678  | 9459  | -1518 | 61 |
| H(58C) | 1803  | 8712  | -464  | 61 |
| H(52A) | -2940 | 8174  | 6193  | 60 |
| H(52B) | -3436 | 7102  | 6443  | 60 |

H(52C)

-3592

7570

7374

60

---

**Table S14.** Crystal data and structure refinement for [Fe<sup>II</sup>(tame-(N<sub>2</sub>S(<sup>Me</sup>Im)<sub>2</sub>)<sub>2</sub>)]<sub>2</sub>(PF<sub>6</sub>)<sub>2</sub>•2MeCN (**3**).

|                                   |                                             |                  |
|-----------------------------------|---------------------------------------------|------------------|
| Identification code               | bkl_7_97_0ma                                |                  |
| Empirical formula                 | C70 H99 F24 Fe4 N29 P4 S4                   |                  |
| Formula weight                    | 2278.30                                     |                  |
| Temperature                       | 100(2) K                                    |                  |
| Wavelength                        | 0.71073 Å                                   |                  |
| Crystal system                    | Triclinic                                   |                  |
| Space group                       | P -1                                        |                  |
| Unit cell dimensions              | a = 13.9227(10) Å                           | α = 97.318(6)°.  |
|                                   | b = 14.5427(19) Å                           | β = 116.683(4)°. |
|                                   | c = 15.0078(11) Å                           | γ = 112.025(6)°. |
| Volume                            | 2351.0(4) Å <sup>3</sup>                    |                  |
| Z                                 | 1                                           |                  |
| Density (calculated)              | 1.609 mg/m <sup>3</sup>                     |                  |
| Absorption coefficient            | 0.868 mm <sup>-1</sup>                      |                  |
| F(000)                            | 1166                                        |                  |
| Crystal size                      | 0.10 x 0.05 x 0.05 mm <sup>3</sup>          |                  |
| Theta range for data collection   | 2.10 to 30.73°.                             |                  |
| Index ranges                      | -19<=h<=19, -20<=k<=20, -21<=l<=20          |                  |
| Reflections collected             | 50076                                       |                  |
| Independent reflections           | 14435 [R(int) = 0.0608]                     |                  |
| Completeness to theta = 25.00°    | 99.9 %                                      |                  |
| Max. and min. transmission        | 0.9579 and 0.9182                           |                  |
| Refinement method                 | Full-matrix least-squares on F <sup>2</sup> |                  |
| Data / restraints / parameters    | 14435 / 12 / 661                            |                  |
| Goodness-of-fit on F <sup>2</sup> | 1.016                                       |                  |
| Final R indices [I>2sigma(I)]     | R1 = 0.0501, wR2 = 0.1081                   |                  |
| R indices (all data)              | R1 = 0.0976, wR2 = 0.1270                   |                  |
| Largest diff. peak and hole       | 1.293 and -0.870 e.Å <sup>-3</sup>          |                  |

**Table S15.** Atomic coordinates ( $\times 10^4$ ) and equivalent isotropic displacement parameters ( $\text{\AA}^2 \times 10^3$ ) for  $[\text{Fe}^{\text{II}}(\text{tame}-(\text{N}_2\text{S}^{\text{Me}}\text{Im})_2)]_2(\text{PF}_6)_2 \bullet 2\text{MeCN}$  (**3**).  $U(\text{eq})$  is defined as one third of the trace of the orthogonalized  $U^{\text{ij}}$  tensor.

|       | x        | y       | z       | U(eq) |
|-------|----------|---------|---------|-------|
| C(1)  | 4358(3)  | 4921(2) | 2548(2) | 28(1) |
| C(2)  | 3539(3)  | 4860(2) | 2984(2) | 21(1) |
| C(3)  | 3620(3)  | 4122(2) | 3626(2) | 19(1) |
| C(4)  | 2220(3)  | 4400(2) | 2036(2) | 22(1) |
| C(5)  | 4017(3)  | 6006(2) | 3677(2) | 22(1) |
| C(6)  | 4146(3)  | 6617(2) | 5310(2) | 21(1) |
| C(7)  | 3507(3)  | 6376(2) | 5845(2) | 21(1) |
| C(8)  | 1955(3)  | 5440(2) | 5944(2) | 25(1) |
| C(9)  | 2890(3)  | 6133(2) | 6946(2) | 27(1) |
| C(10) | 5072(3)  | 7557(3) | 7781(2) | 32(1) |
| C(11) | 638(3)   | 4834(2) | 1687(2) | 22(1) |
| C(12) | 173(3)   | 5302(2) | 2171(2) | 22(1) |
| C(13) | 216(3)   | 6084(2) | 3531(2) | 25(1) |
| C(14) | -666(3)  | 6102(2) | 2646(3) | 29(1) |
| C(15) | -1470(3) | 5448(3) | 665(2)  | 35(1) |
| C(16) | -2756(3) | 1403(2) | 444(2)  | 27(1) |
| C(17) | -1527(2) | 1798(2) | 1495(2) | 20(1) |
| C(18) | -1253(2) | 2817(2) | 2249(2) | 22(1) |
| C(19) | -527(2)  | 2021(2) | 1238(2) | 19(1) |
| C(20) | -1658(2) | 914(2)  | 1968(2) | 21(1) |
| C(21) | -829(2)  | 1044(2) | 3781(2) | 18(1) |
| C(22) | 252(2)   | 1569(2) | 4828(2) | 17(1) |
| C(23) | 2183(3)  | 2673(2) | 6002(2) | 20(1) |
| C(24) | 1691(3)  | 2171(2) | 6523(2) | 22(1) |
| C(25) | -442(3)  | 786(2)  | 5958(2) | 26(1) |
| C(26) | 925(2)   | 1410(2) | 1754(2) | 18(1) |
| C(27) | 1762(2)  | 1232(2) | 2610(2) | 16(1) |
| C(28) | 2718(2)  | 1297(2) | 4241(2) | 18(1) |
| C(29) | 3013(2)  | 754(2)  | 3688(2) | 20(1) |
| C(30) | 2315(3)  | 90(2)   | 1743(2) | 27(1) |
| N(1)  | 1466(2)  | 4645(2) | 2357(2) | 19(1) |
| N(2)  | 3457(2)  | 6036(2) | 4303(2) | 20(1) |
| N(3)  | 2351(2)  | 5592(2) | 5262(2) | 20(1) |
| N(5)  | 3875(2)  | 6721(2) | 6887(2) | 24(1) |
| N(4)  | 742(2)   | 5577(2) | 3233(2) | 20(1) |
| N(6)  | -699(2)  | 5601(2) | 1783(2) | 27(1) |
| N(7)  | 514(2)   | 1969(2) | 2063(2) | 16(1) |
| N(8)  | -612(2)  | 1276(2) | 3063(2) | 17(1) |

|        |          |          |          |        |
|--------|----------|----------|----------|--------|
| N(9)   | 1282(2)  | 2293(2)  | 4935(2)  | 16(1)  |
| N(11)  | 472(2)   | 1476(2)  | 5775(2)  | 20(1)  |
| N(10)  | 1928(2)  | 1589(2)  | 3560(2)  | 15(1)  |
| N(12)  | 2412(2)  | 714(2)   | 2654(2)  | 19(1)  |
| N(13)  | 3680(7)  | 6615(7)  | -513(6)  | 62(1)  |
| C(31)  | 4403(9)  | 7155(8)  | 371(6)   | 62(1)  |
| C(32)  | 5201(8)  | 7863(7)  | 1460(6)  | 62(1)  |
| N(13B) | 3968(7)  | 6531(6)  | -415(6)  | 62(1)  |
| C(31B) | 4623(9)  | 7309(7)  | 320(7)   | 62(1)  |
| C(32B) | 5553(8)  | 8264(6)  | 1229(7)  | 62(1)  |
| N(14)  | 8308(4)  | 3098(3)  | 8961(3)  | 64(1)  |
| C(33)  | 7944(3)  | 2648(3)  | 8091(3)  | 39(1)  |
| C(34)  | 7519(4)  | 2106(3)  | 7015(3)  | 46(1)  |
| N(15)  | 5984(11) | 5741(9)  | 1429(10) | 114(3) |
| C(35)  | 5302(18) | 5359(14) | 532(14)  | 114(3) |
| C(36)  | 4590(17) | 4904(14) | -606(13) | 114(3) |
| F(1)   | 3659(2)  | 9167(2)  | 7127(2)  | 53(1)  |
| F(2)   | 5315(2)  | 10510(2) | 7351(2)  | 48(1)  |
| F(3)   | 4387(2)  | 10074(2) | 5582(2)  | 63(1)  |
| F(4)   | 2719(2)  | 8720(2)  | 5344(2)  | 60(1)  |
| F(5)   | 4598(2)  | 8853(2)  | 6311(2)  | 40(1)  |
| F(6)   | 3431(2)  | 10371(2) | 6378(2)  | 33(1)  |
| F(7)   | 2769(4)  | 3069(3)  | 10131(4) | 46(1)  |
| F(8)   | 476(4)   | 784(3)   | 8532(4)  | 48(1)  |
| F(9)   | 1146(5)  | 2427(4)  | 8460(3)  | 38(1)  |
| F(10)  | 2102(5)  | 1414(4)  | 10209(4) | 52(2)  |
| F(11)  | 851(5)   | 2158(4)  | 9779(4)  | 40(1)  |
| F(12)  | 2392(5)  | 1702(4)  | 8890(4)  | 44(1)  |
| F(13)  | 477(5)   | 2012(4)  | 8641(4)  | 57(1)  |
| F(14)  | 2719(4)  | 1581(3)  | 9918(3)  | 50(1)  |
| F(15)  | 1988(5)  | 2592(3)  | 10373(3) | 54(1)  |
| F(16)  | 1239(5)  | 1029(4)  | 8219(3)  | 52(1)  |
| F(17)  | 2442(5)  | 2768(3)  | 9125(4)  | 61(1)  |
| F(18)  | 765(4)   | 838(3)   | 9462(3)  | 47(1)  |
| P(1)   | 4009(1)  | 9605(1)  | 6340(1)  | 25(1)  |
| P(2)   | 1615(1)  | 1863(1)  | 9320(1)  | 30(1)  |
| S(1)   | 2776(1)  | 3961(1)  | 4294(1)  | 17(1)  |
| S(2)   | 200(1)   | 3454(1)  | 3546(1)  | 18(1)  |
| Fe(1)  | 1818(1)  | 4950(1)  | 3783(1)  | 17(1)  |
| Fe(2)  | 1018(1)  | 2357(1)  | 3545(1)  | 14(1)  |

---

**Table S16.** Bond lengths [Å] and angles [°] for [Fe<sup>II</sup>(tame-(N<sub>2</sub>S(<sup>Me</sup>Im)<sub>2</sub>)]<sub>2</sub>(PF<sub>6</sub>)<sub>2</sub>•2MeCN (**3**)

---

|             |          |
|-------------|----------|
| Fe(1)-N(1)  | 1.917(2) |
| Fe(1)-N(2)  | 1.923(2) |
| Fe(1)-N(3)  | 1.955(2) |
| Fe(1)-N(4)  | 1.966(2) |
| Fe(2)-N(7)  | 1.933(2) |
| Fe(2)-N(8)  | 1.925(2) |
| Fe(2)-N(9)  | 1.970(2) |
| Fe(2)-N(10) | 1.973(2) |
| C(1)-C(2)   | 1.532(4) |
| C(1)-H(1A)  | 0.9800   |
| C(1)-H(1B)  | 0.9800   |
| C(1)-H(1C)  | 0.9800   |
| C(2)-C(4)   | 1.528(4) |
| C(2)-C(3)   | 1.533(4) |
| C(2)-C(5)   | 1.552(4) |
| C(3)-S(1)   | 1.831(3) |
| C(3)-H(3A)  | 0.9900   |
| C(3)-H(3B)  | 0.9900   |
| C(4)-N(1)   | 1.467(4) |
| C(4)-H(4A)  | 0.9900   |
| C(4)-H(4B)  | 0.9900   |
| C(5)-N(2)   | 1.471(3) |
| C(5)-H(5A)  | 0.9900   |
| C(5)-H(5B)  | 0.9900   |
| C(6)-N(2)   | 1.297(3) |
| C(6)-C(7)   | 1.427(4) |
| C(6)-H(6)   | 0.9500   |
| C(7)-N(3)   | 1.327(4) |
| C(7)-N(5)   | 1.359(4) |
| C(8)-C(9)   | 1.358(4) |
| C(8)-N(3)   | 1.367(4) |
| C(8)-H(8)   | 0.9500   |
| C(9)-N(5)   | 1.368(4) |



|              |          |
|--------------|----------|
| C(9)-H(9)    | 0.9500   |
| C(10)-N(5)   | 1.454(4) |
| C(10)-H(10A) | 0.9800   |
| C(10)-H(10B) | 0.9800   |
| C(10)-H(10C) | 0.9800   |
| C(11)-N(1)   | 1.297(4) |
| C(11)-C(12)  | 1.427(4) |
| C(11)-H(11)  | 0.9500   |
| C(12)-N(4)   | 1.339(4) |
| C(12)-N(6)   | 1.353(4) |
| C(13)-C(14)  | 1.356(4) |
| C(13)-N(4)   | 1.377(4) |
| C(13)-H(13)  | 0.9500   |
| C(14)-N(6)   | 1.375(4) |
| C(14)-H(14)  | 0.9500   |
| C(15)-N(6)   | 1.457(4) |
| C(15)-H(15A) | 0.9800   |
| C(15)-H(15B) | 0.9800   |
| C(15)-H(15C) | 0.9800   |
| C(16)-C(17)  | 1.534(4) |
| C(16)-H(16A) | 0.9800   |
| C(16)-H(16B) | 0.9800   |
| C(16)-H(16C) | 0.9800   |
| C(17)-C(19)  | 1.537(4) |
| C(17)-C(20)  | 1.538(4) |
| C(17)-C(18)  | 1.545(4) |
| C(18)-S(2)   | 1.826(3) |
| C(18)-H(18A) | 0.9900   |
| C(18)-H(18B) | 0.9900   |
| C(19)-N(7)   | 1.461(3) |
| C(19)-H(19A) | 0.9900   |
| C(19)-H(19B) | 0.9900   |
| C(20)-N(8)   | 1.467(3) |
| C(20)-H(20A) | 0.9900   |
| C(20)-H(20B) | 0.9900   |
| C(21)-N(8)   | 1.294(3) |

|               |          |
|---------------|----------|
| C(21)-C(22)   | 1.423(4) |
| C(21)-H(21)   | 0.9500   |
| C(22)-N(9)    | 1.345(3) |
| C(22)-N(11)   | 1.350(3) |
| C(23)-C(24)   | 1.365(4) |
| C(23)-N(9)    | 1.376(3) |
| C(23)-H(23)   | 0.9500   |
| C(24)-N(11)   | 1.369(4) |
| C(24)-H(24)   | 0.9500   |
| C(25)-N(11)   | 1.458(3) |
| C(25)-H(25A)  | 0.9800   |
| C(25)-H(25B)  | 0.9800   |
| C(25)-H(25C)  | 0.9800   |
| C(26)-N(7)    | 1.301(3) |
| C(26)-C(27)   | 1.430(4) |
| C(26)-H(26)   | 0.9500   |
| C(27)-N(10)   | 1.334(3) |
| C(27)-N(12)   | 1.364(3) |
| C(28)-C(29)   | 1.366(4) |
| C(28)-N(10)   | 1.374(3) |
| C(28)-H(28)   | 0.9500   |
| C(29)-N(12)   | 1.374(3) |
| C(29)-H(29)   | 0.9500   |
| C(30)-N(12)   | 1.461(3) |
| C(30)-H(30A)  | 0.9800   |
| C(30)-H(30B)  | 0.9800   |
| C(30)-H(30C)  | 0.9800   |
| N(13)-C(31)   | 1.155(4) |
| C(31)-C(32)   | 1.431(4) |
| C(32)-H(32A)  | 0.9800   |
| C(32)-H(32B)  | 0.9800   |
| C(32)-H(32C)  | 0.9800   |
| N(13B)-C(31B) | 1.155(4) |
| C(31B)-C(32B) | 1.431(4) |
| C(32B)-H(32D) | 0.9800   |
| C(32B)-H(32E) | 0.9800   |

|               |            |
|---------------|------------|
| C(32B)-H(32F) | 0.9800     |
| N(14)-C(33)   | 1.154(4)   |
| C(33)-C(34)   | 1.431(4)   |
| C(34)-H(34A)  | 0.9800     |
| C(34)-H(34B)  | 0.9800     |
| C(34)-H(34C)  | 0.9800     |
| N(15)-C(35)   | 1.134(15)  |
| N(15)-C(36)#1 | 1.14(2)    |
| C(35)-C(36)#1 | 0.47(3)    |
| C(35)-C(36)   | 1.428(12)  |
| C(35)-C(35)#1 | 1.44(4)    |
| C(36)-C(35)#1 | 0.47(3)    |
| C(36)-N(15)#1 | 1.14(2)    |
| C(36)-C(36)#1 | 1.57(3)    |
| C(36)-H(36A)  | 0.9600     |
| C(36)-H(36B)  | 0.9600     |
| C(36)-H(36C)  | 0.9600     |
| F(1)-P(1)     | 1.586(2)   |
| F(2)-P(1)     | 1.600(2)   |
| F(3)-P(1)     | 1.581(2)   |
| F(4)-P(1)     | 1.575(2)   |
| F(5)-P(1)     | 1.601(2)   |
| F(6)-P(1)     | 1.6093(19) |
| F(7)-P(2)     | 1.651(4)   |
| F(8)-P(2)     | 1.534(4)   |
| F(9)-P(2)     | 1.637(4)   |
| F(10)-P(2)    | 1.551(4)   |
| F(11)-P(2)    | 1.648(4)   |
| F(12)-P(2)    | 1.555(4)   |
| F(13)-P(2)    | 1.569(4)   |
| F(14)-P(2)    | 1.632(4)   |
| F(15)-P(2)    | 1.522(4)   |
| F(16)-P(2)    | 1.647(4)   |
| F(17)-P(2)    | 1.552(4)   |
| F(18)-P(2)    | 1.627(4)   |
| S(1)-Fe(1)    | 2.2883(8)  |

|                  |            |
|------------------|------------|
| S(1)-Fe(2)       | 2.2965(8)  |
| S(2)-Fe(2)       | 2.2825(8)  |
| S(2)-Fe(1)       | 2.3109(8)  |
|                  |            |
| C(2)-C(1)-H(1A)  | 109.5      |
| C(2)-C(1)-H(1B)  | 109.5      |
| H(1A)-C(1)-H(1B) | 109.5      |
| C(2)-C(1)-H(1C)  | 109.5      |
| H(1A)-C(1)-H(1C) | 109.5      |
| H(1B)-C(1)-H(1C) | 109.5      |
| C(4)-C(2)-C(1)   | 108.0(2)   |
| C(4)-C(2)-C(3)   | 110.4(2)   |
| C(1)-C(2)-C(3)   | 107.4(2)   |
| C(4)-C(2)-C(5)   | 110.5(2)   |
| C(1)-C(2)-C(5)   | 107.6(2)   |
| C(3)-C(2)-C(5)   | 112.7(2)   |
| C(2)-C(3)-S(1)   | 116.35(19) |
| C(2)-C(3)-H(3A)  | 108.2      |
| S(1)-C(3)-H(3A)  | 108.2      |
| C(2)-C(3)-H(3B)  | 108.2      |
| S(1)-C(3)-H(3B)  | 108.2      |
| H(3A)-C(3)-H(3B) | 107.4      |
| N(1)-C(4)-C(2)   | 111.4(2)   |
| N(1)-C(4)-H(4A)  | 109.4      |
| C(2)-C(4)-H(4A)  | 109.4      |
| N(1)-C(4)-H(4B)  | 109.4      |
| C(2)-C(4)-H(4B)  | 109.4      |
| H(4A)-C(4)-H(4B) | 108.0      |
| N(2)-C(5)-C(2)   | 112.8(2)   |
| N(2)-C(5)-H(5A)  | 109.0      |
| C(2)-C(5)-H(5A)  | 109.0      |
| N(2)-C(5)-H(5B)  | 109.0      |
| C(2)-C(5)-H(5B)  | 109.0      |
| H(5A)-C(5)-H(5B) | 107.8      |
| N(2)-C(6)-C(7)   | 112.6(3)   |
| N(2)-C(6)-H(6)   | 123.7      |

|                     |          |
|---------------------|----------|
| C(7)-C(6)-H(6)      | 123.7    |
| N(3)-C(7)-N(4)      | 110.3(2) |
| N(3)-C(7)-C(6)      | 116.5(2) |
| N(4)-C(7)-C(6)      | 132.8(3) |
| C(9)-C(8)-N(3)      | 108.9(3) |
| C(9)-C(8)-H(8)      | 125.6    |
| N(3)-C(8)-H(8)      | 125.6    |
| C(8)-C(9)-N(4)      | 107.2(3) |
| C(8)-C(9)-H(9)      | 126.4    |
| N(5)-C(9)-H(9)      | 126.4    |
| N(5)-C(10)-H(10A)   | 109.5    |
| N(5)-C(10)-H(10B)   | 109.5    |
| H(10A)-C(10)-H(10B) | 109.5    |
| N(5)-C(10)-H(10C)   | 109.5    |
| H(10A)-C(10)-H(10C) | 109.5    |
| H(10B)-C(10)-H(10C) | 109.5    |
| N(1)-C(11)-C(12)    | 112.5(2) |
| N(1)-C(11)-H(11)    | 123.8    |
| C(12)-C(11)-H(11)   | 123.8    |
| N(4)-C(12)-N(6)     | 110.8(2) |
| N(4)-C(12)-C(11)    | 116.2(3) |
| N(6)-C(12)-C(11)    | 132.8(3) |
| C(14)-C(13)-N(4)    | 108.8(3) |
| C(14)-C(13)-H(13)   | 125.6    |
| N(4)-C(13)-H(13)    | 125.6    |
| C(13)-C(14)-N(6)    | 107.6(3) |
| C(13)-C(14)-H(14)   | 126.2    |
| N(6)-C(14)-H(14)    | 126.2    |
| N(6)-C(15)-H(15A)   | 109.5    |
| N(6)-C(15)-H(15B)   | 109.5    |
| H(15A)-C(15)-H(15B) | 109.5    |
| N(6)-C(15)-H(15C)   | 109.5    |
| H(15A)-C(15)-H(15C) | 109.5    |
| H(15B)-C(15)-H(15C) | 109.5    |
| C(17)-C(16)-H(16A)  | 109.5    |
| C(17)-C(16)-H(16B)  | 109.5    |

|                     |            |
|---------------------|------------|
| H(16A)-C(16)-H(16B) | 109.5      |
| C(17)-C(16)-H(16C)  | 109.5      |
| H(16A)-C(16)-H(16C) | 109.5      |
| H(16B)-C(16)-H(16C) | 109.5      |
| C(16)-C(17)-C(19)   | 108.0(2)   |
| C(16)-C(17)-C(20)   | 107.8(2)   |
| C(19)-C(17)-C(20)   | 110.3(2)   |
| C(16)-C(17)-C(18)   | 108.1(2)   |
| C(19)-C(17)-C(18)   | 111.2(2)   |
| C(20)-C(17)-C(18)   | 111.3(2)   |
| C(17)-C(18)-S(2)    | 115.81(19) |
| C(17)-C(18)-H(18A)  | 108.3      |
| S(2)-C(18)-H(18A)   | 108.3      |
| C(17)-C(18)-H(18B)  | 108.3      |
| S(2)-C(18)-H(18B)   | 108.3      |
| H(18A)-C(18)-H(18B) | 107.4      |
| N(7)-C(19)-C(17)    | 110.9(2)   |
| N(7)-C(19)-H(19A)   | 109.5      |
| C(17)-C(19)-H(19A)  | 109.5      |
| N(7)-C(19)-H(19B)   | 109.5      |
| C(17)-C(19)-H(19B)  | 109.5      |
| H(19A)-C(19)-H(19B) | 108.0      |
| N(8)-C(20)-C(17)    | 112.2(2)   |
| N(8)-C(20)-H(20A)   | 109.2      |
| C(17)-C(20)-H(20A)  | 109.2      |
| N(8)-C(20)-H(20B)   | 109.2      |
| C(17)-C(20)-H(20B)  | 109.2      |
| H(20A)-C(20)-H(20B) | 107.9      |
| N(8)-C(21)-C(22)    | 112.5(2)   |
| N(8)-C(21)-H(21)    | 123.7      |
| C(22)-C(21)-H(21)   | 123.7      |
| N(9)-C(22)-N(10)    | 110.9(2)   |
| N(9)-C(22)-C(21)    | 116.8(2)   |
| N(11)-C(22)-C(21)   | 132.3(2)   |
| C(24)-C(23)-N(9)    | 109.3(2)   |
| C(24)-C(23)-H(23)   | 125.4      |

|                     |            |
|---------------------|------------|
| N(9)-C(23)-H(23)    | 125.4      |
| C(23)-C(24)-N(11)   | 107.0(2)   |
| C(23)-C(24)-H(24)   | 126.5      |
| N(11)-C(24)-H(24)   | 126.5      |
| N(11)-C(25)-H(25A)  | 109.5      |
| N(11)-C(25)-H(25B)  | 109.5      |
| H(25A)-C(25)-H(25B) | 109.5      |
| N(11)-C(25)-H(25C)  | 109.5      |
| H(25A)-C(25)-H(25C) | 109.5      |
| H(25B)-C(25)-H(25C) | 109.5      |
| N(7)-C(26)-C(27)    | 112.8(2)   |
| N(7)-C(26)-H(26)    | 123.6      |
| C(27)-C(26)-H(26)   | 123.6      |
| N(10)-C(27)-N(12)   | 111.0(2)   |
| N(10)-C(27)-C(26)   | 116.2(2)   |
| N(12)-C(27)-C(26)   | 132.6(2)   |
| C(29)-C(28)-N(10)   | 108.9(2)   |
| C(29)-C(28)-H(28)   | 125.5      |
| N(10)-C(28)-H(28)   | 125.5      |
| C(28)-C(29)-N(12)   | 107.5(2)   |
| C(28)-C(29)-H(29)   | 126.3      |
| N(12)-C(29)-H(29)   | 126.3      |
| N(12)-C(30)-H(30A)  | 109.5      |
| N(12)-C(30)-H(30B)  | 109.5      |
| H(30A)-C(30)-H(30B) | 109.5      |
| N(12)-C(30)-H(30C)  | 109.5      |
| H(30A)-C(30)-H(30C) | 109.5      |
| H(30B)-C(30)-H(30C) | 109.5      |
| C(11)-N(1)-C(4)     | 117.9(2)   |
| C(11)-N(1)-Fe(1)    | 117.39(19) |
| C(4)-N(1)-Fe(1)     | 123.77(18) |
| C(6)-N(2)-C(5)      | 120.0(2)   |
| C(6)-N(2)-Fe(1)     | 117.13(19) |
| C(5)-N(2)-Fe(1)     | 120.51(17) |
| C(7)-N(3)-C(8)      | 106.8(2)   |
| C(7)-N(3)-Fe(1)     | 112.57(18) |

|                       |            |
|-----------------------|------------|
| C(8)-N(3)-Fe(1)       | 140.3(2)   |
| C(7)-N(5)-C(9)        | 106.8(2)   |
| C(7)-N(5)-C(10)       | 127.7(3)   |
| C(9)-N(5)-C(10)       | 125.4(3)   |
| C(12)-N(4)-C(13)      | 106.1(2)   |
| C(12)-N(4)-Fe(1)      | 111.38(18) |
| C(13)-N(4)-Fe(1)      | 141.6(2)   |
| C(12)-N(6)-C(14)      | 106.6(2)   |
| C(12)-N(6)-C(15)      | 125.3(3)   |
| C(14)-N(6)-C(15)      | 128.1(3)   |
| C(26)-N(7)-C(19)      | 117.6(2)   |
| C(26)-N(7)-Fe(2)      | 117.41(18) |
| C(19)-N(7)-Fe(2)      | 122.94(17) |
| C(21)-N(8)-C(20)      | 118.8(2)   |
| C(21)-N(8)-Fe(2)      | 117.63(18) |
| C(20)-N(8)-Fe(2)      | 121.84(17) |
| C(22)-N(9)-C(23)      | 105.6(2)   |
| C(22)-N(9)-Fe(2)      | 111.63(17) |
| C(23)-N(9)-Fe(2)      | 142.50(19) |
| C(22)-N(11)-C(24)     | 107.2(2)   |
| C(22)-N(11)-C(25)     | 125.7(2)   |
| C(24)-N(11)-C(25)     | 127.1(2)   |
| C(27)-N(10)-C(28)     | 106.3(2)   |
| C(27)-N(10)-Fe(2)     | 112.76(17) |
| C(28)-N(10)-Fe(2)     | 140.96(18) |
| C(27)-N(12)-C(29)     | 106.3(2)   |
| C(27)-N(12)-C(30)     | 126.2(2)   |
| C(29)-N(12)-C(30)     | 126.8(2)   |
| N(13)-C(31)-C(32)     | 173.5(11)  |
| N(13B)-C(31B)-C(32B)  | 173.1(11)  |
| N(14)-C(33)-C(34)     | 178.7(4)   |
| C(35)-N(15)-C(36)#1   | 23.8(16)   |
| C(36)#1-C(35)-N(15)   | 79(4)      |
| C(36)#1-C(35)-C(36)   | 99(4)      |
| N(15)-C(35)-C(36)     | 172.0(17)  |
| C(36)#1-C(35)-C(35)#1 | 80(4)      |



|                       |            |
|-----------------------|------------|
| N(15)-C(35)-C(35)#1   | 157(3)     |
| C(36)-C(35)-C(35)#1   | 18.8(13)   |
| C(35)#1-C(36)-N(15)#1 | 77(4)      |
| C(35)#1-C(36)-C(35)   | 81(4)      |
| N(15)#1-C(36)-C(35)   | 157.6(16)  |
| C(35)#1-C(36)-C(36)#1 | 64(4)      |
| N(15)#1-C(36)-C(36)#1 | 141(2)     |
| C(35)-C(36)-C(36)#1   | 17.2(12)   |
| C(35)#1-C(36)-H(36A)  | 71.5       |
| N(15)#1-C(36)-H(36A)  | 71.1       |
| C(35)-C(36)-H(36A)    | 109.2      |
| C(36)#1-C(36)-H(36A)  | 101.8      |
| C(35)#1-C(36)-H(36B)  | 167.5      |
| N(15)#1-C(36)-H(36B)  | 90.9       |
| C(35)-C(36)-H(36B)    | 109.3      |
| C(36)#1-C(36)-H(36B)  | 126.3      |
| H(36A)-C(36)-H(36B)   | 109.5      |
| C(35)#1-C(36)-H(36C)  | 59.6       |
| N(15)#1-C(36)-H(36C)  | 52.1       |
| C(35)-C(36)-H(36C)    | 109.9      |
| C(36)#1-C(36)-H(36C)  | 99.1       |
| H(36A)-C(36)-H(36C)   | 109.5      |
| H(36B)-C(36)-H(36C)   | 109.5      |
| F(4)-P(1)-F(3)        | 90.72(15)  |
| F(4)-P(1)-F(1)        | 90.82(15)  |
| F(3)-P(1)-F(1)        | 178.35(17) |
| F(4)-P(1)-F(2)        | 179.60(13) |
| F(3)-P(1)-F(2)        | 89.27(14)  |
| F(1)-P(1)-F(2)        | 89.18(14)  |
| F(4)-P(1)-F(5)        | 90.92(12)  |
| F(3)-P(1)-F(5)        | 89.60(12)  |
| F(1)-P(1)-F(5)        | 90.95(11)  |
| F(2)-P(1)-F(5)        | 89.48(11)  |
| F(4)-P(1)-F(6)        | 89.66(11)  |
| F(3)-P(1)-F(6)        | 90.31(12)  |
| F(1)-P(1)-F(6)        | 89.13(11)  |

|                  |            |
|------------------|------------|
| F(2)-P(1)-F(6)   | 89.94(11)  |
| F(5)-P(1)-F(6)   | 179.42(13) |
| F(15)-P(2)-F(8)  | 131.4(3)   |
| F(15)-P(2)-F(10) | 70.6(3)    |
| F(8)-P(2)-F(10)  | 93.4(3)    |
| F(15)-P(2)-F(17) | 93.9(2)    |
| F(8)-P(2)-F(17)  | 130.4(3)   |
| F(10)-P(2)-F(17) | 124.7(3)   |
| F(15)-P(2)-F(12) | 131.7(3)   |
| F(8)-P(2)-F(12)  | 93.3(3)    |
| F(10)-P(2)-F(12) | 92.8(3)    |
| F(17)-P(2)-F(12) | 58.2(2)    |
| F(15)-P(2)-F(13) | 93.8(3)    |
| F(8)-P(2)-F(13)  | 69.6(2)    |
| F(10)-P(2)-F(13) | 140.6(3)   |
| F(17)-P(2)-F(13) | 91.3(3)    |
| F(12)-P(2)-F(13) | 122.4(3)   |
| F(15)-P(2)-F(18) | 90.8(2)    |
| F(8)-P(2)-F(18)  | 46.4(2)    |
| F(10)-P(2)-F(18) | 54.7(2)    |
| F(17)-P(2)-F(18) | 174.6(2)   |
| F(12)-P(2)-F(18) | 116.5(2)   |
| F(13)-P(2)-F(18) | 91.0(3)    |
| F(15)-P(2)-F(14) | 92.1(3)    |
| F(8)-P(2)-F(14)  | 104.4(2)   |
| F(10)-P(2)-F(14) | 40.1(2)    |
| F(17)-P(2)-F(14) | 90.9(3)    |
| F(12)-P(2)-F(14) | 54.3(2)    |
| F(13)-P(2)-F(14) | 173.5(2)   |
| F(18)-P(2)-F(14) | 86.3(2)    |
| F(15)-P(2)-F(9)  | 104.8(2)   |
| F(8)-P(2)-F(9)   | 90.5(3)    |
| F(10)-P(2)-F(9)  | 175.3(3)   |
| F(17)-P(2)-F(9)  | 53.7(2)    |
| F(12)-P(2)-F(9)  | 89.7(2)    |
| F(13)-P(2)-F(9)  | 39.1(2)    |

|                  |           |
|------------------|-----------|
| F(18)-P(2)-F(9)  | 127.3(3)  |
| F(14)-P(2)-F(9)  | 141.1(3)  |
| F(15)-P(2)-F(16) | 176.5(2)  |
| F(8)-P(2)-F(16)  | 48.0(2)   |
| F(10)-P(2)-F(16) | 106.0(3)  |
| F(17)-P(2)-F(16) | 88.1(3)   |
| F(12)-P(2)-F(16) | 47.5(2)   |
| F(13)-P(2)-F(16) | 89.0(2)   |
| F(18)-P(2)-F(16) | 87.1(2)   |
| F(14)-P(2)-F(16) | 85.0(2)   |
| F(9)-P(2)-F(16)  | 78.7(2)   |
| F(15)-P(2)-F(11) | 45.9(2)   |
| F(8)-P(2)-F(11)  | 91.0(3)   |
| F(10)-P(2)-F(11) | 90.9(3)   |
| F(17)-P(2)-F(11) | 115.9(2)  |
| F(12)-P(2)-F(11) | 174.2(2)  |
| F(13)-P(2)-F(11) | 55.7(2)   |
| F(18)-P(2)-F(11) | 69.3(2)   |
| F(14)-P(2)-F(11) | 128.2(2)  |
| F(9)-P(2)-F(11)  | 86.3(2)   |
| F(16)-P(2)-F(11) | 135.4(3)  |
| F(15)-P(2)-F(7)  | 47.5(2)   |
| F(8)-P(2)-F(7)   | 175.3(3)  |
| F(10)-P(2)-F(7)  | 90.3(3)   |
| F(17)-P(2)-F(7)  | 48.6(2)   |
| F(12)-P(2)-F(7)  | 89.4(3)   |
| F(13)-P(2)-F(7)  | 105.7(2)  |
| F(18)-P(2)-F(7)  | 135.1(2)  |
| F(14)-P(2)-F(7)  | 80.3(2)   |
| F(9)-P(2)-F(7)   | 85.7(2)   |
| F(16)-P(2)-F(7)  | 133.5(3)  |
| F(11)-P(2)-F(7)  | 86.0(3)   |
| C(3)-S(1)-Fe(1)  | 103.34(9) |
| C(3)-S(1)-Fe(2)  | 115.74(9) |
| Fe(1)-S(1)-Fe(2) | 96.70(3)  |
| C(18)-S(2)-Fe(2) | 104.45(9) |

|                  |            |
|------------------|------------|
| C(18)-S(2)-Fe(1) | 117.64(10) |
| Fe(2)-S(2)-Fe(1) | 96.46(3)   |
| N(1)-Fe(1)-N(2)  | 89.65(10)  |
| N(1)-Fe(1)-N(3)  | 167.11(10) |
| N(2)-Fe(1)-N(3)  | 81.01(10)  |
| N(1)-Fe(1)-N(4)  | 80.89(10)  |
| N(2)-Fe(1)-N(4)  | 106.40(10) |
| N(3)-Fe(1)-N(4)  | 93.19(10)  |
| N(1)-Fe(1)-S(1)  | 97.84(7)   |
| N(2)-Fe(1)-S(1)  | 82.89(7)   |
| N(3)-Fe(1)-S(1)  | 89.84(7)   |
| N(4)-Fe(1)-S(1)  | 170.58(7)  |
| N(1)-Fe(1)-S(2)  | 100.43(7)  |
| N(2)-Fe(1)-S(2)  | 161.71(7)  |
| N(3)-Fe(1)-S(2)  | 90.99(7)   |
| N(4)-Fe(1)-S(2)  | 90.36(7)   |
| S(1)-Fe(1)-S(2)  | 80.65(3)   |
| N(8)-Fe(2)-N(7)  | 86.88(9)   |
| N(8)-Fe(2)-N(9)  | 80.99(9)   |
| N(7)-Fe(2)-N(9)  | 163.06(9)  |
| N(8)-Fe(2)-N(10) | 105.35(9)  |
| N(7)-Fe(2)-N(10) | 80.60(9)   |
| N(9)-Fe(2)-N(10) | 91.20(9)   |
| N(8)-Fe(2)-S(2)  | 82.90(7)   |
| N(7)-Fe(2)-S(2)  | 97.94(7)   |
| N(9)-Fe(2)-S(2)  | 92.29(7)   |
| N(10)-Fe(2)-S(2) | 171.47(7)  |
| N(8)-Fe(2)-S(1)  | 162.91(7)  |
| N(7)-Fe(2)-S(1)  | 101.19(7)  |
| N(9)-Fe(2)-S(1)  | 93.70(7)   |
| N(10)-Fe(2)-S(1) | 90.92(7)   |
| S(2)-Fe(2)-S(1)  | 81.09(3)   |

---

Symmetry transformations used to generate equivalent atoms:

#1 -x+1,-y+1,-z

**Table S17.** Anisotropic displacement parameters ( $\text{\AA}^2 \times 10^3$ ) for  $[\text{Fe}^{\text{II}}(\text{tame-}(\text{N}_2\text{S}(\text{MeIm})_2)_2)(\text{PF}_6)_2 \bullet 2\text{MeCN} (\mathbf{3})$ . The anisotropic displacement factor exponent takes the form:  $-2p^2 [ h^2 a^{*2} U^{11} + \dots + 2 h k a^* b^* U^{12} ]$

|       | U <sup>11</sup> | U <sup>22</sup> | U <sup>33</sup> | U <sup>23</sup> | U <sup>13</sup> | U <sup>12</sup> |
|-------|-----------------|-----------------|-----------------|-----------------|-----------------|-----------------|
| C(1)  | 25(2)           | 26(2)           | 28(2)           | 4(1)            | 19(1)           | 4(1)            |
| C(2)  | 21(1)           | 18(1)           | 20(1)           | 2(1)            | 13(1)           | 5(1)            |
| C(3)  | 18(1)           | 17(1)           | 20(1)           | 2(1)            | 12(1)           | 5(1)            |
| C(4)  | 24(2)           | 22(1)           | 18(1)           | 4(1)            | 13(1)           | 7(1)            |
| C(5)  | 23(2)           | 17(1)           | 22(1)           | 3(1)            | 15(1)           | 4(1)            |
| C(6)  | 20(1)           | 14(1)           | 22(1)           | 2(1)            | 12(1)           | 4(1)            |
| C(7)  | 26(2)           | 17(1)           | 19(1)           | 3(1)            | 12(1)           | 10(1)           |
| C(8)  | 27(2)           | 27(2)           | 26(2)           | 8(1)            | 19(1)           | 12(1)           |
| C(9)  | 34(2)           | 32(2)           | 24(2)           | 9(1)            | 20(1)           | 18(2)           |
| C(10) | 33(2)           | 32(2)           | 18(1)           | -1(1)           | 10(1)           | 14(2)           |
| C(11) | 26(2)           | 17(1)           | 18(1)           | 4(1)            | 11(1)           | 9(1)            |
| C(12) | 24(2)           | 17(1)           | 21(1)           | 6(1)            | 11(1)           | 9(1)            |
| C(13) | 29(2)           | 21(1)           | 27(2)           | 6(1)            | 18(1)           | 12(1)           |
| C(14) | 30(2)           | 27(2)           | 33(2)           | 9(1)            | 17(2)           | 17(1)           |
| C(15) | 38(2)           | 37(2)           | 26(2)           | 9(1)            | 10(2)           | 24(2)           |
| C(16) | 18(1)           | 29(2)           | 23(2)           | 6(1)            | 5(1)            | 9(1)            |
| C(17) | 14(1)           | 20(1)           | 20(1)           | 6(1)            | 7(1)            | 7(1)            |
| C(18) | 15(1)           | 23(1)           | 21(1)           | 4(1)            | 7(1)            | 9(1)            |
| C(19) | 16(1)           | 18(1)           | 15(1)           | 4(1)            | 5(1)            | 8(1)            |
| C(20) | 14(1)           | 19(1)           | 19(1)           | 3(1)            | 6(1)            | 3(1)            |
| C(21) | 15(1)           | 17(1)           | 20(1)           | 5(1)            | 10(1)           | 6(1)            |
| C(22) | 17(1)           | 16(1)           | 20(1)           | 6(1)            | 13(1)           | 8(1)            |
| C(23) | 15(1)           | 20(1)           | 17(1)           | 3(1)            | 8(1)            | 4(1)            |
| C(24) | 21(1)           | 24(1)           | 17(1)           | 5(1)            | 10(1)           | 9(1)            |
| C(25) | 25(2)           | 26(2)           | 29(2)           | 13(1)           | 19(1)           | 9(1)            |
| C(26) | 17(1)           | 17(1)           | 15(1)           | 4(1)            | 8(1)            | 5(1)            |
| C(27) | 14(1)           | 15(1)           | 18(1)           | 3(1)            | 9(1)            | 6(1)            |
| C(28) | 15(1)           | 18(1)           | 18(1)           | 6(1)            | 8(1)            | 5(1)            |
| C(29) | 16(1)           | 18(1)           | 20(1)           | 4(1)            | 8(1)            | 7(1)            |
| C(30) | 26(2)           | 29(2)           | 25(2)           | 1(1)            | 14(1)           | 15(1)           |

|       |       |        |       |        |       |       |
|-------|-------|--------|-------|--------|-------|-------|
| N(1)  | 20(1) | 15(1)  | 18(1) | 2(1)   | 11(1) | 5(1)  |
| N(2)  | 23(1) | 13(1)  | 19(1) | 2(1)   | 13(1) | 4(1)  |
| N(3)  | 22(1) | 17(1)  | 20(1) | 4(1)   | 12(1) | 8(1)  |
| N(5)  | 27(1) | 22(1)  | 19(1) | 2(1)   | 12(1) | 11(1) |
| N(4)  | 21(1) | 16(1)  | 22(1) | 5(1)   | 13(1) | 7(1)  |
| N(6)  | 30(1) | 25(1)  | 26(1) | 9(1)   | 12(1) | 16(1) |
| N(7)  | 14(1) | 15(1)  | 16(1) | 4(1)   | 7(1)  | 5(1)  |
| N(8)  | 15(1) | 14(1)  | 17(1) | 4(1)   | 7(1)  | 6(1)  |
| N(9)  | 14(1) | 14(1)  | 16(1) | 3(1)   | 9(1)  | 5(1)  |
| N(11) | 19(1) | 21(1)  | 21(1) | 7(1)   | 13(1) | 7(1)  |
| N(10) | 14(1) | 14(1)  | 16(1) | 4(1)   | 9(1)  | 4(1)  |
| N(12) | 18(1) | 19(1)  | 18(1) | 4(1)   | 10(1) | 9(1)  |
| N(14) | 91(3) | 32(2)  | 56(2) | 12(2)  | 48(2) | 9(2)  |
| C(33) | 46(2) | 21(2)  | 50(2) | 12(2)  | 32(2) | 10(2) |
| C(34) | 61(3) | 25(2)  | 48(2) | 7(2)   | 37(2) | 10(2) |
| F(1)  | 65(2) | 77(2)  | 73(2) | 54(1)  | 58(1) | 52(1) |
| F(2)  | 23(1) | 49(1)  | 48(1) | 1(1)   | 7(1)  | 15(1) |
| F(3)  | 73(2) | 112(2) | 65(2) | 65(2)  | 57(2) | 64(2) |
| F(4)  | 29(1) | 53(1)  | 55(1) | -16(1) | 3(1)  | 16(1) |
| F(5)  | 35(1) | 43(1)  | 50(1) | 12(1)  | 24(1) | 25(1) |
| F(6)  | 26(1) | 35(1)  | 40(1) | 13(1)  | 16(1) | 18(1) |
| F(7)  | 34(3) | 30(2)  | 34(3) | -2(2)  | 6(2)  | 0(2)  |
| F(8)  | 42(3) | 20(2)  | 56(3) | 6(2)   | 18(3) | 4(2)  |
| F(9)  | 58(3) | 40(3)  | 30(2) | 21(2)  | 28(2) | 29(3) |
| F(10) | 60(4) | 71(4)  | 50(3) | 46(3)  | 32(3) | 43(3) |
| F(11) | 47(3) | 48(3)  | 45(3) | 21(2)  | 34(3) | 29(3) |
| F(12) | 60(3) | 45(3)  | 62(3) | 29(3)  | 50(3) | 33(3) |
| F(13) | 67(3) | 51(3)  | 58(3) | 18(2)  | 28(3) | 42(3) |
| F(14) | 47(3) | 51(3)  | 29(2) | 5(2)   | 6(2)  | 24(2) |
| F(15) | 75(4) | 29(2)  | 43(2) | -7(2)  | 38(3) | 9(2)  |
| F(16) | 85(4) | 56(3)  | 25(2) | 16(2)  | 23(2) | 50(3) |
| F(17) | 79(4) | 45(3)  | 81(4) | 30(3)  | 61(3) | 27(3) |
| F(18) | 51(3) | 21(2)  | 37(2) | 3(2)   | 18(2) | -2(2) |
| P(1)  | 20(1) | 32(1)  | 24(1) | 9(1)   | 13(1) | 13(1) |
| P(2)  | 37(1) | 26(1)  | 25(1) | 9(1)   | 17(1) | 13(1) |
| S(1)  | 14(1) | 15(1)  | 16(1) | 2(1)   | 8(1)  | 4(1)  |

|       |       |       |       |      |       |      |
|-------|-------|-------|-------|------|-------|------|
| S(2)  | 17(1) | 16(1) | 20(1) | 4(1) | 11(1) | 7(1) |
| Fe(1) | 18(1) | 14(1) | 17(1) | 3(1) | 10(1) | 5(1) |
| Fe(2) | 12(1) | 13(1) | 14(1) | 3(1) | 7(1)  | 4(1) |

---

**Table S18.** Hydrogen coordinates (  $\times 10^4$ ) and isotropic displacement parameters ( $\text{\AA}^2 \times 10^3$ ) for  $[\text{Fe}^{\text{II}}(\text{tame}-(\text{N}_2\text{S}^{\text{Me}}\text{Im})_2)]_2(\text{PF}_6)_2 \bullet 2\text{MeCN}$  (**3**).

|        | x     | y    | z    | U(eq) |
|--------|-------|------|------|-------|
| H(1A)  | 3996  | 4231 | 2010 | 42    |
| H(1B)  | 5180  | 5105 | 3133 | 42    |
| H(1C)  | 4423  | 5465 | 2221 | 42    |
| H(3A)  | 4499  | 4395 | 4174 | 23    |
| H(3B)  | 3313  | 3412 | 3137 | 23    |
| H(4A)  | 2231  | 4697 | 1480 | 26    |
| H(4B)  | 1849  | 3620 | 1724 | 26    |
| H(5A)  | 4922  | 6352 | 4171 | 27    |
| H(5B)  | 3838  | 6418 | 3207 | 27    |
| H(6)   | 4983  | 7144 | 5654 | 25    |
| H(8)   | 1157  | 4933 | 5748 | 30    |
| H(9)   | 2864  | 6197 | 7572 | 33    |
| H(10A) | 5699  | 7647 | 7614 | 47    |
| H(10B) | 5275  | 7364 | 8419 | 47    |
| H(10C) | 5048  | 8224 | 7913 | 47    |
| H(11)  | 372   | 4679 | 955  | 26    |
| H(13)  | 435   | 6374 | 4241 | 30    |
| H(14)  | -1169 | 6405 | 2627 | 35    |
| H(15A) | -989  | 5976 | 475  | 52    |
| H(15B) | -2178 | 5532 | 554  | 52    |
| H(15C) | -1762 | 4733 | 215  | 52    |
| H(16A) | -3005 | 705  | -9   | 40    |
| H(16B) | -2661 | 1907 | 74   | 40    |
| H(16C) | -3387 | 1344 | 597  | 40    |
| H(18A) | -1932 | 2641 | 2371 | 26    |
| H(18B) | -1255 | 3337 | 1883 | 26    |
| H(19A) | -880  | 1492 | 540  | 22    |
| H(19B) | -239  | 2734 | 1186 | 22    |
| H(20A) | -2427 | 660  | 1965 | 25    |
| H(20B) | -1725 | 308  | 1513 | 25    |



|        |       |      |      |     |
|--------|-------|------|------|-----|
| H(21)  | -1622 | 574  | 3626 | 22  |
| H(23)  | 3016  | 3201 | 6325 | 24  |
| H(24)  | 2114  | 2282 | 7263 | 27  |
| H(25A) | -746  | 1194 | 6216 | 39  |
| H(25B) | -64   | 501  | 6493 | 39  |
| H(25C) | -1130 | 198  | 5288 | 39  |
| H(26)  | 692   | 1148 | 1035 | 21  |
| H(28)  | 3011  | 1449 | 4978 | 22  |
| H(29)  | 3537  | 457  | 3967 | 24  |
| H(30A) | 1564  | -601 | 1381 | 40  |
| H(30B) | 3034  | -17  | 1994 | 40  |
| H(30C) | 2282  | 469  | 1244 | 40  |
| H(32A) | 4934  | 7534 | 1896 | 93  |
| H(32B) | 5168  | 8528 | 1510 | 93  |
| H(32C) | 6046  | 8012 | 1720 | 93  |
| H(32D) | 6357  | 8448 | 1329 | 93  |
| H(32E) | 5570  | 8155 | 1866 | 93  |
| H(32F) | 5369  | 8842 | 1114 | 93  |
| H(34A) | 7570  | 2611 | 6641 | 69  |
| H(34B) | 6662  | 1542 | 6650 | 69  |
| H(34C) | 8033  | 1795 | 7016 | 69  |
| H(36A) | 5120  | 4908 | -852 | 172 |
| H(36B) | 4211  | 5315 | -894 | 172 |
| H(36C) | 3964  | 4186 | -839 | 172 |

---

**Table S19.** Crystal data and structure refinement for [Co<sup>II</sup>(tame-(N<sub>2</sub>S<sup>(Me)Im)<sub>2</sub>)]<sub>2</sub>(PF<sub>6</sub>)<sub>2</sub>•2MeCN (**4**).</sup>

|                                   |                                                                                                               |                  |
|-----------------------------------|---------------------------------------------------------------------------------------------------------------|------------------|
| Identification code               | bk17_139_0m                                                                                                   |                  |
| Empirical formula                 | C <sub>36</sub> H <sub>51</sub> Co <sub>2</sub> F <sub>12</sub> N <sub>15</sub> P <sub>2</sub> S <sub>2</sub> |                  |
| Formula weight                    | 1165.84                                                                                                       |                  |
| Temperature                       | 100(2) K                                                                                                      |                  |
| Wavelength                        | 0.71073 Å                                                                                                     |                  |
| Crystal system                    | Triclinic                                                                                                     |                  |
| Space group                       | P -1                                                                                                          |                  |
| Unit cell dimensions              | a = 10.9597(3) Å                                                                                              | α = 93.948(2)°.  |
|                                   | b = 13.0171(4) Å                                                                                              | β = 102.099(2)°. |
|                                   | c = 17.9975(5) Å                                                                                              | γ = 95.177(2)°.  |
| Volume                            | 2490.14(12) Å <sup>3</sup>                                                                                    |                  |
| Z                                 | 2                                                                                                             |                  |
| Density (calculated)              | 1.555 mg/m <sup>3</sup>                                                                                       |                  |
| Absorption coefficient            | 0.905 mm <sup>-1</sup>                                                                                        |                  |
| F(000)                            | 1192                                                                                                          |                  |
| Crystal size                      | 0.15 x 0.05 x 0.05 mm <sup>3</sup>                                                                            |                  |
| Theta range for data collection   | 2.01 to 30.68°.                                                                                               |                  |
| Index ranges                      | -15 ≤ h ≤ 15, -18 ≤ k ≤ 18, -25 ≤ l ≤ 25                                                                      |                  |
| Reflections collected             | 107396                                                                                                        |                  |
| Independent reflections           | 15125 [R(int) = 0.0643]                                                                                       |                  |
| Completeness to theta = 25.00°    | 99.9 %                                                                                                        |                  |
| Max. and min. transmission        | 0.9562 and 0.8763                                                                                             |                  |
| Refinement method                 | Full-matrix least-squares on F <sup>2</sup>                                                                   |                  |
| Data / restraints / parameters    | 15125 / 0 / 631                                                                                               |                  |
| Goodness-of-fit on F <sup>2</sup> | 1.014                                                                                                         |                  |
| Final R indices [I > 2σ(I)]       | R1 = 0.0374, wR2 = 0.0752                                                                                     |                  |
| R indices (all data)              | R1 = 0.0657, wR2 = 0.0863                                                                                     |                  |
| Largest diff. peak and hole       | 0.673 and -0.507 e.Å <sup>-3</sup>                                                                            |                  |

**Table S20.** Atomic coordinates ( $\times 10^4$ ) and equivalent isotropic displacement parameters ( $\text{\AA}^2 \times 10^3$ ) for  $[\text{Co}^{\text{II}}(\text{tame}-(\text{N}_2\text{S}^{\text{Me}}\text{Im})_2)]_2(\text{PF}_6)_2 \bullet 2\text{MeCN}$  (**4**).  $U(\text{eq})$  is defined as one third of the trace of the orthogonalized  $U^{\text{ij}}$  tensor.

|       | x        | y       | z       | U(eq) |
|-------|----------|---------|---------|-------|
| C(1)  | 2063(2)  | 1473(2) | 4155(1) | 19(1) |
| C(2)  | 2886(2)  | 641(1)  | 3953(1) | 18(1) |
| C(3)  | 2431(2)  | -367(2) | 4260(1) | 24(1) |
| C(4)  | 4275(2)  | 917(2)  | 4352(1) | 20(1) |
| C(5)  | 5479(2)  | 2538(2) | 4765(1) | 18(1) |
| C(6)  | 5804(2)  | 3585(1) | 4595(1) | 17(1) |
| C(7)  | 5706(2)  | 4937(1) | 3963(1) | 18(1) |
| C(8)  | 6460(2)  | 5236(2) | 4669(1) | 20(1) |
| C(9)  | 7209(2)  | 4316(2) | 5844(1) | 25(1) |
| C(10) | 2728(2)  | 413(2)  | 3088(1) | 19(1) |
| C(11) | 4217(2)  | 780(1)  | 2344(1) | 18(1) |
| C(12) | 5094(2)  | 1544(2) | 2128(1) | 18(1) |
| C(13) | 6135(2)  | 3025(2) | 2142(1) | 22(1) |
| C(14) | 6453(2)  | 2377(2) | 1598(1) | 24(1) |
| C(15) | 5758(2)  | 512(2)  | 1086(1) | 30(1) |
| C(16) | 2962(2)  | 3894(2) | 1392(1) | 20(1) |
| C(17) | 1952(2)  | 3162(2) | 828(1)  | 19(1) |
| C(18) | 2308(2)  | 3140(2) | 46(1)   | 27(1) |
| C(19) | 1919(2)  | 2038(2) | 1048(1) | 19(1) |
| C(20) | 374(2)   | 1017(1) | 1490(1) | 18(1) |
| C(21) | -416(2)  | 930(2)  | 2036(1) | 19(1) |
| C(22) | -1239(2) | 1403(2) | 2970(1) | 24(1) |
| C(23) | -1742(2) | 408(2)  | 2720(1) | 26(1) |
| C(24) | -1446(2) | -897(2) | 1675(1) | 34(1) |
| C(25) | 651(2)   | 3556(2) | 725(1)  | 20(1) |
| C(26) | -416(2)  | 4453(2) | 1538(1) | 20(1) |
| C(27) | -691(2)  | 4589(2) | 2291(1) | 20(1) |
| C(28) | -591(2)  | 4346(2) | 3470(1) | 26(1) |
| C(29) | -1383(2) | 5085(2) | 3292(1) | 29(1) |
| C(30) | -2183(2) | 5954(2) | 2099(1) | 37(1) |

|       |          |         |         |       |
|-------|----------|---------|---------|-------|
| C(31) | 2225(2)  | 6592(2) | 2146(2) | 40(1) |
| C(32) | 1318(2)  | 7101(2) | 2462(1) | 37(1) |
| C(33) | 9447(2)  | 7876(3) | 4293(2) | 53(1) |
| C(34) | 10537(2) | 7580(2) | 4800(2) | 38(1) |
| C(35) | 5267(2)  | 3519(2) | -889(1) | 36(1) |
| C(36) | 6010(2)  | 3969(2) | -158(1) | 35(1) |
| N(1)  | 4761(1)  | 1957(1) | 4218(1) | 17(1) |
| N(2)  | 5297(1)  | 3907(1) | 3924(1) | 17(1) |
| N(3)  | 6517(1)  | 4374(1) | 5063(1) | 19(1) |
| N(4)  | 3545(1)  | 1140(1) | 2778(1) | 17(1) |
| N(5)  | 5284(1)  | 2501(1) | 2473(1) | 18(1) |
| N(6)  | 5787(2)  | 1440(1) | 1596(1) | 21(1) |
| N(7)  | 1152(1)  | 1839(1) | 1604(1) | 17(1) |
| N(8)  | -413(1)  | 1724(1) | 2542(1) | 19(1) |
| N(9)  | -1220(2) | 115(1)  | 2121(1) | 23(1) |
| N(10) | 253(1)   | 3726(1) | 1441(1) | 18(1) |
| N(11) | -160(2)  | 4037(1) | 2841(1) | 20(1) |
| N(12) | -1443(2) | 5233(1) | 2541(1) | 25(1) |
| N(13) | 598(3)   | 7495(2) | 2713(2) | 65(1) |
| N(14) | 11403(3) | 7360(2) | 5195(1) | 54(1) |
| N(15) | 6587(3)  | 4336(2) | 413(1)  | 53(1) |
| F(1)  | 3773(2)  | 853(1)  | 6365(1) | 48(1) |
| F(2)  | 4680(2)  | 1473(1) | 7581(1) | 51(1) |
| F(3)  | 4651(1)  | 3109(1) | 7240(1) | 30(1) |
| F(4)  | 2859(1)  | 2018(1) | 6999(1) | 37(1) |
| F(5)  | 5567(1)  | 1939(1) | 6606(1) | 37(1) |
| F(6)  | 3741(1)  | 2496(1) | 6029(1) | 34(1) |
| F(7)  | 1810(2)  | 7550(1) | 625(1)  | 61(1) |
| F(8)  | 3527(1)  | 8588(1) | 533(1)  | 52(1) |
| F(9)  | 2348(2)  | 9880(1) | 262(1)  | 61(1) |
| F(10) | 2287(2)  | 9111(2) | 1327(1) | 84(1) |
| F(11) | 1823(1)  | 8345(1) | -430(1) | 36(1) |
| F(12) | 614(1)   | 8858(1) | 356(1)  | 47(1) |
| P(1)  | 4211(1)  | 1980(1) | 6802(1) | 24(1) |
| P(2)  | 2070(1)  | 8724(1) | 453(1)  | 29(1) |
| S(1)  | 2206(1)  | 2724(1) | 3756(1) | 16(1) |

|       |         |         |         |       |
|-------|---------|---------|---------|-------|
| S(2)  | 2909(1) | 3943(1) | 2402(1) | 17(1) |
| Co(1) | 4029(1) | 2730(1) | 3220(1) | 15(1) |
| Co(2) | 990(1)  | 2967(1) | 2477(1) | 15(1) |

---

**Table S21.** Bond lengths [Å] and angles [°] for [Co<sup>II</sup>(tame-(N<sub>2</sub>S<sup>Me</sup>Im)<sub>2</sub>)]<sub>2</sub>(PF<sub>6</sub>)<sub>2</sub>•2MeCN (**4**).

---

|              |            |
|--------------|------------|
| C(1)-C(2)    | 1.543(3)   |
| C(1)-S(1)    | 1.8308(19) |
| C(1)-H(1A)   | 0.9900     |
| C(1)-H(1B)   | 0.9900     |
| C(2)-C(10)   | 1.535(3)   |
| C(2)-C(4)    | 1.539(3)   |
| C(2)-C(3)    | 1.539(3)   |
| C(3)-H(3A)   | 0.9800     |
| C(3)-H(3B)   | 0.9800     |
| C(3)-H(3C)   | 0.9800     |
| C(4)-N(1)    | 1.464(2)   |
| C(4)-H(4A)   | 0.9900     |
| C(4)-H(4B)   | 0.9900     |
| C(5)-N(1)    | 1.275(2)   |
| C(5)-C(6)    | 1.447(3)   |
| C(5)-H(5)    | 0.9500     |
| C(6)-N(4)    | 1.332(2)   |
| C(6)-N(5)    | 1.354(2)   |
| C(7)-N(4)    | 1.366(2)   |
| C(7)-C(8)    | 1.372(3)   |
| C(7)-H(7)    | 0.9500     |
| C(8)-N(5)    | 1.368(3)   |
| C(8)-H(8)    | 0.9500     |
| C(9)-N(5)    | 1.460(2)   |
| C(9)-H(9A)   | 0.9800     |
| C(9)-H(9B)   | 0.9800     |
| C(9)-H(9C)   | 0.9800     |
| C(10)-N(2)   | 1.462(2)   |
| C(10)-H(10A) | 0.9900     |
| C(10)-H(10B) | 0.9900     |
| C(11)-N(2)   | 1.274(2)   |
| C(11)-C(12)  | 1.449(3)   |
| C(11)-H(11)  | 0.9500     |
| C(12)-N(3)   | 1.331(2)   |

|              |            |
|--------------|------------|
| C(12)-N(6)   | 1.349(2)   |
| C(13)-N(3)   | 1.365(2)   |
| C(13)-C(14)  | 1.369(3)   |
| C(13)-H(13)  | 0.9500     |
| C(14)-N(6)   | 1.363(3)   |
| C(14)-H(14)  | 0.9500     |
| C(15)-N(6)   | 1.461(3)   |
| C(15)-H(15A) | 0.9800     |
| C(15)-H(15B) | 0.9800     |
| C(15)-H(15C) | 0.9800     |
| C(16)-C(17)  | 1.540(3)   |
| C(16)-S(2)   | 1.8268(19) |
| C(16)-H(16A) | 0.9900     |
| C(16)-H(16B) | 0.9900     |
| C(17)-C(18)  | 1.536(3)   |
| C(17)-C(25)  | 1.538(3)   |
| C(17)-C(19)  | 1.541(3)   |
| C(18)-H(18A) | 0.9800     |
| C(18)-H(18B) | 0.9800     |
| C(18)-H(18C) | 0.9800     |
| C(19)-N(7)   | 1.458(2)   |
| C(19)-H(19A) | 0.9900     |
| C(19)-H(19B) | 0.9900     |
| C(20)-N(7)   | 1.283(2)   |
| C(20)-C(21)  | 1.442(3)   |
| C(20)-H(20)  | 0.9500     |
| C(21)-N(10)  | 1.329(2)   |
| C(21)-N(9)   | 1.355(2)   |
| C(22)-N(10)  | 1.361(2)   |
| C(22)-C(23)  | 1.367(3)   |
| C(22)-H(22)  | 0.9500     |
| C(23)-N(11)  | 1.370(3)   |
| C(23)-H(23)  | 0.9500     |
| C(24)-N(11)  | 1.467(3)   |
| C(24)-H(24A) | 0.9800     |
| C(24)-H(24B) | 0.9800     |

|              |            |
|--------------|------------|
| C(24)-H(24C) | 0.9800     |
| C(25)-N(8)   | 1.455(2)   |
| C(25)-H(25A) | 0.9900     |
| C(25)-H(25B) | 0.9900     |
| C(26)-N(8)   | 1.272(2)   |
| C(26)-C(27)  | 1.451(3)   |
| C(26)-H(26)  | 0.9500     |
| C(27)-N(9)   | 1.329(3)   |
| C(27)-N(12)  | 1.347(2)   |
| C(28)-C(29)  | 1.362(3)   |
| C(28)-N(9)   | 1.364(2)   |
| C(28)-H(28)  | 0.9500     |
| C(29)-N(12)  | 1.369(3)   |
| C(29)-H(29)  | 0.9500     |
| C(30)-N(12)  | 1.463(3)   |
| C(30)-H(30A) | 0.9800     |
| C(30)-H(30B) | 0.9800     |
| C(30)-H(30C) | 0.9800     |
| C(31)-C(32)  | 1.435(4)   |
| C(31)-H(31A) | 0.9800     |
| C(31)-H(31B) | 0.9800     |
| C(31)-H(31C) | 0.9800     |
| C(32)-N(13)  | 1.131(3)   |
| C(33)-C(34)  | 1.443(4)   |
| C(33)-H(33A) | 0.9800     |
| C(33)-H(33B) | 0.9800     |
| C(33)-H(33C) | 0.9800     |
| C(34)-N(14)  | 1.132(3)   |
| C(35)-C(36)  | 1.448(3)   |
| C(35)-H(35A) | 0.9800     |
| C(35)-H(35B) | 0.9800     |
| C(35)-H(35C) | 0.9800     |
| C(36)-N(15)  | 1.135(3)   |
| N(1)-Co(1)   | 2.1620(16) |
| N(4)-Co(1)   | 2.1205(15) |
| N(2)-Co(1)   | 2.1446(15) |



|             |            |
|-------------|------------|
| N(3)-Co(1)  | 2.1410(16) |
| N(7)-Co(2)  | 2.1225(16) |
| N(10)-Co(2) | 2.1556(15) |
| N(8)-Co(2)  | 2.2078(16) |
| N(9)-Co(2)  | 2.1205(16) |
| F(1)-P(1)   | 1.5993(14) |
| F(2)-P(1)   | 1.5981(15) |
| F(3)-P(1)   | 1.6018(13) |
| F(4)-P(1)   | 1.5983(14) |
| F(5)-P(1)   | 1.6022(14) |
| F(6)-P(1)   | 1.5947(14) |
| F(7)-P(2)   | 1.5928(17) |
| F(8)-P(2)   | 1.5992(15) |
| F(9)-P(2)   | 1.5844(17) |
| F(10)-P(2)  | 1.5802(17) |
| F(11)-P(2)  | 1.5911(14) |
| F(12)-P(2)  | 1.5960(15) |
| S(1)-Co(1)  | 2.3930(5)  |
| S(1)-Co(2)  | 2.4616(5)  |
| S(2)-Co(2)  | 2.3912(5)  |
| S(2)-Co(1)  | 2.4653(5)  |

|                  |            |
|------------------|------------|
| C(2)-C(1)-S(1)   | 118.39(13) |
| C(2)-C(1)-H(1A)  | 107.7      |
| S(1)-C(1)-H(1A)  | 107.7      |
| C(2)-C(1)-H(1B)  | 107.7      |
| S(1)-C(1)-H(1B)  | 107.7      |
| H(1A)-C(1)-H(1B) | 107.1      |
| C(10)-C(2)-C(4)  | 111.47(15) |
| C(10)-C(2)-C(3)  | 106.98(15) |
| C(4)-C(2)-C(3)   | 106.85(15) |
| C(10)-C(2)-C(1)  | 112.24(15) |
| C(4)-C(2)-C(1)   | 111.92(15) |
| C(3)-C(2)-C(1)   | 107.01(15) |
| C(2)-C(3)-H(3A)  | 109.5      |
| C(2)-C(3)-H(3B)  | 109.5      |

|                     |            |
|---------------------|------------|
| H(3A)-C(3)-H(3B)    | 109.5      |
| C(2)-C(3)-H(3C)     | 109.5      |
| H(3A)-C(3)-H(3C)    | 109.5      |
| H(3B)-C(3)-H(3C)    | 109.5      |
| N(1)-C(4)-C(2)      | 112.33(15) |
| N(1)-C(4)-H(4A)     | 109.1      |
| C(2)-C(4)-H(4A)     | 109.1      |
| N(1)-C(4)-H(4B)     | 109.1      |
| C(2)-C(4)-H(4B)     | 109.1      |
| H(4A)-C(4)-H(4B)    | 107.9      |
| N(1)-C(5)-C(6)      | 115.32(17) |
| N(1)-C(5)-H(5)      | 122.3      |
| C(6)-C(5)-H(5)      | 122.3      |
| N(4)-C(6)-N(5)      | 110.88(17) |
| N(4)-C(6)-C(5)      | 120.40(16) |
| N(5)-C(6)-C(5)      | 128.49(17) |
| N(4)-C(7)-C(8)      | 109.13(17) |
| N(4)-C(7)-H(7)      | 125.4      |
| C(8)-C(7)-H(7)      | 125.4      |
| N(5)-C(8)-C(7)      | 106.68(16) |
| N(5)-C(8)-H(8)      | 126.7      |
| C(7)-C(8)-H(8)      | 126.7      |
| N(5)-C(9)-H(9A)     | 109.5      |
| N(5)-C(9)-H(9B)     | 109.5      |
| H(9A)-C(9)-H(9B)    | 109.5      |
| N(5)-C(9)-H(9C)     | 109.5      |
| H(9A)-C(9)-H(9C)    | 109.5      |
| H(9B)-C(9)-H(9C)    | 109.5      |
| N(2)-C(10)-C(2)     | 111.79(14) |
| N(2)-C(10)-H(10A)   | 109.3      |
| C(2)-C(10)-H(10A)   | 109.3      |
| N(2)-C(10)-H(10B)   | 109.3      |
| C(2)-C(10)-H(10B)   | 109.3      |
| H(10A)-C(10)-H(10B) | 107.9      |
| N(2)-C(11)-C(12)    | 114.91(17) |
| N(2)-C(11)-H(11)    | 122.5      |

|                     |            |
|---------------------|------------|
| C(12)-C(11)-H(11)   | 122.5      |
| N(3)-C(12)-N(6)     | 111.44(16) |
| N(3)-C(12)-C(11)    | 119.66(16) |
| N(6)-C(12)-C(11)    | 128.90(17) |
| N(3)-C(13)-C(14)    | 109.63(17) |
| N(3)-C(13)-H(13)    | 125.2      |
| C(14)-C(13)-H(13)   | 125.2      |
| N(6)-C(14)-C(13)    | 106.50(17) |
| N(6)-C(14)-H(14)    | 126.7      |
| C(13)-C(14)-H(14)   | 126.7      |
| N(6)-C(15)-H(15A)   | 109.5      |
| N(6)-C(15)-H(15B)   | 109.5      |
| H(15A)-C(15)-H(15B) | 109.5      |
| N(6)-C(15)-H(15C)   | 109.5      |
| H(15A)-C(15)-H(15C) | 109.5      |
| H(15B)-C(15)-H(15C) | 109.5      |
| C(17)-C(16)-S(2)    | 117.69(13) |
| C(17)-C(16)-H(16A)  | 107.9      |
| S(2)-C(16)-H(16A)   | 107.9      |
| C(17)-C(16)-H(16B)  | 107.9      |
| S(2)-C(16)-H(16B)   | 107.9      |
| H(16A)-C(16)-H(16B) | 107.2      |
| C(18)-C(17)-C(25)   | 106.96(16) |
| C(18)-C(17)-C(16)   | 107.67(15) |
| C(25)-C(17)-C(16)   | 111.89(16) |
| C(18)-C(17)-C(19)   | 106.25(15) |
| C(25)-C(17)-C(19)   | 111.65(15) |
| C(16)-C(17)-C(19)   | 112.05(15) |
| C(17)-C(18)-H(18A)  | 109.5      |
| C(17)-C(18)-H(18B)  | 109.5      |
| H(18A)-C(18)-H(18B) | 109.5      |
| C(17)-C(18)-H(18C)  | 109.5      |
| H(18A)-C(18)-H(18C) | 109.5      |
| H(18B)-C(18)-H(18C) | 109.5      |
| N(7)-C(19)-C(17)    | 113.04(15) |
| N(7)-C(19)-H(19A)   | 109.0      |

|                     |            |
|---------------------|------------|
| C(17)-C(19)-H(19A)  | 109.0      |
| N(7)-C(19)-H(19B)   | 109.0      |
| C(17)-C(19)-H(19B)  | 109.0      |
| H(19A)-C(19)-H(19B) | 107.8      |
| N(7)-C(20)-C(21)    | 114.79(17) |
| N(7)-C(20)-H(20)    | 122.6      |
| C(21)-C(20)-H(20)   | 122.6      |
| N(10)-C(21)-N(9)    | 111.29(17) |
| N(10)-C(21)-C(20)   | 119.97(16) |
| N(11)-C(21)-C(20)   | 128.74(17) |
| N(10)-C(22)-C(23)   | 109.65(18) |
| N(10)-C(22)-H(22)   | 125.2      |
| C(23)-C(22)-H(22)   | 125.2      |
| C(22)-C(23)-N(11)   | 106.58(17) |
| C(22)-C(23)-H(23)   | 126.7      |
| N(11)-C(23)-H(23)   | 126.7      |
| N(11)-C(24)-H(24A)  | 109.5      |
| N(11)-C(24)-H(24B)  | 109.5      |
| H(24A)-C(24)-H(24B) | 109.5      |
| N(11)-C(24)-H(24C)  | 109.5      |
| H(24A)-C(24)-H(24C) | 109.5      |
| H(24B)-C(24)-H(24C) | 109.5      |
| N(8)-C(25)-C(17)    | 112.96(15) |
| N(8)-C(25)-H(25A)   | 109.0      |
| C(17)-C(25)-H(25A)  | 109.0      |
| N(8)-C(25)-H(25B)   | 109.0      |
| C(17)-C(25)-H(25B)  | 109.0      |
| H(25A)-C(25)-H(25B) | 107.8      |
| N(8)-C(26)-C(27)    | 115.31(18) |
| N(8)-C(26)-H(26)    | 122.3      |
| C(27)-C(26)-H(26)   | 122.3      |
| N(9)-C(27)-N(12)    | 111.35(17) |
| N(9)-C(27)-C(26)    | 120.03(17) |
| N(12)-C(27)-C(26)   | 128.62(18) |
| C(29)-C(28)-N(9)    | 109.32(19) |
| C(29)-C(28)-H(28)   | 125.3      |

|                     |            |
|---------------------|------------|
| N(9)-C(28)-H(28)    | 125.3      |
| C(28)-C(29)-N(12)   | 106.85(18) |
| C(28)-C(29)-H(29)   | 126.6      |
| N(12)-C(29)-H(29)   | 126.6      |
| N(12)-C(30)-H(30A)  | 109.5      |
| N(12)-C(30)-H(30B)  | 109.5      |
| H(30A)-C(30)-H(30B) | 109.5      |
| N(12)-C(30)-H(30C)  | 109.5      |
| H(30A)-C(30)-H(30C) | 109.5      |
| H(30B)-C(30)-H(30C) | 109.5      |
| C(32)-C(31)-H(31A)  | 109.5      |
| C(32)-C(31)-H(31B)  | 109.5      |
| H(31A)-C(31)-H(31B) | 109.5      |
| C(32)-C(31)-H(31C)  | 109.5      |
| H(31A)-C(31)-H(31C) | 109.5      |
| H(31B)-C(31)-H(31C) | 109.5      |
| N(13)-C(32)-C(31)   | 179.5(3)   |
| C(34)-C(33)-H(33A)  | 109.5      |
| C(34)-C(33)-H(33B)  | 109.5      |
| H(33A)-C(33)-H(33B) | 109.5      |
| C(34)-C(33)-H(33C)  | 109.5      |
| H(33A)-C(33)-H(33C) | 109.5      |
| H(33B)-C(33)-H(33C) | 109.5      |
| N(14)-C(34)-C(33)   | 179.0(3)   |
| C(36)-C(35)-H(35A)  | 109.5      |
| C(36)-C(35)-H(35B)  | 109.5      |
| H(35A)-C(35)-H(35B) | 109.5      |
| C(36)-C(35)-H(35C)  | 109.5      |
| H(35A)-C(35)-H(35C) | 109.5      |
| H(35B)-C(35)-H(35C) | 109.5      |
| N(15)-C(36)-C(35)   | 179.0(3)   |
| C(5)-N(1)-C(4)      | 119.70(16) |
| C(5)-N(1)-Co(1)     | 115.09(13) |
| C(4)-N(1)-Co(1)     | 123.81(11) |
| C(6)-N(4)-C(7)      | 106.26(15) |
| C(6)-N(4)-Co(1)     | 111.73(12) |

|                   |            |
|-------------------|------------|
| C(7)-N(4)-Co(1)   | 141.63(13) |
| C(6)-N(5)-C(8)    | 107.05(15) |
| C(6)-N(5)-C(9)    | 126.51(17) |
| C(8)-N(5)-C(9)    | 126.45(16) |
| C(11)-N(2)-C(10)  | 118.62(16) |
| C(11)-N(2)-Co(1)  | 116.38(12) |
| C(10)-N(2)-Co(1)  | 123.23(12) |
| C(12)-N(3)-C(13)  | 105.46(16) |
| C(12)-N(3)-Co(1)  | 111.83(12) |
| C(13)-N(3)-Co(1)  | 142.08(13) |
| C(12)-N(6)-C(14)  | 106.98(16) |
| C(12)-N(6)-C(15)  | 125.85(17) |
| C(14)-N(6)-C(15)  | 127.07(17) |
| C(20)-N(7)-C(19)  | 118.82(16) |
| C(20)-N(7)-Co(2)  | 116.96(13) |
| C(19)-N(7)-Co(2)  | 123.14(12) |
| C(21)-N(10)-C(22) | 105.87(16) |
| C(21)-N(10)-Co(2) | 111.27(12) |
| C(22)-N(10)-Co(2) | 142.45(13) |
| C(21)-N(11)-C(23) | 106.60(16) |
| C(21)-N(11)-C(24) | 126.43(18) |
| C(23)-N(11)-C(24) | 126.93(17) |
| C(26)-N(8)-C(25)  | 120.28(17) |
| C(26)-N(8)-Co(2)  | 115.07(13) |
| C(25)-N(8)-Co(2)  | 123.85(12) |
| C(27)-N(9)-C(28)  | 105.85(17) |
| C(27)-N(9)-Co(2)  | 113.38(12) |
| C(28)-N(9)-Co(2)  | 140.73(15) |
| C(27)-N(12)-C(29) | 106.63(18) |
| C(27)-N(12)-C(30) | 127.00(19) |
| C(29)-N(12)-C(30) | 126.37(18) |
| F(6)-P(1)-F(2)    | 179.50(8)  |
| F(6)-P(1)-F(4)    | 90.25(8)   |
| F(2)-P(1)-F(4)    | 89.53(8)   |
| F(6)-P(1)-F(1)    | 90.25(8)   |
| F(2)-P(1)-F(1)    | 90.20(9)   |

|                  |            |
|------------------|------------|
| F(4)-P(1)-F(1)   | 90.09(8)   |
| F(6)-P(1)-F(3)   | 89.83(7)   |
| F(2)-P(1)-F(3)   | 89.73(8)   |
| F(4)-P(1)-F(3)   | 89.93(7)   |
| F(1)-P(1)-F(3)   | 179.93(12) |
| F(6)-P(1)-F(5)   | 89.95(7)   |
| F(2)-P(1)-F(5)   | 90.28(8)   |
| F(4)-P(1)-F(5)   | 179.78(9)  |
| F(1)-P(1)-F(5)   | 89.81(8)   |
| F(3)-P(1)-F(5)   | 90.17(7)   |
| F(10)-P(2)-F(9)  | 89.82(12)  |
| F(10)-P(2)-F(11) | 178.72(11) |
| F(9)-P(2)-F(11)  | 89.83(9)   |
| F(10)-P(2)-F(7)  | 91.59(11)  |
| F(9)-P(2)-F(7)   | 178.29(11) |
| F(11)-P(2)-F(7)  | 88.78(9)   |
| F(10)-P(2)-F(12) | 89.41(9)   |
| F(9)-P(2)-F(12)  | 90.75(9)   |
| F(11)-P(2)-F(12) | 89.37(7)   |
| F(7)-P(2)-F(12)  | 90.23(9)   |
| F(10)-P(2)-F(8)  | 91.62(10)  |
| F(9)-P(2)-F(8)   | 88.97(9)   |
| F(11)-P(2)-F(8)  | 89.61(8)   |
| F(7)-P(2)-F(8)   | 90.03(9)   |
| F(12)-P(2)-F(8)  | 178.94(9)  |
| C(1)-S(1)-Co(1)  | 105.46(6)  |
| C(1)-S(1)-Co(2)  | 120.65(6)  |
| Co(1)-S(1)-Co(2) | 87.862(17) |
| C(16)-S(2)-Co(2) | 106.73(6)  |
| C(16)-S(2)-Co(1) | 119.67(7)  |
| Co(2)-S(2)-Co(1) | 87.818(17) |
| N(2)-Co(1)-N(5)  | 92.60(6)   |
| N(2)-Co(1)-N(4)  | 150.23(6)  |
| N(5)-Co(1)-N(4)  | 76.48(6)   |
| N(2)-Co(1)-N(1)  | 77.05(6)   |
| N(5)-Co(1)-N(1)  | 105.20(6)  |

|                   |            |
|-------------------|------------|
| N(4)-Co(1)-N(1)   | 79.25(6)   |
| N(2)-Co(1)-S(1)   | 103.02(4)  |
| N(5)-Co(1)-S(1)   | 163.69(4)  |
| N(4)-Co(1)-S(1)   | 91.71(4)   |
| N(1)-Co(1)-S(1)   | 83.16(4)   |
| N(2)-Co(1)-S(2)   | 94.49(5)   |
| N(5)-Co(1)-S(2)   | 92.32(5)   |
| N(4)-Co(1)-S(2)   | 113.30(4)  |
| N(1)-Co(1)-S(2)   | 160.73(4)  |
| S(1)-Co(1)-S(2)   | 81.940(17) |
| N(11)-Co(2)-N(7)  | 145.55(6)  |
| N(11)-Co(2)-N(8)  | 89.07(6)   |
| N(7)-Co(2)-N(8)   | 76.53(6)   |
| N(11)-Co(2)-N(10) | 75.89(6)   |
| N(7)-Co(2)-N(10)  | 78.48(6)   |
| N(8)-Co(2)-N(10)  | 106.50(6)  |
| N(11)-Co(2)-S(2)  | 106.72(5)  |
| N(7)-Co(2)-S(2)   | 92.23(4)   |
| N(8)-Co(2)-S(2)   | 163.51(5)  |
| N(10)-Co(2)-S(2)  | 82.52(4)   |
| N(11)-Co(2)-S(1)  | 96.58(5)   |
| N(7)-Co(2)-S(1)   | 114.69(4)  |
| N(8)-Co(2)-S(1)   | 91.63(4)   |
| N(10)-Co(2)-S(1)  | 160.04(4)  |
| S(2)-Co(2)-S(1)   | 82.052(17) |

---

Symmetry transformations used to generate equivalent atoms:



**Table S22.** Anisotropic displacement parameters ( $\text{\AA}^2 \times 10^3$ ) for  $[\text{Co}^{\text{II}}(\text{tame-}(\text{N}_2\text{S}(\text{MeIm})_2)_2(\text{PF}_6)_2 \bullet 2\text{MeCN})]$  (**4**). The anisotropic displacement factor exponent takes the form:  $-2p^2 [ h^2 a^{*2} U^{11} + \dots + 2 h k a^* b^* U^{12} ]$

|       | U <sup>11</sup> | U <sup>22</sup> | U <sup>33</sup> | U <sup>23</sup> | U <sup>13</sup> | U <sup>12</sup> |
|-------|-----------------|-----------------|-----------------|-----------------|-----------------|-----------------|
| C(1)  | 21(1)           | 19(1)           | 19(1)           | 6(1)            | 6(1)            | 2(1)            |
| C(2)  | 19(1)           | 16(1)           | 19(1)           | 5(1)            | 4(1)            | 0(1)            |
| C(3)  | 27(1)           | 19(1)           | 26(1)           | 8(1)            | 5(1)            | -1(1)           |
| C(4)  | 22(1)           | 15(1)           | 21(1)           | 5(1)            | 2(1)            | 2(1)            |
| C(5)  | 17(1)           | 20(1)           | 17(1)           | 2(1)            | 2(1)            | 4(1)            |
| C(6)  | 15(1)           | 18(1)           | 17(1)           | -1(1)           | 3(1)            | 2(1)            |
| C(7)  | 19(1)           | 15(1)           | 20(1)           | 1(1)            | 4(1)            | -1(1)           |
| C(8)  | 20(1)           | 16(1)           | 23(1)           | -2(1)           | 6(1)            | -1(1)           |
| C(9)  | 24(1)           | 27(1)           | 19(1)           | -3(1)           | -1(1)           | 1(1)            |
| C(10) | 20(1)           | 15(1)           | 21(1)           | 2(1)            | 4(1)            | -1(1)           |
| C(11) | 19(1)           | 14(1)           | 20(1)           | -1(1)           | 0(1)            | 2(1)            |
| C(12) | 16(1)           | 18(1)           | 18(1)           | 0(1)            | 2(1)            | 3(1)            |
| C(13) | 20(1)           | 20(1)           | 27(1)           | 2(1)            | 6(1)            | -2(1)           |
| C(14) | 19(1)           | 26(1)           | 27(1)           | 2(1)            | 9(1)            | 0(1)            |
| C(15) | 31(1)           | 28(1)           | 31(1)           | -8(1)           | 12(1)           | 2(1)            |
| C(16) | 22(1)           | 20(1)           | 18(1)           | 5(1)            | 4(1)            | 0(1)            |
| C(17) | 21(1)           | 20(1)           | 15(1)           | 2(1)            | 5(1)            | 1(1)            |
| C(18) | 32(1)           | 30(1)           | 20(1)           | 3(1)            | 10(1)           | 2(1)            |
| C(19) | 21(1)           | 19(1)           | 19(1)           | 0(1)            | 7(1)            | 3(1)            |
| C(20) | 21(1)           | 14(1)           | 19(1)           | 1(1)            | 1(1)            | 2(1)            |
| C(21) | 18(1)           | 16(1)           | 22(1)           | 2(1)            | 1(1)            | -2(1)           |
| C(22) | 22(1)           | 26(1)           | 22(1)           | 3(1)            | 7(1)            | 0(1)            |
| C(23) | 25(1)           | 26(1)           | 28(1)           | 6(1)            | 7(1)            | -3(1)           |
| C(24) | 39(1)           | 18(1)           | 42(1)           | -3(1)           | 10(1)           | -6(1)           |
| C(25) | 24(1)           | 21(1)           | 16(1)           | 3(1)            | 2(1)            | 3(1)            |
| C(26) | 18(1)           | 18(1)           | 23(1)           | 3(1)            | 0(1)            | 3(1)            |
| C(27) | 17(1)           | 17(1)           | 25(1)           | -1(1)           | 4(1)            | 1(1)            |
| C(28) | 26(1)           | 28(1)           | 24(1)           | -3(1)           | 11(1)           | -2(1)           |
| C(29) | 23(1)           | 30(1)           | 34(1)           | -8(1)           | 11(1)           | 1(1)            |
| C(30) | 32(1)           | 31(1)           | 44(1)           | -6(1)           | -1(1)           | 19(1)           |

|       |       |        |        |        |       |        |
|-------|-------|--------|--------|--------|-------|--------|
| C(31) | 42(1) | 30(1)  | 44(1)  | 5(1)   | 1(1)  | 9(1)   |
| C(32) | 34(1) | 37(1)  | 38(1)  | 6(1)   | 4(1)  | -1(1)  |
| C(33) | 33(1) | 81(2)  | 46(2)  | -6(2)  | 14(1) | 5(1)   |
| C(34) | 40(1) | 40(2)  | 38(1)  | -4(1)  | 22(1) | -2(1)  |
| C(35) | 31(1) | 41(1)  | 35(1)  | 2(1)   | 6(1)  | 5(1)   |
| C(36) | 44(1) | 27(1)  | 35(1)  | 7(1)   | 9(1)  | 2(1)   |
| N(1)  | 15(1) | 17(1)  | 19(1)  | 2(1)   | 2(1)  | 2(1)   |
| N(4)  | 18(1) | 14(1)  | 17(1)  | -1(1)  | 4(1)  | 0(1)   |
| N(5)  | 17(1) | 21(1)  | 17(1)  | -4(1)  | 2(1)  | -1(1)  |
| N(2)  | 17(1) | 16(1)  | 16(1)  | 1(1)   | 1(1)  | 0(1)   |
| N(3)  | 18(1) | 17(1)  | 20(1)  | 2(1)   | 4(1)  | 2(1)   |
| N(6)  | 19(1) | 22(1)  | 21(1)  | -1(1)  | 6(1)  | 2(1)   |
| N(7)  | 18(1) | 16(1)  | 18(1)  | 3(1)   | 3(1)  | 3(1)   |
| N(10) | 19(1) | 18(1)  | 19(1)  | 2(1)   | 3(1)  | 1(1)   |
| N(11) | 25(1) | 17(1)  | 26(1)  | 2(1)   | 5(1)  | -3(1)  |
| N(8)  | 18(1) | 18(1)  | 17(1)  | 0(1)   | 2(1)  | 0(1)   |
| N(9)  | 22(1) | 18(1)  | 21(1)  | -1(1)  | 6(1)  | 1(1)   |
| N(12) | 19(1) | 22(1)  | 31(1)  | -5(1)  | 3(1)  | 5(1)   |
| N(13) | 51(2) | 85(2)  | 63(2)  | 0(2)   | 22(1) | 10(1)  |
| N(14) | 62(2) | 57(2)  | 49(1)  | 10(1)  | 22(1) | 18(1)  |
| N(15) | 79(2) | 33(1)  | 41(1)  | 7(1)   | -1(1) | -2(1)  |
| F(1)  | 69(1) | 23(1)  | 59(1)  | -10(1) | 38(1) | -5(1)  |
| F(2)  | 83(1) | 45(1)  | 38(1)  | 24(1)  | 27(1) | 34(1)  |
| F(3)  | 33(1) | 25(1)  | 30(1)  | -2(1)  | 6(1)  | 3(1)   |
| F(4)  | 37(1) | 30(1)  | 48(1)  | -2(1)  | 26(1) | -1(1)  |
| F(5)  | 33(1) | 47(1)  | 37(1)  | 3(1)   | 15(1) | 13(1)  |
| F(6)  | 34(1) | 39(1)  | 26(1)  | 8(1)   | 3(1)  | 0(1)   |
| F(7)  | 62(1) | 52(1)  | 60(1)  | 29(1)  | -9(1) | -14(1) |
| F(8)  | 26(1) | 46(1)  | 76(1)  | 0(1)   | -9(1) | 5(1)   |
| F(9)  | 54(1) | 21(1)  | 114(2) | -2(1)  | 32(1) | 4(1)   |
| F(10) | 67(1) | 132(2) | 34(1)  | -34(1) | -2(1) | -30(1) |
| F(11) | 32(1) | 48(1)  | 30(1)  | 0(1)   | 10(1) | 7(1)   |
| F(12) | 28(1) | 65(1)  | 45(1)  | -22(1) | 13(1) | 0(1)   |
| P(1)  | 33(1) | 19(1)  | 25(1)  | 4(1)   | 14(1) | 5(1)   |
| P(2)  | 26(1) | 30(1)  | 27(1)  | -3(1)  | 2(1)  | -3(1)  |
| S(1)  | 18(1) | 15(1)  | 16(1)  | 1(1)   | 3(1)  | 1(1)   |

|       |       |       |       |      |      |      |
|-------|-------|-------|-------|------|------|------|
| S(2)  | 18(1) | 16(1) | 16(1) | 2(1) | 2(1) | 0(1) |
| Co(1) | 16(1) | 13(1) | 15(1) | 0(1) | 2(1) | 0(1) |
| Co(2) | 16(1) | 14(1) | 15(1) | 0(1) | 3(1) | 1(1) |

---

---

**Table S23.** Hydrogen coordinates ( $\times 10^4$ ) and isotropic displacement parameters ( $\text{\AA}^2 \times 10^3$ ) for  $[\text{Co}^{\text{II}}(\text{tame}-(\text{N}_2\text{S}^{\text{Me}}\text{Im})_2)]_2(\text{PF}_6)_2 \cdot 2\text{MeCN}$  (**4**).

|        | x     | y    | z    | U(eq) |
|--------|-------|------|------|-------|
| H(1A)  | 2247  | 1607 | 4717 | 23    |
| H(1B)  | 1175  | 1175 | 3993 | 23    |
| H(3A)  | 1579  | -615 | 3976 | 36    |
| H(3B)  | 2430  | -233 | 4802 | 36    |
| H(3C)  | 2995  | -893 | 4197 | 36    |
| H(4A)  | 4368  | 872  | 4907 | 23    |
| H(4B)  | 4780  | 405  | 4162 | 23    |
| H(5)   | 5780  | 2300 | 5250 | 22    |
| H(7)   | 5500  | 5376 | 3565 | 21    |
| H(8)   | 6864  | 5910 | 4849 | 24    |
| H(9A)  | 6691  | 3894 | 6116 | 37    |
| H(9B)  | 7414  | 5016 | 6105 | 37    |
| H(9C)  | 7985  | 4001 | 5834 | 37    |
| H(10A) | 2925  | -301 | 2976 | 23    |
| H(10B) | 1843  | 456  | 2834 | 23    |
| H(11)  | 4148  | 66   | 2175 | 22    |
| H(13)  | 6457  | 3732 | 2270 | 27    |
| H(14)  | 7025  | 2547 | 1284 | 28    |
| H(15A) | 5746  | -100 | 1373 | 45    |
| H(15B) | 6506  | 560  | 866  | 45    |
| H(15C) | 5004  | 453  | 675  | 45    |
| H(16A) | 2909  | 4604 | 1231 | 24    |
| H(16B) | 3794  | 3695 | 1342 | 24    |
| H(18A) | 1622  | 2762 | -341 | 40    |
| H(18B) | 3071  | 2794 | 68   | 40    |
| H(18C) | 2460  | 3850 | -88  | 40    |
| H(19A) | 1586  | 1561 | 582  | 23    |
| H(19B) | 2787  | 1888 | 1261 | 23    |
| H(20)  | 322   | 505  | 1079 | 22    |
| H(22)  | -1437 | 1809 | 3379 | 28    |

|        |       |       |       |    |
|--------|-------|-------|-------|----|
| H(23)  | -2336 | 1     | 2922  | 32 |
| H(24A) | -1678 | -800  | 1130  | 50 |
| H(24B) | -2129 | -1320 | 1821  | 50 |
| H(24C) | -681  | -1248 | 1776  | 50 |
| H(25A) | 670   | 4214  | 481   | 24 |
| H(25B) | 27    | 3045  | 379   | 24 |
| H(26)  | -716  | 4877  | 1145  | 24 |
| H(28)  | -372  | 4088  | 3956  | 31 |
| H(29)  | -1812 | 5430  | 3626  | 35 |
| H(30A) | -1649 | 6596  | 2088  | 55 |
| H(30B) | -2881 | 6109  | 2336  | 55 |
| H(30C) | -2515 | 5640  | 1576  | 55 |
| H(31A) | 2396  | 5962  | 2400  | 59 |
| H(31B) | 3004  | 7057  | 2222  | 59 |
| H(31C) | 1896  | 6408  | 1598  | 59 |
| H(33A) | 9385  | 8615  | 4400  | 79 |
| H(33B) | 8692  | 7472  | 4370  | 79 |
| H(33C) | 9524  | 7740  | 3763  | 79 |
| H(35A) | 4383  | 3403  | -858  | 54 |
| H(35B) | 5562  | 2856  | -1023 | 54 |
| H(35C) | 5352  | 3991  | -1280 | 54 |

---

**Table S24.** Crystal data and structure refinement for Thioether-Ligated [Fe<sup>II</sup>(tame-(N<sub>2</sub>S<sup>Bz/Me</sup>Im)<sub>2</sub>(MeCN))](PF<sub>6</sub>)<sub>2</sub>•MeCN (**5**)

|                                   |                                                                                    |                 |
|-----------------------------------|------------------------------------------------------------------------------------|-----------------|
| Identification code               | bk17_152_0m                                                                        |                 |
| Empirical formula                 | C <sub>26</sub> H <sub>34</sub> F <sub>12</sub> Fe N <sub>8</sub> P <sub>2</sub> S |                 |
| Formula weight                    | 836.46                                                                             |                 |
| Temperature                       | 100(2) K                                                                           |                 |
| Wavelength                        | 0.71073 Å                                                                          |                 |
| Crystal system                    | Triclinic                                                                          |                 |
| Space group                       | P -1                                                                               |                 |
| Unit cell dimensions              | a = 11.2287(11) Å                                                                  | α = 88.369(5)°. |
|                                   | b = 12.2948(13) Å                                                                  | β = 74.465(5)°. |
|                                   | c = 12.7375(14) Å                                                                  | γ = 84.959(5)°. |
| Volume                            | 1687.7(3) Å <sup>3</sup>                                                           |                 |
| Z                                 | 2                                                                                  |                 |
| Density (calculated)              | 1.646 mg/m <sup>3</sup>                                                            |                 |
| Absorption coefficient            | 0.704 mm <sup>-1</sup>                                                             |                 |
| F(000)                            | 852                                                                                |                 |
| Crystal size                      | 0.08 x 0.03 x 0.03 mm <sup>3</sup>                                                 |                 |
| Theta range for data collection   | 2.16 to 26.47°.                                                                    |                 |
| Index ranges                      | -13 ≤ h ≤ 14, -15 ≤ k ≤ 15, -15 ≤ l ≤ 15                                           |                 |
| Reflections collected             | 21050                                                                              |                 |
| Independent reflections           | 6841 [R(int) = 0.0820]                                                             |                 |
| Completeness to theta = 25.00°    | 99.2 %                                                                             |                 |
| Max. and min. transmission        | 0.9792 and 0.9459                                                                  |                 |
| Refinement method                 | Full-matrix least-squares on F <sup>2</sup>                                        |                 |
| Data / restraints / parameters    | 6841 / 0 / 456                                                                     |                 |
| Goodness-of-fit on F <sup>2</sup> | 1.012                                                                              |                 |
| Final R indices [I > 2σ(I)]       | R1 = 0.0598, wR2 = 0.1207                                                          |                 |
| R indices (all data)              | R1 = 0.1222, wR2 = 0.1446                                                          |                 |
| Largest diff. peak and hole       | 0.822 and -0.556 e.Å <sup>-3</sup>                                                 |                 |

**Table S25.** Atomic coordinates ( $\times 10^4$ ) and equivalent isotropic displacement parameters ( $\text{\AA}^2 \times 10^3$ ) for Thioether-Ligated  $[\text{Fe}^{\text{II}}(\text{tame}-(\text{N}_2\text{S}^{\text{Bz}}(\text{MeIm})_2(\text{MeCN})))(\text{PF}_6)_2 \bullet \text{MeCN}$  (**5**).  $U(\text{eq})$  is defined as one third of the trace of the orthogonalized  $U^{\text{ij}}$  tensor.

|       | x        | y        | z        | U(eq) |
|-------|----------|----------|----------|-------|
| C(1)  | 5849(4)  | 6262(4)  | 8632(3)  | 18(1) |
| C(2)  | 5006(4)  | 8226(4)  | 7761(4)  | 23(1) |
| C(3)  | 5756(4)  | 9147(4)  | 7170(4)  | 18(1) |
| C(4)  | 5091(5)  | 10235(4) | 7671(4)  | 27(1) |
| C(5)  | 5817(4)  | 9164(3)  | 5954(4)  | 18(1) |
| C(6)  | 5674(4)  | 7724(4)  | 4797(4)  | 17(1) |
| C(7)  | 6041(4)  | 6604(4)  | 4505(3)  | 17(1) |
| C(8)  | 7010(4)  | 5033(4)  | 4587(4)  | 16(1) |
| C(9)  | 6319(4)  | 4964(4)  | 3864(4)  | 20(1) |
| C(10) | 4837(4)  | 6260(4)  | 3162(4)  | 20(1) |
| C(11) | 7090(4)  | 9070(4)  | 7321(4)  | 23(1) |
| C(12) | 8540(4)  | 7607(4)  | 7511(4)  | 18(1) |
| C(13) | 9006(4)  | 6502(4)  | 7208(4)  | 17(1) |
| C(14) | 9111(4)  | 4993(4)  | 6351(3)  | 16(1) |
| C(15) | 9960(4)  | 4869(4)  | 6946(4)  | 19(1) |
| C(16) | 10646(4) | 6066(4)  | 8205(4)  | 24(1) |
| C(17) | 4663(4)  | 6358(4)  | 9522(3)  | 16(1) |
| C(18) | 3668(4)  | 5780(4)  | 9484(4)  | 17(1) |
| C(19) | 2546(4)  | 5914(4)  | 10281(4) | 19(1) |
| C(20) | 2421(4)  | 6624(4)  | 11126(4) | 23(1) |
| C(21) | 3396(5)  | 7198(4)  | 11188(4) | 26(1) |
| C(22) | 4530(4)  | 7069(4)  | 10386(4) | 21(1) |
| C(23) | 9332(5)  | 7966(4)  | 4158(4)  | 23(1) |
| C(24) | 10177(4) | 8521(4)  | 3290(4)  | 25(1) |
| C(25) | 8449(7)  | 614(5)   | 9790(6)  | 58(2) |
| C(26) | 8551(6)  | 1128(5)  | 10743(5) | 49(2) |
| N(1)  | 6183(3)  | 8074(3)  | 5496(3)  | 15(1) |
| N(3)  | 6841(3)  | 6063(3)  | 4985(3)  | 16(1) |
| N(5)  | 5704(3)  | 5955(3)  | 3821(3)  | 16(1) |

|       |         |         |          |       |
|-------|---------|---------|----------|-------|
| N(2)  | 7734(3) | 7994(3) | 7017(3)  | 16(1) |
| N(3)  | 8505(3) | 6008(3) | 6523(3)  | 15(1) |
| N(6)  | 9882(3) | 5823(3) | 7495(3)  | 16(1) |
| N(7)  | 8668(3) | 7526(3) | 4815(3)  | 18(1) |
| N(8)  | 8413(7) | 188(5)  | 9001(6)  | 87(2) |
| F(1)  | 493(3)  | 3320(3) | 9068(3)  | 48(1) |
| F(2)  | 1284(4) | 1569(3) | 8838(3)  | 66(1) |
| F(3)  | 2428(3) | 3857(2) | 8689(3)  | 50(1) |
| F(4)  | 3205(3) | 2122(3) | 8488(3)  | 46(1) |
| F(5)  | 1890(3) | 2813(3) | 7523(2)  | 46(1) |
| F(6)  | 1816(3) | 2651(4) | 10030(3) | 70(1) |
| F(7)  | 8947(3) | 1642(3) | 3063(2)  | 39(1) |
| F(8)  | 8658(3) | 2641(2) | 4596(3)  | 36(1) |
| F(9)  | 7044(3) | 2469(2) | 3877(3)  | 39(1) |
| F(10) | 7372(3) | 633(2)  | 3923(2)  | 33(1) |
| F(11) | 7095(3) | 1621(2) | 5463(2)  | 34(1) |
| F(12) | 8981(3) | 804(2)  | 4646(3)  | 38(1) |
| P(1)  | 1852(1) | 2699(1) | 8791(1)  | 23(1) |
| P(2)  | 8027(1) | 1637(1) | 4256(1)  | 25(1) |
| S(1)  | 5580(1) | 6815(1) | 7354(1)  | 15(1) |
| Fe(1) | 7328(1) | 7037(1) | 5999(1)  | 13(1) |

---



**Table S26.** Bond lengths [Å] and angles [°] for Thioether-Ligated [Fe<sup>II</sup>(tame-(N<sub>2</sub>S<sup>Bz</sup>(<sup>Me</sup>Im)<sub>2</sub>(MeCN)))](PF<sub>6</sub>)<sub>2</sub>•MeCN (**5**).

---

|              |          |
|--------------|----------|
| C(1)-C(17)   | 1.498(6) |
| C(1)-S(1)    | 1.835(4) |
| C(1)-H(1A)   | 0.9900   |
| C(1)-H(1B)   | 0.9900   |
| C(2)-C(3)    | 1.528(6) |
| C(2)-S(1)    | 1.836(4) |
| C(2)-H(2A)   | 0.9900   |
| C(2)-H(2B)   | 0.9900   |
| C(3)-C(5)    | 1.531(6) |
| C(3)-C(4)    | 1.540(6) |
| C(3)-C(11)   | 1.555(6) |
| C(4)-H(4A)   | 0.9800   |
| C(4)-H(4B)   | 0.9800   |
| C(4)-H(4C)   | 0.9800   |
| C(5)-N(1)    | 1.458(5) |
| C(5)-H(5A)   | 0.9900   |
| C(5)-H(5B)   | 0.9900   |
| C(6)-N(1)    | 1.281(5) |
| C(6)-C(7)    | 1.432(6) |
| C(6)-H(6)    | 0.9500   |
| C(7)-N(3)    | 1.337(5) |
| C(7)-N(5)    | 1.345(5) |
| C(8)-N(3)    | 1.357(5) |
| C(8)-C(9)    | 1.361(6) |
| C(8)-H(8)    | 0.9500   |
| C(9)-N(5)    | 1.354(6) |
| C(9)-H(9)    | 0.9500   |
| C(10)-N(5)   | 1.466(5) |
| C(10)-H(10A) | 0.9800   |
| C(10)-H(10B) | 0.9800   |
| C(10)-H(10C) | 0.9800   |
| C(11)-N(2)   | 1.461(5) |
| C(11)-H(11A) | 0.9900   |

|              |          |
|--------------|----------|
| C(11)-H(11B) | 0.9900   |
| C(12)-N(2)   | 1.287(5) |
| C(12)-C(13)  | 1.436(6) |
| C(12)-H(12)  | 0.9500   |
| C(13)-N(4)   | 1.341(5) |
| C(13)-N(6)   | 1.352(5) |
| C(14)-N(4)   | 1.362(5) |
| C(14)-C(15)  | 1.364(6) |
| C(14)-H(14)  | 0.9500   |
| C(15)-N(6)   | 1.368(6) |
| C(15)-H(15)  | 0.9500   |
| C(16)-N(6)   | 1.456(5) |
| C(16)-H(16A) | 0.9800   |
| C(16)-H(16B) | 0.9800   |
| C(16)-H(16C) | 0.9800   |
| C(17)-C(18)  | 1.388(6) |
| C(17)-C(22)  | 1.394(6) |
| C(18)-C(19)  | 1.391(6) |
| C(18)-H(18)  | 0.9500   |
| C(19)-C(20)  | 1.375(6) |
| C(19)-H(19)  | 0.9500   |
| C(20)-C(21)  | 1.374(6) |
| C(20)-H(20)  | 0.9500   |
| C(21)-C(22)  | 1.402(7) |
| C(21)-H(21)  | 0.9500   |
| C(22)-H(22)  | 0.9500   |
| C(23)-N(7)   | 1.121(6) |
| C(23)-C(24)  | 1.449(7) |
| C(24)-H(24A) | 0.9800   |
| C(24)-H(24B) | 0.9800   |
| C(24)-H(24C) | 0.9800   |
| C(25)-N(8)   | 1.158(8) |
| C(25)-C(26)  | 1.420(9) |
| C(26)-H(26A) | 0.9800   |
| C(26)-H(26B) | 0.9800   |
| C(26)-H(26C) | 0.9800   |

|            |            |
|------------|------------|
| N(1)-Fe(1) | 1.948(4)   |
| N(3)-Fe(1) | 1.996(4)   |
| N(2)-Fe(1) | 1.941(4)   |
| N(4)-Fe(1) | 1.981(4)   |
| N(7)-Fe(1) | 1.947(4)   |
| F(1)-P(1)  | 1.600(3)   |
| F(2)-P(1)  | 1.572(3)   |
| F(3)-P(1)  | 1.603(3)   |
| F(4)-P(1)  | 1.572(3)   |
| F(5)-P(1)  | 1.608(3)   |
| F(6)-P(1)  | 1.566(3)   |
| F(7)-P(2)  | 1.591(3)   |
| F(8)-P(2)  | 1.601(3)   |
| F(9)-P(2)  | 1.599(3)   |
| F(10)-P(2) | 1.613(3)   |
| F(11)-P(2) | 1.613(3)   |
| F(12)-P(2) | 1.583(3)   |
| S(1)-Fe(1) | 2.2715(13) |

|                  |          |
|------------------|----------|
| C(17)-C(1)-S(1)  | 110.0(3) |
| C(17)-C(1)-H(1A) | 109.7    |
| S(1)-C(1)-H(1A)  | 109.7    |
| C(17)-C(1)-H(1B) | 109.7    |
| S(1)-C(1)-H(1B)  | 109.7    |
| H(1A)-C(1)-H(1B) | 108.2    |
| C(3)-C(2)-S(1)   | 118.1(3) |
| C(3)-C(2)-H(2A)  | 107.8    |
| S(1)-C(2)-H(2A)  | 107.8    |
| C(3)-C(2)-H(2B)  | 107.8    |
| S(1)-C(2)-H(2B)  | 107.8    |
| H(2A)-C(2)-H(2B) | 107.1    |
| C(2)-C(3)-C(5)   | 111.1(4) |
| C(2)-C(3)-C(4)   | 107.7(4) |
| C(5)-C(3)-C(4)   | 108.3(4) |
| C(2)-C(3)-C(11)  | 112.3(4) |
| C(5)-C(3)-C(11)  | 109.8(4) |

|                     |          |
|---------------------|----------|
| C(4)-C(3)-C(11)     | 107.4(4) |
| C(3)-C(4)-H(4A)     | 109.5    |
| C(3)-C(4)-H(4B)     | 109.5    |
| H(4A)-C(4)-H(4B)    | 109.5    |
| C(3)-C(4)-H(4C)     | 109.5    |
| H(4A)-C(4)-H(4C)    | 109.5    |
| H(4B)-C(4)-H(4C)    | 109.5    |
| N(1)-C(5)-C(3)      | 110.3(3) |
| N(1)-C(5)-H(5A)     | 109.6    |
| C(3)-C(5)-H(5A)     | 109.6    |
| N(1)-C(5)-H(5B)     | 109.6    |
| C(3)-C(5)-H(5B)     | 109.6    |
| H(5A)-C(5)-H(5B)    | 108.1    |
| N(1)-C(6)-C(7)      | 113.7(4) |
| N(1)-C(6)-H(6)      | 123.1    |
| C(7)-C(6)-H(6)      | 123.1    |
| N(3)-C(7)-N(5)      | 111.2(4) |
| N(3)-C(7)-C(6)      | 117.6(4) |
| N(5)-C(7)-C(6)      | 131.2(4) |
| N(3)-C(8)-C(9)      | 109.1(4) |
| N(3)-C(8)-H(8)      | 125.4    |
| C(9)-C(8)-H(8)      | 125.4    |
| N(5)-C(9)-C(8)      | 107.5(4) |
| N(5)-C(9)-H(9)      | 126.2    |
| C(8)-C(9)-H(9)      | 126.2    |
| N(5)-C(10)-H(10A)   | 109.5    |
| N(5)-C(10)-H(10B)   | 109.5    |
| H(10A)-C(10)-H(10B) | 109.5    |
| N(5)-C(10)-H(10C)   | 109.5    |
| H(10A)-C(10)-H(10C) | 109.5    |
| H(10B)-C(10)-H(10C) | 109.5    |
| N(2)-C(11)-C(3)     | 111.4(3) |
| N(2)-C(11)-H(11A)   | 109.4    |
| C(3)-C(11)-H(11A)   | 109.4    |
| N(2)-C(11)-H(11B)   | 109.4    |
| C(3)-C(11)-H(11B)   | 109.4    |

|                     |          |
|---------------------|----------|
| H(11A)-C(11)-H(11B) | 108.0    |
| N(2)-C(12)-C(13)    | 113.0(4) |
| N(2)-C(12)-H(12)    | 123.5    |
| C(13)-C(12)-H(12)   | 123.5    |
| N(4)-C(13)-N(6)     | 110.9(4) |
| N(4)-C(13)-C(12)    | 117.3(4) |
| N(6)-C(13)-C(12)    | 131.9(4) |
| N(4)-C(14)-C(15)    | 109.3(4) |
| N(4)-C(14)-H(14)    | 125.4    |
| C(15)-C(14)-H(14)   | 125.4    |
| C(14)-C(15)-N(6)    | 107.2(4) |
| C(14)-C(15)-H(15)   | 126.4    |
| N(6)-C(15)-H(15)    | 126.4    |
| N(6)-C(16)-H(16A)   | 109.5    |
| N(6)-C(16)-H(16B)   | 109.5    |
| H(16A)-C(16)-H(16B) | 109.5    |
| N(6)-C(16)-H(16C)   | 109.5    |
| H(16A)-C(16)-H(16C) | 109.5    |
| H(16B)-C(16)-H(16C) | 109.5    |
| C(18)-C(17)-C(22)   | 118.9(4) |
| C(18)-C(17)-C(1)    | 121.1(4) |
| C(22)-C(17)-C(1)    | 120.0(4) |
| C(17)-C(18)-C(19)   | 121.1(4) |
| C(17)-C(18)-H(18)   | 119.5    |
| C(19)-C(18)-H(18)   | 119.5    |
| C(20)-C(19)-C(18)   | 119.6(4) |
| C(20)-C(19)-H(19)   | 120.2    |
| C(18)-C(19)-H(19)   | 120.2    |
| C(21)-C(20)-C(19)   | 120.5(4) |
| C(21)-C(20)-H(20)   | 119.8    |
| C(19)-C(20)-H(20)   | 119.8    |
| C(20)-C(21)-C(22)   | 120.3(4) |
| C(20)-C(21)-H(21)   | 119.8    |
| C(22)-C(21)-H(21)   | 119.8    |
| C(17)-C(22)-C(21)   | 119.7(4) |
| C(17)-C(22)-H(22)   | 120.2    |

|                     |           |
|---------------------|-----------|
| C(21)-C(22)-H(22)   | 120.2     |
| N(7)-C(23)-C(24)    | 178.6(5)  |
| C(23)-C(24)-H(24A)  | 109.5     |
| C(23)-C(24)-H(24B)  | 109.5     |
| H(24A)-C(24)-H(24B) | 109.5     |
| C(23)-C(24)-H(24C)  | 109.5     |
| H(24A)-C(24)-H(24C) | 109.5     |
| H(24B)-C(24)-H(24C) | 109.5     |
| N(8)-C(25)-C(26)    | 177.5(9)  |
| C(25)-C(26)-H(26A)  | 109.5     |
| C(25)-C(26)-H(26B)  | 109.5     |
| H(26A)-C(26)-H(26B) | 109.5     |
| C(25)-C(26)-H(26C)  | 109.5     |
| H(26A)-C(26)-H(26C) | 109.5     |
| H(26B)-C(26)-H(26C) | 109.5     |
| C(6)-N(1)-C(5)      | 120.4(4)  |
| C(6)-N(1)-Fe(1)     | 116.7(3)  |
| C(5)-N(1)-Fe(1)     | 122.6(3)  |
| C(7)-N(3)-C(8)      | 105.6(4)  |
| C(7)-N(3)-Fe(1)     | 110.7(3)  |
| C(8)-N(3)-Fe(1)     | 143.7(3)  |
| C(7)-N(5)-C(9)      | 106.6(4)  |
| C(7)-N(5)-C(10)     | 126.7(4)  |
| C(9)-N(5)-C(10)     | 126.8(4)  |
| C(12)-N(2)-C(11)    | 119.1(4)  |
| C(12)-N(2)-Fe(1)    | 117.1(3)  |
| C(11)-N(2)-Fe(1)    | 123.5(3)  |
| C(13)-N(4)-C(14)    | 106.0(4)  |
| C(13)-N(4)-Fe(1)    | 111.1(3)  |
| C(14)-N(4)-Fe(1)    | 142.4(3)  |
| C(13)-N(6)-C(15)    | 106.7(4)  |
| C(13)-N(6)-C(16)    | 127.3(4)  |
| C(15)-N(6)-C(16)    | 126.0(4)  |
| C(23)-N(7)-Fe(1)    | 168.8(4)  |
| F(6)-P(1)-F(2)      | 92.8(2)   |
| F(6)-P(1)-F(4)      | 90.46(19) |

|                  |            |
|------------------|------------|
| F(2)-P(1)-F(4)   | 91.1(2)    |
| F(6)-P(1)-F(1)   | 90.87(19)  |
| F(2)-P(1)-F(1)   | 90.5(2)    |
| F(4)-P(1)-F(1)   | 177.9(2)   |
| F(6)-P(1)-F(3)   | 89.7(2)    |
| F(2)-P(1)-F(3)   | 177.4(2)   |
| F(4)-P(1)-F(3)   | 89.13(18)  |
| F(1)-P(1)-F(3)   | 89.26(19)  |
| F(6)-P(1)-F(5)   | 177.2(2)   |
| F(2)-P(1)-F(5)   | 89.8(2)    |
| F(4)-P(1)-F(5)   | 90.56(18)  |
| F(1)-P(1)-F(5)   | 88.04(18)  |
| F(3)-P(1)-F(5)   | 87.69(19)  |
| F(12)-P(2)-F(7)  | 90.05(17)  |
| F(12)-P(2)-F(9)  | 178.95(19) |
| F(7)-P(2)-F(9)   | 90.87(17)  |
| F(12)-P(2)-F(8)  | 90.33(16)  |
| F(7)-P(2)-F(8)   | 90.64(17)  |
| F(9)-P(2)-F(8)   | 90.19(16)  |
| F(12)-P(2)-F(11) | 89.72(17)  |
| F(7)-P(2)-F(11)  | 179.51(17) |
| F(9)-P(2)-F(11)  | 89.36(17)  |
| F(8)-P(2)-F(11)  | 89.79(16)  |
| F(12)-P(2)-F(10) | 90.23(16)  |
| F(7)-P(2)-F(10)  | 90.02(16)  |
| F(9)-P(2)-F(10)  | 89.25(16)  |
| F(8)-P(2)-F(10)  | 179.13(18) |
| F(11)-P(2)-F(10) | 89.55(16)  |
| C(1)-S(1)-C(2)   | 100.5(2)   |
| C(1)-S(1)-Fe(1)  | 114.82(15) |
| C(2)-S(1)-Fe(1)  | 102.66(16) |
| N(2)-Fe(1)-N(7)  | 91.13(15)  |
| N(2)-Fe(1)-N(1)  | 97.57(15)  |
| N(7)-Fe(1)-N(1)  | 88.59(15)  |
| N(2)-Fe(1)-N(4)  | 81.30(15)  |
| N(7)-Fe(1)-N(4)  | 91.13(15)  |

|                 |            |
|-----------------|------------|
| N(1)-Fe(1)-N(4) | 178.83(15) |
| N(2)-Fe(1)-N(3) | 177.72(15) |
| N(7)-Fe(1)-N(3) | 90.76(15)  |
| N(1)-Fe(1)-N(3) | 81.22(15)  |
| N(5)-Fe(1)-N(3) | 99.93(15)  |
| N(2)-Fe(1)-S(1) | 84.99(11)  |
| N(7)-Fe(1)-S(1) | 168.29(11) |
| N(1)-Fe(1)-S(1) | 80.99(11)  |
| N(4)-Fe(1)-S(1) | 99.18(11)  |
| N(3)-Fe(1)-S(1) | 92.90(11)  |

---

Symmetry transformations used to generate equivalent atoms:



**Table S27.** Anisotropic displacement parameters ( $\text{\AA}^2 \times 10^3$ ) for Thioether-Ligated  $[\text{Fe}^{\text{II}}(\text{tame}-(\text{N}_2\text{S}^{\text{Bz}}(\text{Me}^{\text{e}}\text{Im})_2(\text{MeCN})))](\text{PF}_6)_2 \bullet \text{MeCN}$  (**5**). The anisotropic displacement factor exponent takes the form:  $-2p^2[ h^2a^*2U^{11} + \dots + 2 h k a^* b^* U^{12} ]$

|       | U <sup>11</sup> | U <sup>22</sup> | U <sup>33</sup> | U <sup>23</sup> | U <sup>13</sup> | U <sup>12</sup> |
|-------|-----------------|-----------------|-----------------|-----------------|-----------------|-----------------|
| C(1)  | 17(2)           | 19(3)           | 18(2)           | 4(2)            | -8(2)           | 1(2)            |
| C(2)  | 24(3)           | 16(3)           | 25(3)           | 2(2)            | -3(2)           | 5(2)            |
| C(3)  | 21(3)           | 11(2)           | 22(3)           | -2(2)           | -5(2)           | 3(2)            |
| C(4)  | 39(3)           | 16(3)           | 27(3)           | -4(2)           | -12(2)          | 3(2)            |
| C(5)  | 25(3)           | 11(2)           | 20(2)           | 3(2)            | -11(2)          | 1(2)            |
| C(6)  | 16(2)           | 21(3)           | 16(2)           | 7(2)            | -5(2)           | -1(2)           |
| C(7)  | 18(2)           | 21(3)           | 13(2)           | 3(2)            | -5(2)           | -3(2)           |
| C(8)  | 14(2)           | 16(2)           | 19(2)           | 1(2)            | -3(2)           | -4(2)           |
| C(9)  | 21(3)           | 19(3)           | 17(2)           | 0(2)            | 0(2)            | -4(2)           |
| C(10) | 25(3)           | 20(3)           | 19(2)           | 0(2)            | -10(2)          | -1(2)           |
| C(11) | 30(3)           | 14(3)           | 28(3)           | -8(2)           | -15(2)          | 2(2)            |
| C(12) | 14(2)           | 26(3)           | 15(2)           | -3(2)           | -3(2)           | -3(2)           |
| C(13) | 11(2)           | 24(3)           | 15(2)           | 6(2)            | -1(2)           | -2(2)           |
| C(14) | 21(3)           | 15(2)           | 12(2)           | 3(2)            | -4(2)           | -3(2)           |
| C(15) | 20(3)           | 17(3)           | 20(2)           | 7(2)            | -4(2)           | -2(2)           |
| C(16) | 22(3)           | 32(3)           | 20(3)           | 0(2)            | -13(2)          | 1(2)            |
| C(17) | 14(2)           | 20(3)           | 14(2)           | 5(2)            | -4(2)           | 2(2)            |
| C(18) | 20(3)           | 15(2)           | 17(2)           | -1(2)           | -8(2)           | -3(2)           |
| C(19) | 19(3)           | 19(3)           | 22(3)           | 8(2)            | -9(2)           | -9(2)           |
| C(20) | 14(3)           | 29(3)           | 20(3)           | 1(2)            | 1(2)            | 5(2)            |
| C(21) | 32(3)           | 30(3)           | 17(3)           | -1(2)           | -7(2)           | -2(2)           |
| C(22) | 25(3)           | 20(3)           | 20(3)           | -3(2)           | -7(2)           | -3(2)           |
| C(23) | 24(3)           | 24(3)           | 21(3)           | -4(2)           | -7(2)           | -1(2)           |
| C(24) | 27(3)           | 27(3)           | 18(3)           | -2(2)           | 3(2)            | -6(2)           |
| C(25) | 92(6)           | 32(4)           | 67(5)           | 12(3)           | -51(5)          | -14(4)          |
| C(26) | 49(4)           | 52(4)           | 45(4)           | -5(3)           | -12(3)          | -5(3)           |
| N(1)  | 16(2)           | 14(2)           | 15(2)           | 4(2)            | -4(2)           | -7(2)           |
| N(3)  | 14(2)           | 17(2)           | 14(2)           | 3(2)            | -1(2)           | -2(2)           |
| N(5)  | 16(2)           | 16(2)           | 16(2)           | 3(2)            | -5(2)           | -7(2)           |
| N(2)  | 13(2)           | 12(2)           | 22(2)           | 4(2)            | -6(2)           | -2(2)           |

|       |        |        |       |        |        |        |
|-------|--------|--------|-------|--------|--------|--------|
| N(4)  | 13(2)  | 19(2)  | 12(2) | 2(2)   | -2(2)  | -1(2)  |
| N(6)  | 14(2)  | 21(2)  | 11(2) | 5(2)   | -3(2)  | -1(2)  |
| N(7)  | 16(2)  | 17(2)  | 20(2) | 0(2)   | -6(2)  | 1(2)   |
| N(8)  | 145(7) | 62(4)  | 85(5) | 11(4)  | -76(5) | -42(4) |
| F(1)  | 20(2)  | 74(3)  | 48(2) | 11(2)  | -10(2) | 5(2)   |
| F(2)  | 77(3)  | 43(2)  | 93(3) | 27(2)  | -43(2) | -34(2) |
| F(3)  | 45(2)  | 30(2)  | 79(3) | -9(2)  | -21(2) | -8(2)  |
| F(4)  | 29(2)  | 41(2)  | 65(2) | -13(2) | -11(2) | 12(2)  |
| F(5)  | 52(2)  | 56(2)  | 28(2) | 2(2)   | -10(2) | -3(2)  |
| F(6)  | 63(3)  | 119(4) | 27(2) | 1(2)   | -18(2) | 18(2)  |
| F(7)  | 30(2)  | 46(2)  | 37(2) | 2(2)   | 0(1)   | -10(2) |
| F(8)  | 31(2)  | 24(2)  | 55(2) | -4(1)  | -13(2) | -7(1)  |
| F(9)  | 29(2)  | 36(2)  | 55(2) | 14(2)  | -20(2) | -2(1)  |
| F(10) | 37(2)  | 30(2)  | 36(2) | 5(1)   | -12(2) | -18(1) |
| F(11) | 32(2)  | 35(2)  | 31(2) | 2(1)   | -3(1)  | -6(1)  |
| F(12) | 39(2)  | 29(2)  | 49(2) | -6(1)  | -19(2) | 13(1)  |
| P(1)  | 19(1)  | 26(1)  | 24(1) | -1(1)  | -5(1)  | -3(1)  |
| P(2)  | 22(1)  | 21(1)  | 32(1) | 3(1)   | -7(1)  | -3(1)  |
| S(1)  | 16(1)  | 14(1)  | 14(1) | 2(1)   | -4(1)  | -1(1)  |
| Fe(1) | 14(1)  | 13(1)  | 13(1) | 2(1)   | -4(1)  | -2(1)  |

---

**Table S28.** Hydrogen coordinates ( $\times 10^4$ ) and isotropic displacement parameters ( $\text{\AA}^2 \times 10^3$ ) for Thioether-Ligated  $[\text{Fe}^{\text{II}}(\text{tame}-(\text{N}_2\text{S}^{\text{Bz}}(\text{MeIm})_2(\text{MeCN})))(\text{PF}_6)_2 \bullet \text{MeCN}$  (**5**).

|        | x     | y     | z     | U(eq) |
|--------|-------|-------|-------|-------|
| H(1A)  | 6170  | 5485  | 8532  | 21    |
| H(1B)  | 6477  | 6667  | 8834  | 21    |
| H(2A)  | 4157  | 8354  | 7669  | 27    |
| H(2B)  | 4937  | 8289  | 8549  | 27    |
| H(4A)  | 4241  | 10305 | 7595  | 40    |
| H(4B)  | 5539  | 10842 | 7292  | 40    |
| H(4C)  | 5068  | 10249 | 8445  | 40    |
| H(5A)  | 4996  | 9425  | 5854  | 22    |
| H(5B)  | 6425  | 9674  | 5567  | 22    |
| H(6)   | 5107  | 8167  | 4499  | 21    |
| H(8)   | 7527  | 4452  | 4781  | 20    |
| H(9)   | 6276  | 4335  | 3464  | 24    |
| H(10A) | 4190  | 6801  | 3555  | 31    |
| H(10B) | 4456  | 5611  | 3023  | 31    |
| H(10C) | 5286  | 6572  | 2467  | 31    |
| H(11A) | 7566  | 9635  | 6866  | 28    |
| H(11B) | 7045  | 9215  | 8092  | 28    |
| H(12)  | 8801  | 8010  | 8023  | 22    |
| H(14)  | 8965  | 4456  | 5888  | 19    |
| H(15)  | 10503 | 4238  | 6973  | 23    |
| H(16A) | 11300 | 6519  | 7811  | 35    |
| H(16B) | 11023 | 5383  | 8435  | 35    |
| H(16C) | 10129 | 6460  | 8848  | 35    |
| H(18)  | 3755  | 5284  | 8905  | 20    |
| H(19)  | 1870  | 5517  | 10243 | 23    |
| H(20)  | 1655  | 6719  | 11671 | 27    |
| H(21)  | 3302  | 7684  | 11777 | 31    |
| H(22)  | 5203  | 7465  | 10432 | 26    |
| H(24A) | 11033 | 8306  | 3308  | 38    |
| H(24B) | 10007 | 9312  | 3390  | 38    |

|        |       |      |       |    |
|--------|-------|------|-------|----|
| H(24C) | 10064 | 8320 | 2587  | 38 |
| H(26A) | 8229  | 670  | 11380 | 73 |
| H(26B) | 8069  | 1840 | 10829 | 73 |
| H(26C) | 9423  | 1231 | 10676 | 73 |

---

- (1) Lugo-Mas, P.; Taylor, W.; Schweitzer, D.; Theisen, R. M.; Xu, L.; Shearer, J.; Swartz, R. D.; Gleaves, M. C.; Dipasquale, A.; Kaminsky, W.; Kovacs, J. A. Properties of square-pyramidal alkyl-thiolate Fe(III) complexes, including an analogue of the unmodified form of nitrile hydratase. *Inorg Chem* **2008**, *47*, 11228-11236.
- (2) Neese, F. The ORCA program system. *Interdiscip. Rev. Comput. Mol. Sci.* **2012**, *2*, 73-78.
- (3) Grimme, S.; Ehrlich, S.; Goerigk, L. *J. Comput. Chem* **2011**, *32*, 1456-1465.
- (4) Grimme, S.; Antony, J.; Ehrlich, S.; Krieg, H. *J. Chem. Phys.* **2010**, *132*, 154104-154117.
- (5) van Wullen, C. *J. Chem. Phys.* **1998**, *109*, 392.
- (6) Klamt, A.; Schüürmann, G. *J. Chem. Soc., Perkin Trans.* **1993**, 799-805.
- (7) Becke, A. D. *Phys. Rev. A: Gen. Phys.* **1988**, *38*, 3098-3100.
- (8) Perdew, J. P. *Phys. Rev. B* **1986**, *33*, 8822-8224.
- (9) Römelt, M.; Ye, S.; Neese, F. *Inorg. Chem.* **2009**, *48*, 784-785.
- (10) Neese, F.; Wennmohs, F.; Hansen, A.; Becker, U. *Chem. Phys.* **2009**, *356*, 98-109.
- (11) Dunlap, B. I.; Connolly, J. W. D.; Sabin, J. R. *J. Chem. Phys.* **1979**, *71*, 3396-3402.
- (12) Feyereisen, M.; Fitzgerald, G.; Komornicki, A., , . *Chem. Phys. Lett.* **1993**, *208*, 359-363.
- (13) Neese, F.; Olbrich, G. *Chem. Phys. Lett.* **2002**, *362*, 170-178.
- (14) Pettersen, E. F.; Goddard, T. D.; Huang, C. C.; Couch, G. S.; Greenblatt, D. M.; Meng, E. C.; Ferrin, T. E. *J. Comput. Chem.* **2004**, *25*, 1605-1612.
- (15) E. Bill, M., Max Planck Institute for Chemical Energy Conversion, Mülheim/Ruhr, Germany.
- (16) M. Kavčič, M. B., A. Mühleisen, F. Gasser, M. Žitnik, K. Bučar, and R. Bohinc. *Review of Scientific Instruments* **2012**, *83*, 033113.
- (17) Thompson, A.; Attwood, D.; Gullikson, E.; Howwels, M. K., K-J; Kirz, J.; Kortright, J.; Lindau, I.; Liu, Y.; Pianetta, P.; Robinson, A. S., J; Underwood, J.; Williams, G.; Winick, H.: *X-ray Data Booklet*; LBNL: California, 2009.
- (18) Ravel, B.; Newville, M. J. ATHENA, ARTEMIS, HEPHAESTUS: data analysis for X-ray absorption spectroscopy using IFEFFIT. *Synchrotron Radiat.* **2005**, *12*, 537-541.
